# Supplementary material for: Interpretable joint clustering of single-cell transcriptomes
Source: Research Square preprint supplement (doi:10.21203/rs.3.rs-3149275/v1), 2023-07-28
Supplement: Supplementary file 1 [file 45d66f01f2942b49610935d4.pdf]

# Supplementary Figure 1

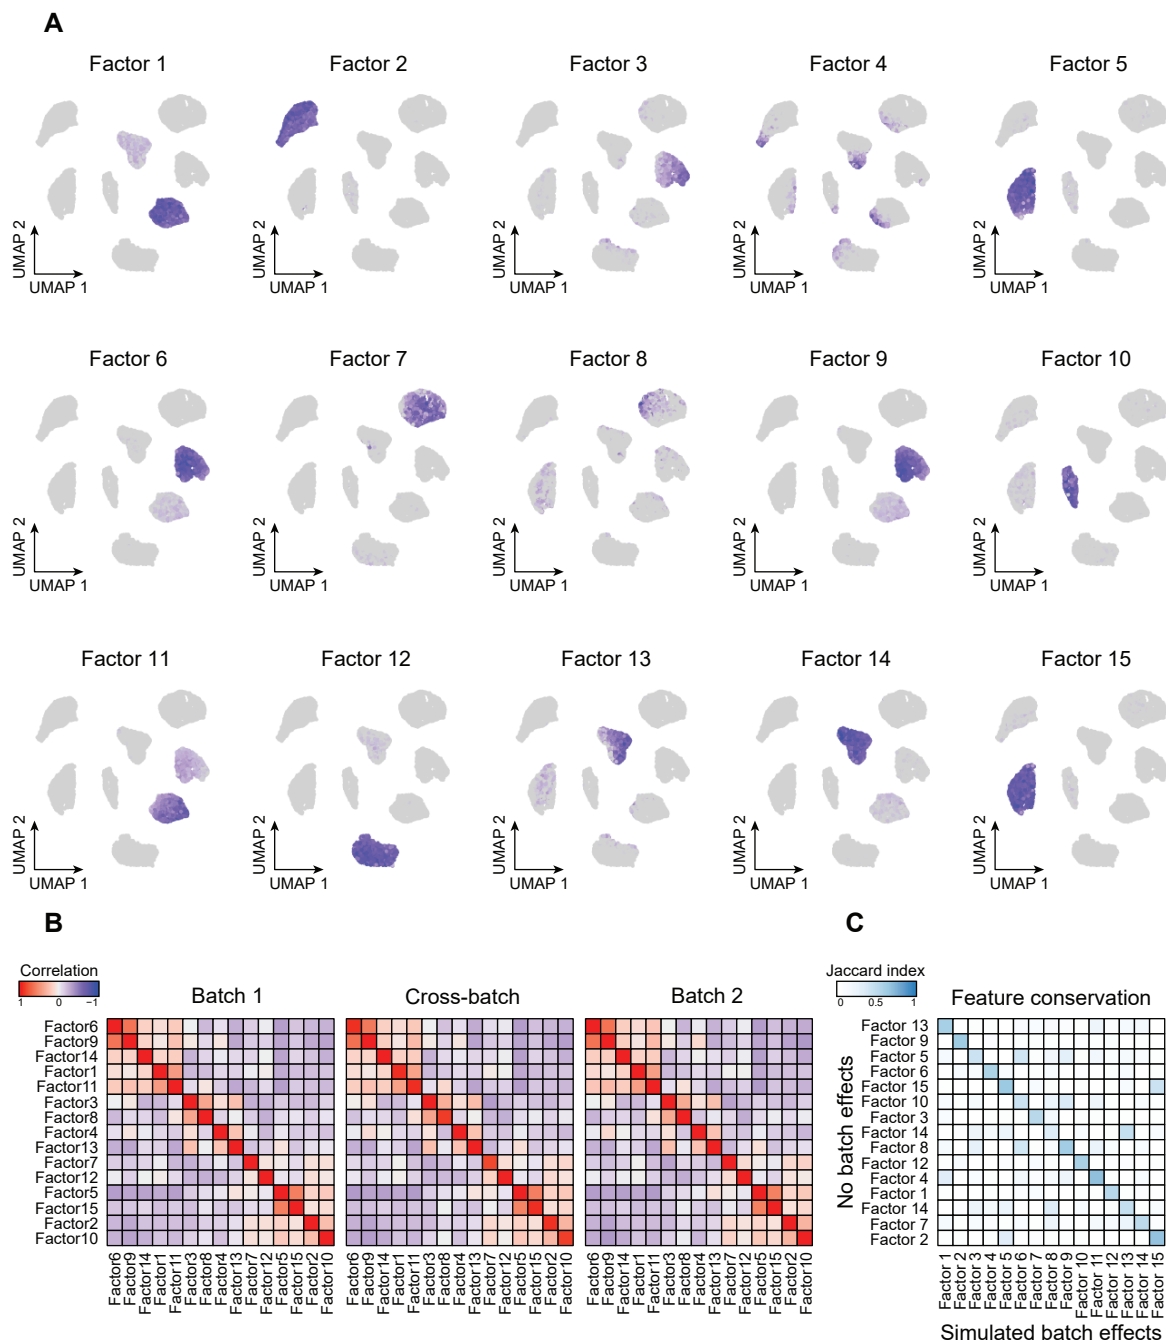

**Supplementary Figure 1: A)** UMAPs colored by module scores derived from JOINTLY factors in cell lines with simulated batch effects. **B)** Heatmap showing pairwise correlation of modules scores derived JOINTLY factor, within (left and right panel), and between batches (middle panel). **C)** Heatmap showing pairwise Jaccard index between factor gene sets from no-noise and noise datasets.
