# Supplementary material for: Interpretable joint clustering of single-cell transcriptomes
Source: Research Square preprint supplement (doi:10.21203/rs.3.rs-3149275/v1), 2023-07-28
Supplement: Supplementary file 1 [file 98d969e3f7aed257002848a0.xlsx]

## Sheet: Overview
Supplementary tables
	Table S1	Raw metrics from benchmarking
	Table S2	Genes assigned to factors in the Emont et al. dataset
	Table S3	Overrepresentation analysis for cell types using genes assigned to factors in the Emont et al. dataset
	Table S4	Marker genes for all populations in the WATLAS
	Table S5	Differential abundance analysis in WATLAS and deconvoluted bulk

## Sheet: S1
			Global							Worst dataset
Dataset	Method	Replicate	ARI	NMI	V-measure	cLISI	iLISI	cASW	bASW	ARI	NMI	V-measure	cLISI	iLISI	cASW	bASW
Lung	JOINTLY	1	0.892302	0.775441	0.798977	0.999844	0.392252	0.608504	0.963636	0.813119	0.670695	0.719979	0.998492	0.263422	0.56265	0.951262
Lung	JOINTLY	2	0.892994	0.779418	0.81386	1	0.368338	0.604433	0.967531	0.821343	0.684944	0.743126	0.998586	0.231368	0.559554	0.946823
Lung	JOINTLY	3	0.896384	0.788245	0.820549	0.999802	0.407337	0.600247	0.966718	0.823285	0.694194	0.751789	0.998361	0.267237	0.553638	0.949808
Lung	JOINTLY	4	0.871417	0.77543	0.798612	0.9999	0.363571	0.603663	0.969888	0.771018	0.679729	0.712304	0.998855	0.255277	0.556713	0.94954
Lung	JOINTLY	5	0.888538	0.776139	0.810305	0.999827	0.368093	0.590705	0.9715	0.816023	0.681973	0.740567	0.998669	0.260651	0.554263	0.958189
Lung	Harmony	1	0.90147	0.79538	0.825931	0.999807	0.536978	0.658201	0.947009	0.836212	0.706998	0.760448	0.999295	0.506108	0.627365	0.892292
Lung	Harmony	2	0.903395	0.796108	0.827333	0.99981	0.537224	0.658324	0.946973	0.836735	0.707657	0.76238	0.999292	0.504206	0.62751	0.892104
Lung	Harmony	3	0.903754	0.796086	0.827662	0.999811	0.536627	0.658279	0.947167	0.836735	0.707657	0.76238	0.999293	0.505841	0.627517	0.892382
Lung	Harmony	4	0.901938	0.794366	0.825345	0.99981	0.53779	0.658009	0.946719	0.83235	0.704268	0.75914	0.9993	0.505374	0.627194	0.891937
Lung	Harmony	5	0.901604	0.794061	0.825017	0.999811	0.536772	0.658266	0.946984	0.833245	0.705091	0.759004	0.999302	0.505293	0.627501	0.891958
Lung	RPCA	1	0.897258	0.797093	0.822094	0.999831	0.510597	0.658258	0.944768	0.820154	0.699048	0.756553	0.998971	0.414338	0.626666	0.902162
Lung	RPCA	2	0.897258	0.797093	0.822094	0.999831	0.510597	0.658258	0.944768	0.820154	0.699048	0.756553	0.998971	0.414338	0.626666	0.902162
Lung	RPCA	3	0.897258	0.797093	0.822094	0.999831	0.510597	0.658258	0.944768	0.820154	0.699048	0.756553	0.998971	0.414338	0.626666	0.902162
Lung	RPCA	4	0.897258	0.797093	0.822094	0.999831	0.510597	0.658258	0.944768	0.820154	0.699048	0.756553	0.998971	0.414338	0.626666	0.902162
Lung	RPCA	5	0.897258	0.797093	0.822094	0.999831	0.510597	0.658258	0.944768	0.820154	0.699048	0.756553	0.998971	0.414338	0.626666	0.902162
Lung	LIGER	1	0.73983	0.700017	0.71373	0.99962	0.533887	0.603271	0.97545	0.695211	0.646406	0.654073	0.99884	0.498895	0.57844	0.95739
Lung	LIGER	2	0.73983	0.700017	0.71373	0.99962	0.533887	0.603271	0.97545	0.695211	0.646406	0.654073	0.99884	0.498895	0.57844	0.95739
Lung	LIGER	3	0.73983	0.700017	0.71373	0.99962	0.533887	0.603271	0.97545	0.695211	0.646406	0.654073	0.99884	0.498895	0.57844	0.95739
Lung	LIGER	4	0.73983	0.700017	0.71373	0.99962	0.533887	0.603271	0.97545	0.695211	0.646406	0.654073	0.99884	0.498895	0.57844	0.95739
Lung	LIGER	5	0.73983	0.700017	0.71373	0.99962	0.533887	0.603271	0.97545	0.695211	0.646406	0.654073	0.99884	0.498895	0.57844	0.95739
Lung	FastMNN	1	0.906701	0.79933	0.826798	1	0.429856	0.669184	0.925676	0.829963	0.722431	0.763501	0.99867	0.252825	0.624509	0.863756
Lung	FastMNN	2	0.903892	0.797739	0.823992	1	0.429542	0.669136	0.925694	0.82864	0.718794	0.759012	0.99867	0.252731	0.624478	0.863812
Lung	FastMNN	3	0.899623	0.80202	0.825631	1	0.429469	0.669183	0.925696	0.826232	0.716299	0.767649	0.998672	0.252809	0.624513	0.863838
Lung	FastMNN	4	0.863067	0.781173	0.796562	1	0.429787	0.669183	0.925674	0.800397	0.722354	0.741699	0.998657	0.251985	0.624506	0.863755
Lung	FastMNN	5	0.862529	0.780588	0.796249	1	0.429966	0.669181	0.925674	0.800137	0.722354	0.741522	0.998671	0.25215	0.624509	0.863753
Lung	Unintegrated	1	0.65581	0.58547	0.717078	1	0.0218239	0.627444	0.913592	0.622902	0.591586	0.691358	0.996871	0	0.562096	0.868794
Lung	Unintegrated	2	0.65581	0.58547	0.717078	1	0.0218239	0.627444	0.913592	0.622902	0.591586	0.691358	0.996871	0	0.562096	0.868794
Lung	Unintegrated	3	0.65581	0.58547	0.717078	1	0.0218239	0.627444	0.913592	0.622902	0.591586	0.691358	0.996871	0	0.562096	0.868794
Lung	Unintegrated	4	0.65581	0.58547	0.717078	1	0.0218239	0.627444	0.913592	0.622902	0.591586	0.691358	0.996871	0	0.562096	0.868794
Lung	Unintegrated	5	0.65581	0.58547	0.717078	1	0.0218239	0.627444	0.913592	0.622902	0.591586	0.691358	0.996871	0	0.562096	0.868794
Lung	Scanorama	1	0.900481	0.79667	0.821786	1	0.483372	0.630816	0.944932	0.831959	0.717205	0.760014	0.99868	0.406796	0.597971	0.896631
Lung	Scanorama	2	0.900481	0.79667	0.821786	1	0.483372	0.630816	0.944932	0.831959	0.717205	0.760014	0.99868	0.406796	0.597971	0.896631
Lung	Scanorama	3	0.900481	0.79667	0.821786	1	0.483372	0.630816	0.944932	0.831959	0.717205	0.760014	0.99868	0.406796	0.597971	0.896631
Lung	Scanorama	4	0.900481	0.79667	0.821786	1	0.483372	0.630816	0.944932	0.831959	0.717205	0.760014	0.99868	0.406796	0.597971	0.896631
Lung	Scanorama	5	0.900481	0.79667	0.821786	1	0.483372	0.630816	0.944932	0.831959	0.717205	0.760014	0.99868	0.406796	0.597971	0.896631
Lung	scVI	1	0.88148	0.777583	0.80065	0.999533	0.495376	0.591262	0.964859	0.814	0.692397	0.743063	0.998772	0.429672	0.574582	0.927898
Lung	scVI	2	0.655141	0.637429	0.710449	0.999542	0.500741	0.592939	0.964221	0.616681	0.616764	0.694248	0.998441	0.424246	0.576095	0.927658
Lung	scVI	3	0.865304	0.767096	0.788303	0.999701	0.491669	0.591185	0.962064	0.811348	0.708517	0.743266	0.9989	0.419719	0.575015	0.922846
Lung	scVI	4	0.821492	0.74262	0.753757	0.999659	0.501155	0.596161	0.96186	0.768391	0.682324	0.705418	0.99878	0.429535	0.578297	0.922302
Lung	scVI	5	0.890393	0.786315	0.810608	0.999609	0.501015	0.593283	0.962466	0.820954	0.714908	0.752675	0.99858	0.42533	0.577282	0.919382
Liver	JOINTLY	1	0.812116	0.710935	0.742121	0.996976	0.0937615	0.590376	0.935721	0.657168	0.560278	0.593159	0.990266	0.000482698	0.549046	0.863005
Liver	JOINTLY	2	0.823743	0.730056	0.756302	0.998238	0.10343	0.601425	0.931621	0.719544	0.566157	0.59554	0.990078	0.00071677	0.535297	0.872085
Liver	JOINTLY	3	0.723141	0.66668	0.679768	0.996555	0.065163	0.575569	0.936199	0.39236	0.489362	0.573955	0.989912	0.000575999	0.530346	0.861306
Liver	JOINTLY	4	0.75231	0.656813	0.714288	0.996594	0.0766407	0.575604	0.941695	0.440326	0.564935	0.605465	0.990184	0.00205507	0.527876	0.868834
Liver	JOINTLY	5	0.786179	0.701631	0.733177	0.997974	0.0911168	0.588931	0.948651	0.703207	0.557084	0.581141	0.990874	0.00237747	0.512606	0.900003
Liver	Harmony	1	0.831114	0.775991	0.779539	0.998192	0.259579	0.602459	0.895354	0.727745	0.615351	0.634217	0.993098	0.0731813	0.552631	0.772911
Liver	Harmony	2	0.81741	0.748428	0.772771	0.99822	0.26161	0.604431	0.895986	0.72718	0.615095	0.646042	0.992813	0.0726354	0.553853	0.773008
Liver	Harmony	3	0.819517	0.739442	0.770869	0.998165	0.261187	0.603006	0.895106	0.735809	0.597574	0.643945	0.992604	0.0747158	0.550819	0.771086
Liver	Harmony	4	0.833484	0.773229	0.778636	0.998156	0.260664	0.603721	0.895729	0.725316	0.628951	0.647822	0.992861	0.0717276	0.552275	0.77164
Liver	Harmony	5	0.8328	0.774048	0.779549	0.998193	0.262029	0.604148	0.895832	0.724267	0.635897	0.651863	0.992758	0.0728893	0.553626	0.772687
Liver	RPCA	1	0.854138	0.793152	0.815606	0.998938	0.231031	0.605061	0.899844	0.760218	0.636425	0.708747	0.995483	0.0497494	0.583298	0.803925
Liver	RPCA	2	0.854138	0.793152	0.815606	0.998938	0.231031	0.605061	0.899844	0.760218	0.636425	0.708747	0.995483	0.0497494	0.583298	0.803925
Liver	RPCA	3	0.854138	0.793152	0.815606	0.998938	0.231031	0.605061	0.899844	0.760218	0.636425	0.708747	0.995483	0.0497494	0.583298	0.803925
Liver	RPCA	4	0.854138	0.793152	0.815606	0.998938	0.231031	0.605061	0.899844	0.760218	0.636425	0.708747	0.995483	0.0497494	0.583298	0.803925
Liver	RPCA	5	0.854138	0.793152	0.815606	0.998938	0.231031	0.605061	0.899844	0.760218	0.636425	0.708747	0.995483	0.0497494	0.583298	0.803925
Liver	LIGER	1	0.763583	0.704036	0.723306	0.995555	0.21902	0.567705	0.903658	0.645818	0.571335	0.596626	0.993467	0.0904229	0.544597	0.887876
Liver	LIGER	2	0.763583	0.704036	0.723306	0.995555	0.21902	0.567705	0.903658	0.645818	0.571335	0.596626	0.993467	0.0904229	0.544597	0.887876
Liver	LIGER	3	0.763583	0.704036	0.723306	0.995555	0.21902	0.567705	0.903658	0.645818	0.571335	0.596626	0.993467	0.0904229	0.544597	0.887876
Liver	LIGER	4	0.763583	0.704036	0.723306	0.995555	0.21902	0.567705	0.903658	0.645818	0.571335	0.596626	0.993467	0.0904229	0.544597	0.887876
Liver	LIGER	5	0.763583	0.704036	0.723306	0.995555	0.21902	0.567705	0.903658	0.645818	0.571335	0.596626	0.993467	0.0904229	0.544597	0.887876
Liver	FastMNN	1	0.848507	0.785247	0.817541	0.99895	0.226295	0.639406	0.845449	0.748962	0.587774	0.690514	0.996287	0.0500709	0.626131	0.672808
Liver	FastMNN	2	0.861089	0.79478	0.831623	0.998946	0.225947	0.639405	0.845462	0.801863	0.587774	0.690514	0.996279	0.0500951	0.626138	0.672818
Liver	FastMNN	3	0.84782	0.783117	0.817476	0.998951	0.226213	0.639408	0.84546	0.750718	0.584765	0.68897	0.996288	0.049889	0.62613	0.672823
Liver	FastMNN	4	0.861584	0.795273	0.831971	0.99895	0.225892	0.639407	0.845469	0.804216	0.588024	0.692613	0.996282	0.0498382	0.626141	0.672828
Liver	FastMNN	5	0.861089	0.79478	0.831623	0.998947	0.226015	0.639406	0.845466	0.801863	0.587774	0.690514	0.996282	0.0499464	0.626139	0.672824
Liver	Unintegrated	1	0.727132	0.744599	0.765038	0.998858	0.00262617	0.59418	0.87095	0.758998	0.623755	0.69736	0.990829	0	0.571075	0.744013
Liver	Unintegrated	2	0.727132	0.744599	0.765038	0.998858	0.00262617	0.59418	0.87095	0.758998	0.623755	0.69736	0.990829	0	0.571075	0.744013
Liver	Unintegrated	3	0.727132	0.744599	0.765038	0.998858	0.00262617	0.59418	0.87095	0.758998	0.623755	0.69736	0.990829	0	0.571075	0.744013
Liver	Unintegrated	4	0.727132	0.744599	0.765038	0.998858	0.00262617	0.59418	0.87095	0.758998	0.623755	0.69736	0.990829	0	0.571075	0.744013
Liver	Unintegrated	5	0.727132	0.744599	0.765038	0.998858	0.00262617	0.59418	0.87095	0.758998	0.623755	0.69736	0.990829	0	0.571075	0.744013
Liver	Scanorama	1	0.779726	0.752595	0.755695	0.997321	0.210413	0.562314	0.944767	0.729697	0.635659	0.649216	0.992587	0.0582285	0.528793	0.914355
Liver	Scanorama	2	0.779726	0.752595	0.755695	0.997321	0.210413	0.562314	0.944767	0.729697	0.635659	0.649216	0.992587	0.0582285	0.528793	0.914355
Liver	Scanorama	3	0.779726	0.752595	0.755695	0.997321	0.210413	0.562314	0.944767	0.729697	0.635659	0.649216	0.992587	0.0582285	0.528793	0.914355
Liver	Scanorama	4	0.779726	0.752595	0.755695	0.997321	0.210413	0.562314	0.944767	0.729697	0.635659	0.649216	0.992587	0.0582285	0.528793	0.914355
Liver	Scanorama	5	0.779726	0.752595	0.755695	0.997321	0.210413	0.562314	0.944767	0.729697	0.635659	0.649216	0.992587	0.0582285	0.528793	0.914355
Liver	scVI	1	0.824287	0.742258	0.798022	0.997953	0.156775	0.598113	0.923635	0.635893	0.591118	0.696257	0.993948	0.0576754	0.582405	0.900867
Liver	scVI	2	0.849819	0.783358	0.805565	0.997965	0.156054	0.597739	0.926665	0.715973	0.610383	0.691707	0.993962	0.0575659	0.58685	0.881583
Liver	scVI	3	0.839598	0.756018	0.79725	0.998032	0.14512	0.605989	0.909396	0.688818	0.611348	0.694538	0.994519	0.0532995	0.587178	0.870506
Liver	scVI	4	0.822261	0.747226	0.789954	0.997742	0.173763	0.598573	0.929045	0.659078	0.600245	0.682939	0.994025	0.068674	0.586161	0.907986
Liver	scVI	5	0.823073	0.744452	0.784411	0.99773	0.159081	0.597095	0.923881	0.616182	0.613174	0.693878	0.993834	0.0579818	0.581299	0.887728
Pancreas	JOINTLY	1	0.903893	0.826538	0.838751	1	0.28486	0.632062	0.960637	0.754129	0.724671	0.746248	1	0.222134	0.589485	0.950482
Pancreas	JOINTLY	2	0.915145	0.845907	0.851484	1	0.296749	0.617753	0.961397	0.793342	0.745065	0.768926	1	0.224684	0.589907	0.953201
Pancreas	JOINTLY	3	0.884006	0.808038	0.833856	1	0.31035	0.657838	0.967832	0.766565	0.738335	0.753072	1	0.232213	0.635088	0.957377
Pancreas	JOINTLY	4	0.920136	0.83977	0.855012	1	0.2603	0.649863	0.965087	0.818042	0.765029	0.777213	1	0.182789	0.628953	0.955194
Pancreas	JOINTLY	5	0.878613	0.806683	0.824271	1	0.292639	0.654371	0.967046	0.769087	0.715882	0.760258	1	0.238635	0.619807	0.954
Pancreas	Harmony	1	0.855435	0.808037	0.827605	1	0.40619	0.615012	0.947198	0.791475	0.741689	0.768363	1	0.377573	0.589763	0.89726
Pancreas	Harmony	2	0.863492	0.812145	0.835042	1	0.406893	0.614912	0.947269	0.796944	0.748435	0.772121	1	0.380177	0.589375	0.897277
Pancreas	Harmony	3	0.866028	0.813433	0.832046	1	0.40588	0.615288	0.947111	0.781644	0.737654	0.761736	1	0.37773	0.589731	0.897011
Pancreas	Harmony	4	0.861925	0.810531	0.824918	1	0.405965	0.615182	0.947079	0.781665	0.739806	0.743359	1	0.378841	0.589374	0.897079
Pancreas	Harmony	5	0.849233	0.803526	0.811348	1	0.40666	0.614957	0.9471	0.769673	0.727357	0.737381	1	0.380287	0.589483	0.897164
Pancreas	RPCA	1	0.881626	0.813264	0.850935	1	0.404656	0.634548	0.950833	0.803543	0.741439	0.792463	1	0.39065	0.625138	0.898274
Pancreas	RPCA	2	0.881626	0.813264	0.850935	1	0.404656	0.634548	0.950833	0.803543	0.741439	0.792463	1	0.39065	0.625138	0.898274
Pancreas	RPCA	3	0.881626	0.813264	0.850935	1	0.404656	0.634548	0.950833	0.803543	0.741439	0.792463	1	0.39065	0.625138	0.898274
Pancreas	RPCA	4	0.881626	0.813264	0.850935	1	0.404656	0.634548	0.950833	0.803543	0.741439	0.792463	1	0.39065	0.625138	0.898274
Pancreas	RPCA	5	0.881626	0.813264	0.850935	1	0.404656	0.634548	0.950833	0.803543	0.741439	0.792463	1	0.39065	0.625138	0.898274
Pancreas	LIGER	1	0.904702	0.824978	0.837913	1	0.431374	0.60301	0.929016	0.855547	0.761227	0.794711	1	0.410169	0.588257	0.841609
Pancreas	LIGER	2	0.904702	0.824978	0.837913	1	0.431374	0.60301	0.929016	0.855547	0.761227	0.794711	1	0.410169	0.588257	0.841609
Pancreas	LIGER	3	0.904702	0.824978	0.837913	1	0.431374	0.60301	0.929016	0.855547	0.761227	0.794711	1	0.410169	0.588257	0.841609
Pancreas	LIGER	4	0.904702	0.824978	0.837913	1	0.431374	0.60301	0.929016	0.855547	0.761227	0.794711	1	0.410169	0.588257	0.841609
Pancreas	LIGER	5	0.904702	0.824978	0.837913	1	0.431374	0.60301	0.929016	0.855547	0.761227	0.794711	1	0.410169	0.588257	0.841609
Pancreas	FastMNN	1	0.865423	0.789222	0.807031	1	0.28129	0.741755	0.94364	0.764259	0.712599	0.725121	1	0.242482	0.682648	0.916252
Pancreas	FastMNN	2	0.881369	0.799948	0.81973	1	0.281352	0.741754	0.94364	0.772945	0.717533	0.73075	1	0.24247	0.682647	0.916252
Pancreas	FastMNN	3	0.881369	0.799948	0.81973	1	0.281352	0.741754	0.94364	0.772945	0.717533	0.73075	1	0.24247	0.682647	0.916252
Pancreas	FastMNN	4	0.881369	0.799948	0.81973	1	0.281352	0.741754	0.94364	0.772945	0.717533	0.73075	1	0.24247	0.682647	0.916252
Pancreas	FastMNN	5	0.875661	0.795556	0.814145	1	0.281339	0.741757	0.94364	0.731618	0.689541	0.700772	1	0.242361	0.682605	0.91625
Pancreas	Unintegrated	1	0.666661	0.688702	0.706613	1	0.049041	0.581271	0.945528	0.722113	0.713818	0.738302	0.999188	0.0066649	0.538096	0.911627
Pancreas	Unintegrated	2	0.666661	0.688702	0.706613	1	0.049041	0.581271	0.945528	0.722113	0.713818	0.738302	0.999188	0.0066649	0.538096	0.911627
Pancreas	Unintegrated	3	0.666661	0.688702	0.706613	1	0.049041	0.581271	0.945528	0.722113	0.713818	0.738302	0.999188	0.0066649	0.538096	0.911627
Pancreas	Unintegrated	4	0.666661	0.688702	0.706613	1	0.049041	0.581271	0.945528	0.722113	0.713818	0.738302	0.999188	0.0066649	0.538096	0.911627
Pancreas	Unintegrated	5	0.666661	0.688702	0.706613	1	0.049041	0.581271	0.945528	0.722113	0.713818	0.738302	0.999188	0.0066649	0.538096	0.911627
Pancreas	Scanorama	1	0.887979	0.837611	0.858474	1	0.334229	0.579938	0.958938	0.828942	0.782518	0.800978	1	0.296837	0.551253	0.925827
Pancreas	Scanorama	2	0.887979	0.837611	0.858474	1	0.334229	0.579938	0.958938	0.828942	0.782518	0.800978	1	0.296837	0.551253	0.925827
Pancreas	Scanorama	3	0.887979	0.837611	0.858474	1	0.334229	0.579938	0.958938	0.828942	0.782518	0.800978	1	0.296837	0.551253	0.925827
Pancreas	Scanorama	4	0.887979	0.837611	0.858474	1	0.334229	0.579938	0.958938	0.828942	0.782518	0.800978	1	0.296837	0.551253	0.925827
Pancreas	Scanorama	5	0.887979	0.837611	0.858474	1	0.334229	0.579938	0.958938	0.828942	0.782518	0.800978	1	0.296837	0.551253	0.925827
Pancreas	scVI	1	0.896645	0.841055	0.858516	1	0.275288	0.637768	0.949551	0.823872	0.773422	0.802082	1	0.226958	0.610744	0.926296
Pancreas	scVI	2	0.932588	0.862844	0.876877	1	0.276685	0.630781	0.948916	0.843045	0.780884	0.80062	1	0.231691	0.61006	0.932012
Pancreas	scVI	3	0.936916	0.88712	0.887704	1	0.267571	0.643929	0.952309	0.80923	0.78291	0.792756	1	0.221361	0.60834	0.923021
Pancreas	scVI	4	0.930058	0.864894	0.878521	1	0.264078	0.636742	0.945391	0.839625	0.78508	0.803977	1	0.218024	0.614094	0.918425
Pancreas	scVI	5	0.926805	0.882067	0.885912	1	0.265567	0.642108	0.948211	0.834091	0.809911	0.811736	1	0.218947	0.617608	0.924104
Kidney	JOINTLY	1	0.533516	0.61112	0.646968	0.999538	0.176683	0.592547	0.954491	0.373903	0.40121	0.454255	0.975014	0.0508082	0.512755	0.920852
Kidney	JOINTLY	2	0.559277	0.620273	0.649112	0.999525	0.198727	0.583268	0.956409	0.377175	0.411148	0.469665	0.974024	0.0441527	0.502899	0.932285
Kidney	JOINTLY	3	0.513785	0.61378	0.6503	0.999594	0.184406	0.591955	0.955893	0.356195	0.426171	0.464043	0.969476	0.052172	0.525587	0.922764
Kidney	JOINTLY	4	0.536096	0.599449	0.652975	0.999602	0.179494	0.590648	0.954622	0.370579	0.399518	0.461651	0.970908	0.0552005	0.522409	0.923047
Kidney	JOINTLY	5	0.546642	0.610873	0.659723	0.999677	0.185267	0.589911	0.958223	0.401762	0.432791	0.473391	0.975819	0.0615743	0.516117	0.924661
Kidney	Harmony	1	0.518047	0.628138	0.652127	0.999466	0.282926	0.57753	0.915911	0.305863	0.423449	0.485389	0.975836	0.246807	0.508295	0.864028
Kidney	Harmony	2	0.537571	0.624672	0.648769	0.999479	0.283722	0.578032	0.916044	0.399502	0.428718	0.489389	0.974155	0.247101	0.509185	0.864051
Kidney	Harmony	3	0.574845	0.640557	0.651425	0.999483	0.282378	0.577863	0.914346	0.318942	0.431214	0.484947	0.974202	0.247381	0.509365	0.861705
Kidney	Harmony	4	0.522908	0.631664	0.651433	0.999485	0.283105	0.577589	0.916078	0.308329	0.435281	0.494376	0.974349	0.245718	0.509377	0.864312
Kidney	Harmony	5	0.51614	0.608471	0.631097	0.999486	0.283104	0.577435	0.915765	0.359925	0.420861	0.468121	0.974155	0.247332	0.509691	0.864178
Kidney	RPCA	1	0.491922	0.594161	0.630738	0.999644	0.308967	0.596998	0.901651	0.35136	0.439342	0.489032	0.968218	0.218099	0.540082	0.848574
Kidney	RPCA	2	0.491922	0.594161	0.630738	0.999644	0.308967	0.596998	0.901651	0.35136	0.439342	0.489032	0.968218	0.218099	0.540082	0.848574
Kidney	RPCA	3	0.491922	0.594161	0.630738	0.999644	0.308967	0.596998	0.901651	0.35136	0.439342	0.489032	0.968218	0.218099	0.540082	0.848574
Kidney	RPCA	4	0.491922	0.594161	0.630738	0.999644	0.308967	0.596998	0.901651	0.35136	0.439342	0.489032	0.968218	0.218099	0.540082	0.848574
Kidney	RPCA	5	0.491922	0.594161	0.630738	0.999644	0.308967	0.596998	0.901651	0.35136	0.439342	0.489032	0.968218	0.218099	0.540082	0.848574
Kidney	LIGER	1	0.49165	0.576167	0.624009	0.998663	0.317314	0.562086	0.947425	0.347101	0.409751	0.46982	0.961464	0.28428	0.50628	0.911961
Kidney	LIGER	2	0.49165	0.576167	0.624009	0.998663	0.317314	0.562086	0.947425	0.347101	0.409751	0.46982	0.961464	0.28428	0.50628	0.911961
Kidney	LIGER	3	0.49165	0.576167	0.624009	0.998663	0.317314	0.562086	0.947425	0.347101	0.409751	0.46982	0.961464	0.28428	0.50628	0.911961
Kidney	LIGER	4	0.49165	0.576167	0.624009	0.998663	0.317314	0.562086	0.947425	0.347101	0.409751	0.46982	0.961464	0.28428	0.50628	0.911961
Kidney	LIGER	5	0.49165	0.576167	0.624009	0.998663	0.317314	0.562086	0.947425	0.347101	0.409751	0.46982	0.961464	0.28428	0.50628	0.911961
Kidney	FastMNN	1	0.563995	0.656491	0.658062	1	0.252502	0.594731	0.896006	0.333691	0.490462	0.534777	0.971494	0.120506	0.55427	0.808178
Kidney	FastMNN	2	0.560752	0.659156	0.660543	1	0.252561	0.594751	0.896005	0.379962	0.475778	0.526003	0.971458	0.121301	0.554279	0.808165
Kidney	FastMNN	3	0.559824	0.657441	0.659086	1	0.252501	0.594753	0.896004	0.344046	0.498052	0.525775	0.97142	0.121293	0.554261	0.808158
Kidney	FastMNN	4	0.549937	0.658532	0.659022	1	0.252523	0.594752	0.896013	0.341126	0.47084	0.519271	0.971371	0.121297	0.554278	0.808181
Kidney	FastMNN	5	0.55822	0.65674	0.658358	1	0.252463	0.594752	0.896002	0.333639	0.457302	0.512506	0.97149	0.121473	0.554311	0.80817
Kidney	Unintegrated	1	0.51781	0.621073	0.637433	0.999835	0.16225	0.578004	0.90588	0.324348	0.468604	0.512726	0.968283	0.0222479	0.530948	0.856447
Kidney	Unintegrated	2	0.51781	0.621073	0.637433	0.999835	0.16225	0.578004	0.90588	0.324348	0.468604	0.512726	0.968283	0.0222479	0.530948	0.856447
Kidney	Unintegrated	3	0.51781	0.621073	0.637433	0.999835	0.16225	0.578004	0.90588	0.324348	0.468604	0.512726	0.968283	0.0222479	0.530948	0.856447
Kidney	Unintegrated	4	0.51781	0.621073	0.637433	0.999835	0.16225	0.578004	0.90588	0.324348	0.468604	0.512726	0.968283	0.0222479	0.530948	0.856447
Kidney	Unintegrated	5	0.51781	0.621073	0.637433	0.999835	0.16225	0.578004	0.90588	0.324348	0.468604	0.512726	0.968283	0.0222479	0.530948	0.856447
Kidney	Scanorama	1	0.512342	0.626081	0.641173	0.999934	0.272758	0.566947	0.904165	0.362791	0.45463	0.507352	0.970793	0.119671	0.496711	0.872232
Kidney	Scanorama	2	0.512342	0.626081	0.641173	0.999934	0.272758	0.566947	0.904165	0.362791	0.45463	0.507352	0.970793	0.119671	0.496711	0.872232
Kidney	Scanorama	3	0.512342	0.626081	0.641173	0.999934	0.272758	0.566947	0.904165	0.362791	0.45463	0.507352	0.970793	0.119671	0.496711	0.872232
Kidney	Scanorama	4	0.512342	0.626081	0.641173	0.999934	0.272758	0.566947	0.904165	0.362791	0.45463	0.507352	0.970793	0.119671	0.496711	0.872232
Kidney	Scanorama	5	0.512342	0.626081	0.641173	0.999934	0.272758	0.566947	0.904165	0.362791	0.45463	0.507352	0.970793	0.119671	0.496711	0.872232
Kidney	scVI	1	0.506014	0.623105	0.643939	0.999681	0.21201	0.574526	0.907226	0.319883	0.436121	0.494573	0.960572	0.030843	0.540151	0.873239
Kidney	scVI	2	0.518875	0.622807	0.632383	0.999744	0.210126	0.572041	0.908591	0.308368	0.48257	0.498248	0.963028	0.0269605	0.542086	0.868104
Kidney	scVI	3	0.519856	0.62039	0.640373	0.999729	0.211882	0.571137	0.910515	0.323487	0.469579	0.53449	0.95913	0.0325746	0.545072	0.879746
Kidney	scVI	4	0.478404	0.61805	0.622968	0.999645	0.212533	0.565314	0.904697	0.285408	0.41228	0.489279	0.961879	0.030038	0.538801	0.872251
Kidney	scVI	5	0.519517	0.620291	0.646026	0.999609	0.214948	0.562859	0.90922	0.34263	0.480632	0.54503	0.962056	0.0327962	0.533461	0.874861
PBMC	JOINTLY	1	0.727976	0.762288	0.765583	1	0.284652	0.626882	0.96088	0.586965	0.700415	0.718181	0.999143	0.230141	0.605062	0.94785
PBMC	JOINTLY	2	0.708664	0.744504	0.750468	1	0.268965	0.629163	0.963133	0.596849	0.670825	0.690564	0.999557	0.213804	0.609944	0.948994
PBMC	JOINTLY	3	0.713879	0.744696	0.773033	1	0.287686	0.617513	0.966319	0.589214	0.705012	0.732374	0.998823	0.225187	0.601628	0.947361
PBMC	JOINTLY	4	0.714245	0.764405	0.767681	1	0.288398	0.651093	0.963403	0.608779	0.706512	0.724582	0.999425	0.245018	0.629717	0.944529
PBMC	JOINTLY	5	0.714776	0.767643	0.7868	1	0.279384	0.630939	0.96092	0.583194	0.711961	0.740238	0.999173	0.214205	0.609545	0.945994
PBMC	Harmony	1	0.701241	0.711306	0.738013	1	0.361484	0.631438	0.952241	0.574042	0.662491	0.687024	0.999475	0.327057	0.605147	0.927855
PBMC	Harmony	2	0.722627	0.708646	0.74265	1	0.36184	0.630386	0.951603	0.569985	0.649085	0.682311	0.999392	0.326208	0.604325	0.928042
PBMC	Harmony	3	0.734757	0.752098	0.769907	1	0.361867	0.630802	0.951698	0.594323	0.695909	0.720396	0.999422	0.325808	0.605684	0.928041
PBMC	Harmony	4	0.734605	0.745842	0.767432	1	0.361386	0.630999	0.95177	0.581073	0.685805	0.709965	0.999327	0.326446	0.605005	0.927993
PBMC	Harmony	5	0.742992	0.748519	0.770223	1	0.361782	0.630302	0.951384	0.601193	0.692724	0.715049	0.99938	0.327057	0.605463	0.927651
PBMC	RPCA	1	0.690772	0.741602	0.744267	1	0.375998	0.628214	0.939423	0.539919	0.674918	0.693511	0.999641	0.319022	0.613578	0.915283
PBMC	RPCA	2	0.690772	0.741602	0.744267	1	0.375998	0.628969	0.940352	0.539919	0.674918	0.693511	0.999641	0.319022	0.613763	0.91665
PBMC	RPCA	3	0.690772	0.741602	0.744267	1	0.375998	0.628591	0.939564	0.539919	0.674918	0.693511	0.999641	0.319022	0.613526	0.915698
PBMC	RPCA	4	0.690772	0.741602	0.744267	1	0.375998	0.628555	0.940154	0.539919	0.674918	0.693511	0.999641	0.319022	0.613491	0.915965
PBMC	RPCA	5	0.690772	0.741602	0.744267	1	0.375998	0.628953	0.940106	0.539919	0.674918	0.693511	0.999641	0.319022	0.613849	0.91648
PBMC	LIGER	1	0.680069	0.725101	0.725807	1	0.386749	0.627487	0.969962	0.559872	0.648855	0.665237	0.998874	0.365071	0.613195	0.946823
PBMC	LIGER	2	0.680069	0.725101	0.725807	1	0.386749	0.627559	0.970249	0.559872	0.648855	0.665237	0.998874	0.365071	0.614406	0.947325
PBMC	LIGER	3	0.680069	0.725101	0.725807	1	0.386749	0.627697	0.969882	0.559872	0.648855	0.665237	0.998874	0.365071	0.614153	0.945894
PBMC	LIGER	4	0.680069	0.725101	0.725807	1	0.386749	0.627553	0.969847	0.559872	0.648855	0.665237	0.998874	0.365071	0.61371	0.947238
PBMC	LIGER	5	0.680069	0.725101	0.725807	1	0.386749	0.627989	0.970295	0.559872	0.648855	0.665237	0.998874	0.365071	0.614429	0.947511
PBMC	FastMNN	1	0.628555	0.647087	0.668685	0.999614	0.327315	0.602501	0.937741	0.44664	0.573863	0.600476	0.983461	0.310166	0.573504	0.915805
PBMC	FastMNN	2	0.636242	0.677423	0.688446	0.999614	0.327243	0.602276	0.938026	0.452302	0.608445	0.624399	0.983381	0.309773	0.573375	0.915947
PBMC	FastMNN	3	0.574815	0.61967	0.647383	0.999612	0.327213	0.602042	0.937434	0.442023	0.566757	0.595841	0.983538	0.309813	0.572148	0.914857
PBMC	FastMNN	4	0.686451	0.66939	0.690194	0.999614	0.327175	0.601378	0.9377	0.556563	0.614231	0.628828	0.983512	0.310115	0.57357	0.915454
PBMC	FastMNN	5	0.589673	0.620757	0.651681	0.999614	0.327266	0.60254	0.937716	0.412242	0.552501	0.596848	0.983405	0.310148	0.572785	0.915793
PBMC	Unintegrated	1	0.660652	0.67164	0.724491	1	0.109208	0.62352	0.963768	0.499222	0.633882	0.680887	0.999079	0.0229592	0.576126	0.915459
PBMC	Unintegrated	2	0.660652	0.67164	0.724491	1	0.109208	0.623361	0.963414	0.499222	0.633882	0.680887	0.999079	0.0229592	0.57513	0.908418
PBMC	Unintegrated	3	0.660652	0.67164	0.724491	1	0.109208	0.623249	0.963766	0.499222	0.633882	0.680887	0.999079	0.0229592	0.575566	0.914271
PBMC	Unintegrated	4	0.660652	0.67164	0.724491	1	0.109208	0.623594	0.963529	0.499222	0.633882	0.680887	0.999079	0.0229592	0.5776	0.912246
PBMC	Unintegrated	5	0.660652	0.67164	0.724491	1	0.109208	0.623377	0.963755	0.499222	0.633882	0.680887	0.999079	0.0229592	0.575509	0.912834
PBMC	Scanorama	1	0.76816	0.781387	0.801893	1	0.3303	0.610859	0.955045	0.611443	0.725706	0.746484	0.999373	0.295259	0.595247	0.925181
PBMC	Scanorama	2	0.76816	0.781387	0.801893	1	0.3303	0.611293	0.955116	0.611443	0.725706	0.746484	0.999373	0.295259	0.596048	0.925262
PBMC	Scanorama	3	0.76816	0.781387	0.801893	1	0.3303	0.611766	0.955758	0.611443	0.725706	0.746484	0.999373	0.295259	0.595929	0.926576
PBMC	Scanorama	4	0.76816	0.781387	0.801893	1	0.3303	0.611365	0.955654	0.611443	0.725706	0.746484	0.999373	0.295259	0.596114	0.926333
PBMC	Scanorama	5	0.76816	0.781387	0.801893	1	0.3303	0.611212	0.955317	0.611443	0.725706	0.746484	0.999373	0.295259	0.595995	0.926072
PBMC	scVI	1	0.772228	0.775144	0.788445	1	0.222554	0.589251	0.961949	0.595595	0.707089	0.725664	0.997702	0.197605	0.570423	0.929585
PBMC	scVI	2	0.681981	0.693371	0.752639	1	0.240063	0.580907	0.965018	0.473498	0.6483	0.676455	0.996373	0.214543	0.563506	0.932242
PBMC	scVI	3	0.768779	0.745205	0.778002	1	0.232872	0.584239	0.96107	0.589746	0.669504	0.701307	0.996812	0.208814	0.567205	0.927895
PBMC	scVI	4	0.744846	0.749768	0.767102	1	0.239031	0.580512	0.962901	0.574966	0.683735	0.704142	0.996551	0.211474	0.564744	0.932535
PBMC	scVI	5	0.825778	0.774623	0.786426	1	0.225395	0.578169	0.959574	0.666588	0.704415	0.725623	0.995449	0.2038	0.560272	0.926419

## Sheet: S2
Factor 1	Factor 2	Factor 3	Factor 4	Factor 5	Factor 6	Factor 7	Factor 8	Factor 9	Factor 10	Factor 11	Factor 12	Factor 13	Factor 14	Factor 15
THEMIS	AC245041.2	NHSL2	AL162414.1	COL25A1	ADAMTS16	NRG3	CADM2	TIMP1	FGF10	KCNMB2-AS1	RYR3	GYG2	NKAIN2	CLEC12A
SKAP1	KCTD8	ARHGAP28	CD163L1	TEX41	ADAMTSL1	RELN	BTNL9	SERPING1	SPOCK1	FERMT1	IL1R1	PPP2R1B	RNF144B	ZNF804A
CD96	WWC1	CDH11	BCAT1	RCAN2	GALNT17	MMRN1	PRAG1	RARRES2	GPC3	AC005699.1	FRMPD4	AC007529.2	IFI44L	NCEH1
PRKCB	DPP6	ROR2	F13A1	NTRK3	LINC02511	CCL21	ABLIM3	SLPI	KCND2	LINC00710	TACR1	ACVR1C	ERC1	LTA4H
EVL	EXTL3	NINL	KHDRBS2	ADGRL3	MFAP5	AL357507.1	KIAA1217	MSLN	C6	TMEFF2	MMP16	AL356479.1	PCSK5	ITGAM
ANK3	HHIP	BMPR1B	SCN9A	ACTA2	DCLK1	MGAT4C	DACH1	S100A6	FMO2	SLC8A1-AS1	MYRIP	MLXIPL	PDGFD	KYNU
ANKRD44	COBL	GLI3	AC010127.1	THSD7B	TNXB	MPP7	SEC14L1	PLA2G2A	DPT	AL357055.3	TLL1	SPATA9	LINC01695	DMXL2
EML4	PTPRT	KIF21A	LGMN	RGS6	SDC2	PTPRE	MGLL	RPS21	BMPER	GNGT1	TMTC2	GPAM	VEGFC	ARHGAP22
SMCHD1	PEX5L	PDZRN4	HRH1	RGS5	SDK1	LINC02147	ADGRF5	RPS12	ALDH1A1	DPYD-AS1	LYST	KCNIP2-AS1	ITSN2	CYP27A1
RIPOR2	KCNH5	DCBLD2	MAMDC2	CLMN	FBLN1	NRP2	FLT1	HP	FGF7	AL035427.1	AQP1	SLC25A16	STK38L	CYBB
PDE7A	PHLPP2	MAGI3	LIX1-AS1	CARMN	ADAMTS5	PIEZO2	RASGRF2	RPS16	CYP7B1	AC103853.1	CCSER1	PECR	ADAMTS1	RASGEF1B
ARHGAP15	LRP2	CASC15	MS4A4A	KCNAB1	PTPRD	ITGA9	HIPK2	RPL28	AC109779.1	MAK	PIK3C2A	KLB	FNIP2	MARCO
TNIK	SLC39A8	WT1	DAB2	PDE1C	CNTN4	STON2	ADGRL4	MT-ND4L	SRPX	AC090579.1	HIPK3	LINC00598	ELN	MAP3K8
PIP4K2A	SGCZ	TRPM3	CCDC141	MYH11	FBN1	PPFIBP1	LIPE-AS1	RPL13	ABCA8	AC112206.2	POSTN	PLIN1	CC2D2B	RAB10
PACS1	DIAPH3	IGF2BP2	MTSS1	CDH6	CYP1B1-AS1	ZDHHC14	LRCH1	TPT1	FBLN5	AC117834.1	PKP4	SIK2	PPA1	FPR3
CDC42SE2	ANXA8L1	LONRF1	WWP1	LMOD1	FREM1	STOX2	CDH13	HSP90AA1	C8orf34	THSD4-AS1	MKL2	PRKAR2B	MAP4	GRB2
PTPRC	DPYS	ZC4H2	PDGFC	ADGRB3	LINC01358	MAP4K5	MCC	RPS19	C7	AC103876.1	GULP1	GPD1	LINC01697	VSIG4
STK17B	PTPRQ	ZMYM4	MRC1	IL1RAPL1	ROBO2	NXN	RIN2	TMSB4X	ABCA9-AS1	AP002812.2	BMPR2	PNPLA2	CGNL1	DRAM1
AOAH	ADAMTS3	CNOT4	C20orf194	LINC02237	FSTL1	SNTG2	A2M	S100A10	ABCA10	C6orf10	DNM3	AC008840.1	ENPP2	FMNL2
LRBA	DOCK3	METTL15	DIP2B	CACNA1C	CPQ	TFPI	ZHX3	RPS4X	SVEP1	AC068587.6	ZNF385D	SLC19A3	PDCD4	ZNF438
RABGAP1L	WWC2	RALGPS2	MAMDC2-AS1	LINC01088	COL6A3	VAV3	UACA	C1R	LMO3	SNHG14	ADGRG6	CIDEC	ARL15	VMP1
PARP8	BCHE	PTPN13	SNX6	SYNPO2	UST	AC011287.1	CDR2	RPL37	ABCA9	TMLHE-AS1	SESN3	AC006387.1	CMSS1	AL590385.2
DENND1B	FAT3	GXYLT2	SGMS1	AKAP6	PCDH7	TSPAN5	EPAS1	PTMA	LAMC1	ZNF596	CDH23	TRHDE-AS1	SLCO2A1	TET2
DOCK10	PTPRZ1	ATXN2	TTN	PDE3A	SH3PXD2B	AKAP12	ITGA1	RPS14	NOVA1	AC090531.1	CMIP	RDH5	CDC42BPA	MSR1
SIK3	VIPR2	ZNRF3	FOXO3	MAP3K20	SVIL	GPM6A	LMCD1	RPL34	ABCA6	JPX	VCAN	ACSS2	TIPARP	CTSS
MBNL1	BCO2	GLIS3	AFF3	DYNC1I1	LPAR1	SEMA3A	ATP2B4	RPL36	EYA2	Z99289.1	GSE1	CIDEA	PLPP1	TFEC
TNRC6B	NTNG1	ENOX1	ADAP2	PLCL1	FGF14	L3MBTL4	DDAH1	RPL35A	SCN7A	AL359706.1	PECAM1	MARC1	STOM	SAMHD1
TNFAIP8	LINC02232	CACNA2D1	AP2A2	SLCO3A1	GREB1L	SLC22A23	LIPE	RPS8	KAZN	DIAPH2-AS1	NCOA7	ADIPOQ	ARGLU1	SNX24
PTPN4	MUC16	CLDN1	SNX29	INPP4B	PTPRA	KIAA1671	HMCN1	RPS27A	ZRANB2-AS2	LINC01376	ARHGEF3	VKORC1L1	NR4A1	CAB39
KIAA1551	ERBB4	MIR100HG	ITSN1	FRY	ROBO1	IL7	EEPD1	RPS24	PLXNA4	AC131571.1	VWF	AC108062.1	AC024145.1	EIF4G3
CCND3	NEBL	AEBP2	MYO5A	MARK1	GFPT2	PGM5	PALMD	RPL37A	PLPP3	C9orf84	CYYR1	PLA2G16	INSR	LINC00607
FBXW7	MBNL3	NELL1	ME1	DLC1	COL12A1	KLHL4	RAPGEF1	RPL18	AC007388.1	AL356599.1	SH3RF3	PLIN4	FUT8	RNF149
TC2N	FRAS1	SCEL	CR1	RYR2	DDR2	AC007319.1	CD36	RPLP1	APOD	CNGB3	FLI1	ADIPOQ-AS1	GUCY1A3	MGAT1
CASK	STK33	AC016831.1	CTSC	AC012409.2	MEG3	NFAT5	GBE1	RPS13	CHL1	LINC00513	STAT3	MAOA	COBLL1	TMEM165
HERC4	BICDL1	SETD5	NAV2	MAP1B	CREB5	DLGAP2	TACC1	RPL11	LHFPL6	LAMB4	MEF2C-AS1	IRS2	UBA6-AS1	TIAM1
R3HDM2	HAND2-AS1	RNF217	MFHAS1	ROCK2	EBF2	CHST15	ARHGAP29	RPS23	RIMS1	ACSM3	AF241726.2	MMD	CD46	BACH1
PCNX1	BNC1	ZNF462	RGL1	NHS	MSC-AS1	SEMA3D	MYO1E	RPS6	CDADC1	ANGPTL1	ANO2	GABRE	CLIC4	GLUL
KANSL1	LYPD6	ROR1	TNFAIP2	NMD3	DCN	DOCK5	ST6GALNAC3	RPL19	TWIST2	AC096564.1	TGFBR3	ELMOD3	SPTAN1	SKAP2
SOS1	CPA4	SUCLG2-AS1	SLC40A1	NTRK2	MYO9A	SEMA6A	KDR	RPL27A	FAM19A2	AP002518.2	ITGA6	ZNF117	BCL2L14	TAOK3
LINC00540	LINC01725	DIP2C	RBPJ	MAP2	TRERF1	PCCA	EPB41L4A	RPL30	PLAGL1	HMGN3	GRB10	DGKI	TOX	KCNMA1
RUNX1	CACNA2D3	PAMR1	EDA	NR2F2-AS1	IPO9-AS1	RPS6KA2	PLEKHG1	RPS18	ADH1B	KLHL28	ENTPD1	LVRN	EXT1	TET3
ARAP2	IQCA1	GATA6	MAN1A1	EPS8	TENM4	LINC01515	ANO2	RPLP2	LRRC4C	TAF1D	CALCRL	TENM3	PHACTR4	NLK
PCED1B	SLC44A5	SRSF11	SESN1	ANK2	ARHGAP20	LINC01197	CCNY	MT1E	PCDH9	AP002336.2	LIFR	DIRC3	PODXL	SMAP2
BIRC6	KCNB1	SRGAP1	SNX2	PPP1R12A	COL1A2	TANC2	EMCN	RPL26	XYLT1	SRSF5	RALGAPA2	ABCD2	SULF1	JAK2
PHC3	PIP5K1B	MEIS1	STARD13	DMD	ADAMTSL3	ANGPT2	FABP4	MT-ND4	USP53	ANKUB1	IRAK3	PDE3B	B4GALT1	RBM47
ASH1L	COL21A1	ZFHX4	APPL2	TBC1D1	AL445426.1	PLCE1	LPAR6	MT-CO3	PIK3R1	AL157938.2	RFX3	AQP7	ENTPD1-AS1	APBB1IP
WIPF1	ADGRD1	ARHGAP32	ABCA1	ROCK1	CCDC39	PDE1A	FGD4	MT-ND1	LEPR	AC027018.1	TMTC1	MME	LIMCH1	CCDC88A
ATF7IP	FAM160A1	AKAP9	SLC9A9	GRK5	RUFY3	ZNF521	PPARG	CST3	COL15A1	N4BP2L2	ST6GAL1	PLIN5	AP002989.1	CTSB
FYN	NPNT	CLASP1	SIGLEC1	CCDC3	LRFN5	NHSL1	RAPGEF2	LGALS1	ANGPT1	ZRANB2	SGO1-AS1	ATP1A2	SAMD12	LYN
CEP128	AC098617.1	GRIP1	ATP8B4	NBEAL1	LUM	JMJD1C	OSBPL1A	MT-ND3	PTEN	ERAP1	FAM155A	GCLC	FN1	COL4A3BP
MAP3K5	TXNRD1	CMYA5	MS4A4E	CTNNA3	COL1A1	FOXP2	RAPGEF5	MT-ND5	VGLL3	AC023590.1	PLCB4	PCK1	LRIG1	MERTK
CHST11	NLGN1	TFDP2	ATG7	IGFBP7	IGFBP6	AP001021.2	ITGA6	MT-ATP6	PTPRS	CENPP	CADPS2	AC138123.2	NEDD4L	SRGAP2
RNF213	ITGB8	SERINC5	SPRED1	IGFBP5	NEGR1	MTUS1	FRYL	CD63	TRHDE	RAP2C-AS1	PDE7B	AC084871.1	GMDS-AS1	NPL
PPM1B	DSE	DAB1	IQGAP2	VCL	TRIO	PTCHD4	FGF13	MT-CYB	BOC	AC004594.1	MYOF	C2CD2	ITPR2	TPK1
ARID2	CNKSR2	AFF4	GSAP	ITGA7	TPST1	STXBP6	VWF	C3	ADAMTS12	AC107021.1	GNAQ	PFKFB3	LTBP4	TBXAS1
FAM172A	FGF1	SLC44A1	FMN1	UNC5C	LAMA2	RAB11FIP3	MEOX2	RPL32	NEGR1	ZBTB20-AS5	EMCN	ASPH	STX12	ZDHHC20
STK10	AC027288.3	INVS	ARHGAP5	COL14A1	SEC31A	KALRN	NAV1	MT-ND2	ARHGEF26	KANSL1L	HSPG2	ACSL1	GMDS	PLEK
EPB41	CLEC16A	RBFOX1	MGAT5	PTPRK	COL14A1	EFNA5	PTPRM	MT-CO2	RBMS3	DLEU1	PREX2	HOOK2	PPP1R9A	MYO9B
FYB1	DEPTOR	DIAPH2	SLCO2B1	COL4A5	GAS7	APP	AC018616.1	MT-CO1	CRISPLD2	ABI2	TPD52L1	RTN3	MET	ABR
STK39	IL16	ACSL4	CPM	AMOTL1	ZEB1	SNCA	CYYR1	KRT19	LAMA2	SOD2	AASS	SLC7A6	AC022217.3	SHTN1
SH3KBP1	SLMAP	ZNF148	SELENOP	NEXN	AHI1	CHKA	ZNF608	ACTB	MITF	DLGAP1	RAPGEF4	SLC1A3	ANKRD33B	LARP4
TTC17	C5orf42	SGCD	TMCC1	PDE1A	CD34	MAP3K1	AC005550.3	MTRNR2L1	PID1	ST3GAL6	NAMPT	CDH20	MSRB3	SYK
CDK13	AC068051.1	STXBP5	EPS15	DSTN	ADD3	FAM107B	CACHD1	TFPI2	RHOBTB3	FAM227B	MCU	PALM2-AKAP2	SMURF2	ABCC5
PRRC2C	GYPA	MED13L	DISC1	CALD1	COL6A2	LYVE1	MAGI1	ITLN1	TLN2	LOXHD1	SEMA6A	SLTM	SRGN	TTC7A
CTAGE5	THSD4	POGZ	MS4A6A	CACNB2	SMG6	AGBL4	TPST1	MGP	SPATA6	FBXL13	AL359220.1	MEST	SYT1	ACAP2
ATM	PATJ	DGKH	RNF150	NCALD	NAV1	NUMB	AC058822.1	ADIRF	TNRC6A	EYS	ARHGAP31	UPP2	YBX3	TMEM117
LNPEP	AC016205.1	KIAA1328	SLC38A6	ARHGAP42	SLIT2	ST6GALNAC3	ABCB1	FTH1	SH3D19	LINC01798	SH3BP5	MGEA5	PTPN14	EVI5
ARHGAP25	PRKD1	HS2ST1	FKBP5	ADAMTS9-AS2	GSN	BMP2K	LMCD1-AS1	FTL	GFRA1	CGGBP1	ERG	LGR4	LIMA1	RAB31
NSD1	KCNT2	SENP6	FGF13	LPP	PCNX2	DLG1	ABLIM1	OGN	MAP4K3	RBM39	ENTPD1-AS1	PYGL	PTPRB	MANBA
OSBPL3	ARFGEF3	LINC02360	FAM20A	PRKG1	CBLB	COLEC12	TCF4	AHNAK	FOXP2	KCNIP4	RNF115	TMEM164	CYR61	RNF130
DIAPH1	SLC28A3	SPON1	LINC01266	GUCY1A3	DNM1	LYN	SASH1	TMSB10	MBNL2	FTX	NR3C2	SORBS1	FLNB	RIN3
GNG2	AC134511.1	MAP4K4	CD163	PHLDB2	COL6A1	PKHD1L1	COL15A1	ITM2B	OSMR	CYSTM1	ABLIM1	H2AFY2	CFH	VPS8
EPC1	CRIM1	BOC	PAPD4	RASAL2	ARHGAP21	SYT1	TSC22D1	B2M	SEPT11	AC011092.2	MCTP1	AL139383.1	ENTPD1	LYZ
USP15	CAMKMT	PTCHD4	CMKLR1	SPRY4-AS1	NAALADL2	PDE4B	MECOM	VIM	RUNX1T1	LUC7L3	ATP8A1	LRP1B	PDE10A	PIK3R5
FNBP1	AMMECR1	ALDH1A3	ABCC5	BCAS3	AUTS2	PLSCR4	ADAMTS9	ANXA1	NNMT	SRSF7	IL6ST	DGAT2	PTPRG	CMKLR1
PAN3	BBS9	MUM1L1	ARHGAP24	RBPMS	SNED1	UGP2	ID1	MT2A	CRYBG3	AC012404.1	SPARCL1	PTGER3	PDLIM5	SH3BGRL
SP100	CDON	RBM6	WDFY2	HSDL2	PRRX1	GALNT18	KCNQ1OT1	APLP2	NPY1R	RBMS3-AS2	TSC22D3	SLC7A6OS	NEK7	BMP2K
RPS6KA3	RASSF8	ATRNL1	FRMD4B	HIP1	EGFR	CTDSPL	LPL	HAS1	ADAMTSL3	TRIM13	ZNF521	AC012349.1	SAMD4A	SNX13
TOX	RNLS	AC134511.1	NPL	ITIH5	PAMR1	EFEMP1	RB1	TMX4	MOB3B	SPRY1	SLCO2A1	ANO6	RALGAPA1	PTPRJ
RAP1A	SMOC2	SUCO	SYK	LTBP1	PSD3	DOCK9	AFDN	SCD	TBC1D4	LRRTM3	LDB2	LINC00968	EXOC6	UBASH3B
ZNF292	SLC4A4	PTGIS	WDFY3	AC019197.1	GPC6	FRMD6	COL4A1	PSAP	SPECC1	AP001011.1	PTPRB	BCL2L13	SOX5	ADK
BCL2	AC092691.1	NEO1	MANBA	PPM1L	MIR99AHG	MAGI1	NRP1	C1QA	LRFN5	AC006059.1	SEMA6D	ACACB	HNRNPA2B1	CCNL1
ARID4B	SOX6	SRRM2	PEAK1	SPECC1	SMURF2	CALCRL	GNAI1	C1S	PDZRN3	RAB11A	TMEM135	ACSS3	ATP1B3	MS4A6A
UBASH3B	DPP4	SLC16A1-AS1	STARD13-AS	LARGE1	CLDN11	PCLO	ARHGAP31	TM4SF1	RFTN1	AP001831.1	ETV6	SLC16A7	ADAMTSL4-AS1	CD163
SMARCA2	LAMB1	USP47	RBM47	PDE5A	VPS13B	PRKAG2	WNK1	C1QB	SBF2	CERS3-AS1	GMDS	USP33	FAT4	FCHO2
ASCC3	ATRNL1	PCM1	HNMT	UGGT2	PLAGL1	RAPGEF4	CHSY3	HBB	FAM214A	TSHR	CD74	IDH1	CAV1	ZFP36
FAM49B	SLC41A2	RASSF8	ZSWIM6	TPM1	COL3A1	GAB1	CAPN2	ID4	DHRS3	PDXDC1	EVA1C	ABHD5	PELI1	ITFG1
DOCK8	SEMA6D	DTNA	TLE4	ANGPT1	CHD9	PDE7B	SYNE1	HLA-A	IRS1	TENM2	ADGRL2	LPL	PRELID2	ARHGAP25
FBXL17	MPP6	MAPK8	AP000311.1	PTEN	VCAN	TGFBR2	ENPP2	CCDC80	MAML2	AC097376.2	HLA-DPA1	IRS1	MKL1	RNF13
BPTF	FAM153B	ADGRA3	FCHSD2	ARHGAP10	MIR4435-2HG	DENND4A	DOCK1	RNASE1	FTO	RAPH1	ABCB1	CAT	MECOM	MS4A4E
MYCBP2	RRAS2	FARS2	EMB	PALLD	MEDAG	SASH1	PLXNA2	SAA1	DYNC2H1	RSRP1	B4GALT6	AC002066.1	JUN	SAMSN1
DENND4A	NEO1	DENND4C	PER3	SH3RF1	PBX3	PRKCE	COL4A2	CLU	PLEKHH2	RNPC3	PPP2R5A	PCDH9-AS2	ARHGAP20	CTSZ
CCSER2	PROS1	SH3GLB1	TBXAS1	ITGA1	KANK1	MARCH3	LDB2	HLA-C	ITIH5	CBR4	PRKCH	TMEM132C	PDZD2	CLIP4
AAK1	EZR	MON2	RNF130	AC069208.1	KAZN	TANC1	DGKH	APOE	CHD9	ALOX15	GPAT3	CTIF	PTGIS	FOS
NCOR1	GRIK2	BCAR3	PLEK	EBF2	CHL1	ASAP1	C1orf21	HLA-B	PLD1	RNF111	HLA-DRB1	ADIPOR2	SLC4A4	FYB1
ZCCHC7	CTNNA3	ATP11A	TNS3	MEF2C-AS1	STK3	ARHGAP29	TJP1	C1QC	PRICKLE1	HNRNPDL	LXN	ITGA7	MAP2	SLC39A11
ATXN1	SEMA5A	PHF21A	GABRB2	AC002066.1	COL5A2	CABLES1	STXBP6	SPARC	NR3C1	RORA-AS1	EPB41L4A	FERMT2	EVA1C	PIAS1
IQGAP2	CDK14	NF1	TCF12	ANGPTL4	PID1	CEP85L	MEF2C	CD14	LIFR	PPP2R3A	ARFGEF3	HSDL2	HEG1	RSRC1
MBP	ALDH1A2	HIBADH	APBA1	AEBP2	AL109930.1	LIMS1	IPO9-AS1	TXNIP	CCDC102B	RDH10-AS1	MECOM	PXDN	CDH13	CD55
KLF12	MACROD2	ADAMTS17	GNG2	APBB2	PLEKHA5	RAB11A	IQCJ-SCHIP1	CFD	GAB1	ECM2	TGFBR2	GLCCI1	LINC00968	FMN1
VTI1A	GRIP1	ARHGAP42	GOLGA4	RABGAP1	EHBP1	SNCAIP	ADIPOR2	RARRES1	ANTXR2	KCNQ1	FOXP1	G0S2	ATP8B1	CXADR
ST8SIA4	RETREG1	MARK3	HDAC9	LRRTM3	ANTXR1	ADD3	CADPS2	IGFBP6	AGL	NABP1	EXOC6	AC018616.1	ANXA3	MDM2
PIK3R5	ADGRA3	TTC3	CABLES1	CRISPLD2	NOVA1	KDR	KALRN	IGKC	PRICKLE2	CC2D2A	PTPRM	TRHDE	TEAD1	AHCYL2
SLC4A7	ANKS1B	KLHL4	TRPS1	PPP1R12B	C1orf21	PLD1	CAV1	ZFP36	KLHL29	AC087286.2	KLF7	GHR	COL8A1	ZSWIM6
PPP6R3	NELL2	DCAF6	COLEC12	ZEB2	PODN	EPB41L2	SYNE2	CPE	FNDC3B	FILIP1L	ACER3	ELL2	EXOC6B	RFWD2
KMT2E	DPH6	VEGFA	SFMBT2	PAWR	CD55	MYH10	MCU	PRG4	RORA	LINC02360	HLA-DRA	MGST1	ABR	SLC38A6
NCOA2	AP000561.1	FMN2	FHIT	RERG	LRP1	SLC38A2	ANXA3	FOS	CAMK2D	PDE5A	ALCAM	LIPE	THSD7A	TPRG1
PLCL2	IL18	CDK6	CHN2	POSTN	DOCK4	SBF2	SPTBN1	ALDH2	VLDLR-AS1	PUM3	ADGRL4	UGP2	AC012349.1	CHST15
UBR2	SUCO	PAPPA	LDLRAD4	LHFPL6	PAM	EXOC6	GALNT18	LYZ	IMMP2L	SHPRH	AC005550.3	TNS1	KLF6	CERS6
ARFGEF1	RERG	CAPN2	RNF13	LMO4	SESTD1	DYNC1I1	ST8SIA4	JUNB	SLC24A3	AP001021.2	CEP112	LINC01481	PTPRJ	SSH2
DOCK2	ANKRD33B	SMG6	SPATS2L	PIP5K1B	MARCH3	ANKS1A	DAPK2	HLA-DRA	SETBP1	NGF	LINC01876	ANGPTL4	AAK1	HLA-DPB1
RAB8B	CLIC5	DDX17	OSBPL3	KIF13A	LTBP4	TBC1D8	TMEM2	ZFP36L1	PCDH9-AS2	NEK11	FLNB	LNPEP	CDR2	RTN1
USP34	ATP2B1	ZNF638	SNX13	CPE	EBF1	DENND2A	PDE10A	CYR61	SNED1	AL138828.1	APP	GLRX	WSB1	USP15
SMYD3	RNF24	CUX1	RTN1	CHSY3	NCAM2	NR2F1-AS1	NLK	FCGRT	NID1	PNISR	NKTR	TMEM135	IGF1R	SIGLEC1
SSH2	PAWR	ZNF292	MERTK	GPC6	CFD	PTPN14	ANKH	SELENOP	NCAM2	RBMS3-AS3	RASAL2	GBE1	USP53	AP3B1
CEP85L	LINC01133	FAM155A	PELI1	TRAF3IP2-AS1	SLC24A3	SLCO2B1	PKP4	MALAT1	SLIT3	FAM153B	CD34	AC004160.1	PLXNA2	FAM49B
SFMBT2	AGBL4	ARID1B	PDK4	ZFHX3	DST	ERRFI1	DENND2A	CTSZ	FGF14	ST3GAL5	LRRFIP1	GNAI1	LRRFIP1	ATP8B4
ELF1	CALB2	GRIK2	IGF1	FRMD4A	SNX9	AFDN	PITPNC1	ANXA2	FRMD6	SPRY4-AS1	COMMD10	CLSTN2	ZNF704	NSMCE2
ERBIN	ADAMTS17	ARHGAP44	SPIDR	GTDC1	CAMK1D	DPP4	CRYBG3	COL1A1	ANK2	NFKBIZ	AL360091.3	CLMP	C9orf3	CPVL
GLCCI1	GFRA1	FTO	VPS8	AC098829.1	DHRS3	EPS15	ERG	BTG1	DDR2	CCBE1	MEOX2	ALDH2	TJP1	DENND1A
CDKAL1	AOX1	NELL2	CTTNBP2	POGZ	PRKCA	C1orf21	CCSER1	SQSTM1	MIPOL1	DPH6-AS1	YBX3	DAPK2	RAPGEF5	DNM1
DYM	ZBTB7C	SGO2	ZFHX3	ARHGAP6	SYNE1	CCDC102B	HLA-E	CALB2	MGST1	MUM1L1	SYNE2	AL365295.1	ANKRD28	WDR70
DYRK1A	DSCAML1	ESYT2	LYVE1	MIR646HG	RBMS1	NID1	SPARCL1	IGFBP5	CLSTN2	NR2F1	ANKRD28	PPP2R5A	ITGB1	NAMPT
PCNX2	PRG4	BTBD9	TET3	TNS1	SCN7A	KLF6	DLEU2	G0S2	PAPPA	AC058822.1	FOXO1	UVRAG	MCL1	PPM1L
SCLT1	GABRB2	PKD2	FCGRT	ADGRL2	KLHL29	MSRB3	CPNE8	CTSB	PRRX1	RASA1	ELMO1	PLOD2	DSTN	ABL1
CBLB	CLIP4	ZNF609	SLC4A7	PTPRG	DPYSL3	COMMD10	UVRAG	HLA-DPB1	GHR	MNAT1	AL365295.1	AP001528.2	TLE1	ACSL4
TMEM131L	SORBS2	MPP6	CPVL	COL21A1	ABL1	EXOC4	PEAK1	JUN	AL445426.1	AL109930.1	KMT2E	RNPC3	TTC28	IQGAP1
CD44	APBA1	ZNF704	SH3BGRL	SOX5	RORA	UTRN	HSPG2	ALDH1A3	MIR99AHG	RARRES1	ID1	RHOBTB3	DDX5	MARCH1
PRKCH	CACNB2	YAP1	CPED1	SLC38A2	PALLD	PLEKHG1	FZD4	TSC22D3	HP1BP3	NEXN	ZNF280D	AC019197.1	PLCB4	CD14
TAOK3	FBXL2	GPATCH8	FAM13A	FAM110B	CCDC80	ERG	CLIC5	CD74	AC009271.1	AP002989.1	PGM5	PPP1R12B	COMMD1	CHN2
RICTOR	MARCH1	ATRX	SNX9	IMMP2L	DSCAML1	MIR4435-2HG	NCALD	LRP1	MAPK10	SAT1	SNTG2	BCL2	MAST4	RREB1
NIPBL	PHACTR1	KIAA1109	SMAP2	SEMA5A	GRK5	PPP1R9A	NBEA	HLA-DRB1	IGF1	SGO2	LINC01697	FZD4	RRAS2	JUNB
HNRNPH1	MEDAG	ZFPM2	ITPR2	PRRX1	NTM	MACF1	CEP112	HLA-DPA1	ARHGAP24	TMEM241	FZD4	CCDC3	AC023590.1	ZFAND5
SUPT3H	PLCE1	AF117829.1	FCHO2	GAREM1	PHLPP1	NKTR	LEPR	COL6A1	C1QTNF7	SLC16A1-AS1	MLLT3	PTPRF	EEA1	MOB3B
BTBD9	ARHGAP44	MCTP2	NRP1	STK39	ABCA10	CSGALNACT1	PREX2	COL6A2	LINC01481	C11orf58	AMOTL1	RTN4	TRA2A	STX12
RFTN1	MYO1D	DPH6-AS1	SAMSN1	TMEM131L	FER	SYN3	PHACTR2	LUM	DAPK2	ANGPT2	CLU	AC098829.1	AFF1	CHST11
CCDC91	SEMA3C	AASS	ANKS1A	SYN3	AC009271.1	PTBP2	PLPP3	ZFP36L2	EGFR	IL18	DOCK9	PCDH9	RICTOR	FGD4
PPP3CC	TPM1	CCBE1	ARHGAP18	PICALM	TRAF3IP2-AS1	GNG12-AS1	EEF2K	HLA-E	ARHGEF28	LXN	PALLD	RAB2A	PARP14	FOXN2
SNTB1	LSAMP	NGF	LINC02456	KCNMA1	TSHZ2	TLE1	ACACB	RTN4	ENOX1	HMGB1	PRKAG2	CAV2	DOCK1	RAP1B
ADAMTSL4-AS1	VGLL3	ANKS1B	MIR646HG	ZBTB7C	SEMA3C	AL138828.1	SYN3	CLDN1	ZBTB16	ARMCX4	ABHD5	NPY1R	BACH2	CYTH1
AC010894.3	PVT1	UBR5	ATM	LINC01197	CACNA2D3	RALGAPA2	RALGAPA2	MCL1	COL12A1	FEZ2	LINC01695	AL360091.3	IQCJ-SCHIP1	ATG7
ELP4	RIMS1	PARD3	TFEC	CLSTN2	AC092691.1	GLIS3	MGAT1	APOD	ZNF385D	HS2ST1	ELF2	PHLDB2	CEP85L	SCAF11
EMB	CUX1	PRICKLE1	SHTN1	SETBP1	BMPR1A	ACSM3	PTPRB	PTPRF	TCF4	WSB1	RAD51B	TLN2	SP100	C1QC
VPS13C	CMYA5	ANKRD17	SUMF1	PARD3	NCOA1	ZMYND8	RASAL2	CAV1	DLG2	AZI2	LMCD1	GPC6	ZDHHC20	DIAPH1
COG5	FMN2	TRPC1	QKI	MT2A	TPRG1	PHLDB2	DEPTOR	PROCR	SMOC2	LMO4	PROS1	TLE1	AF117829.1	MIR646HG
BBX	MARK3	SLC28A3	AGFG1	COL5A2	ZNF638	REV3L	CAT	EZR	WWOX	SHISA6	FLT1	NRIP1	FILIP1L	KDM2A
FNDC3A	KANK1	ARID4B	PSD3	SSBP2	SHISA6	COL4A3BP	FLNB	PODN	BICC1	TRPC1	KTN1	PCOLCE2	MAP4K3	SCLT1
BACH2	USP25	COMMD1	DENND1A	CACNA2D1	ZRANB2-AS2	ARHGEF12	CDK6	ID1	SNTB1	TRPM3	PALMD	NTM	RAPGEF2	EPSTI1
ZNF407	MET	TBCK	DOCK2	SHPRH	PLXDC2	ANKH	PRKCE	GSN	ARHGAP10	RALGPS2	AFF1	COL4A1	TBC1D8	DOCK2
CAST	NAV3	DENND5B	AKAP13	PALM2-AKAP2	ZBTB20	DPYSL3	AGAP1	CPA4	PREX2	ALDH1A2	LIMS1	CRLS1	RAB2A	HNMT
PITPNC1	ANXA3	PLOD2	ZCCHC11	VPS13D	ALDH1A3	CTNNA1	PLCB1	DSTN	TBL1XR1	MALAT1	AL138828.1	PRICKLE2	TANC1	PSAP
APBB1IP	MCTP2	ARHGAP21	GNG12-AS1	TIMP3	UGGT2	PDXDC1	KCNQ1	GLUL	CNKSR2	SPON1	ANKS1A	LIPE-AS1	CDADC1	ETV6
STX8	PAPSS2	CAMK2D	EEF2K	ANTXR1	SGCD	SCAPER	TPD52L1	COL1A2	FBXL7	PHF14	AHCYL2	FAM13A	TANC2	CD44
PHIP	ARHGAP18	RYR2	CARMIL1	TCF7L1	CLMP	PLIN5	AP001528.2	LTBP4	SAMD4A	CCDC18-AS1	DOCK4	PTPRS	NBEA	WDFY2
KDM2A	HEG1	BRAF	RAB31	CDH20	BICC1	IGF1	MCTP1	DCN	PLEKHA5	ZFP36L2	PHACTR2	AL359220.1	CCSER2	STK10
HELZ	GLS	ATF7IP2	MEF2A	KTN1	VPS13D	FAF1	CD34	COL3A1	BCL2L13	CFI	AKT3	WDPCP	ATP8A1	GAS7
FAF1	RASSF3	JAZF1	FNBP1	CRIM1	FBXL7	AP003086.2	ZBTB16	ATP1B3	PXDN	USP34	BAZ2B	B4GALT6	FRYL	MEF2A
ZHX2	LAMA4	PDE10A	MAN1C1	NPNT	ERRFI1	PPP3CA	ARHGEF12	SPRY1	HIBADH	CRLS1	THSD7A	GREB1L	PCDH7	GPCPD1
ZMYND8	PDE8B	SLC41A2	PIAS1	CASC15	MLLT3	TIMP3	DIAPH2	CFI	RNF150	INTS6	PTK2	LIMS1	DENND5B	GSAP
XYLT1	DANT2	TRA2A	THRB	APOE	SETBP1	CCDC88A	KIAA1109	FN1	PTBP2	ATP8B1	OSMR	COL4A2	NEBL	PAPD4
ATP8A1	MAGI2	COL8A1	GAB2	SORBS2	RAP1B	NR2F2-AS1	PHACTR1	EFEMP1	NAALADL2	EPC1	CFI	TCF7L2	SCMH1	CR1
CYTH1	MBP	RAB11FIP3	SNCA	EBF1	EEA1	TMEM241	DOCK9	MEST	ROBO2	AP000311.1	PLXNA4	DENND5B	ACER3	SCFD2
TANK	BCAR3	MAP3K1	TBC1D22A	MIR4435-2HG	BBS9	TLL1	TIMP3	PODXL	TCF7L1	GNG12-AS1	SUPT3H	HIVEP3	KLF7	ELF1
USP47	PCLO	CLDN11	RREB1	SHISA6	STXBP6	GMDS-AS1	MAP4K4	SCEL	EHBP1	CLDN11	MYO1E	NR3C1	TSC22D1	AGFG1
CAMKMT	DAPK1	MID1	PLCL2	PRKCA	NAV3	ST3GAL6	MAP4K3	PCOLCE2	GLRX	PCOLCE2	FRYL	PKN2	AGO3	SLC25A13
CEP350	PKHD1L1	CFI	VPS13C	MSC-AS1	LTBP1	GLS	MEF2A	EMP1	SLC25A13	AC022217.3	MET	FAM69A	TM4SF1	PDK4
XKR6	SCEL	KMT2C	MSR1	FGF1	DENND2A	NR2F1	RIN3	NR4A1	AF241726.2	WDPCP	TACC1	ZBTB16	ABI3BP	RNF213
SCAF11	LINC01515	TMEM132C	NRIP1	FIGN	KLF12	AC092839.1	AC092839.1	SOD2	TC2N	GYPA	APBB2	MAPK10	BMPR2	RAB8B
TRERF1	FLRT2	DPYSL3	AL590385.2	MYO1D	PRSS23	AC019197.1	TGFBR2	PPA1	LARGE1	LMCD1-AS1	LRIG1	DMD	CLU	ZEB2
STXBP5	GPHN	OXR1	SLC22A23	SPARC	CCDC102B	CTTNBP2	ELMO1	DGAT2	ECM2	IL7	GPCPD1	ITGB1	GAB2	CEP350
JARID2	DAB1	TSHZ2	RUNX1	NID1	ZFHX4	IL6ST	PPP3CA	NR2F1	APPBP2	AOX1	RAPGEF5	AGL	TMEM165	CAMK1D
ALCAM	VGLL4	BBX	TBC1D4	MAPK10	SEPT11	GAB2	CFLAR	SAT1	SGCD	DANT2	CSGALNACT1	MDFIC	RABGAP1	ANKH
NCALD	PARD3B	ERBIN	ACAP2	ADGRF5	CC2D2A	MDFIC	AQP7	SON	LINC02456	AC092839.1	CCND3	GSE1	SPECC1	RBPJ
FAM107B	DYNC2H1	PLSCR4	SAT1	MEF2C	ABI3BP	THSD7A	TCF7L1	ALOX15	UNC5C	AP003086.2	HLA-DPB1	CFLAR	EPAS1	JARID2
INTS6	VLDLR-AS1	RBFOX2	DTNA	MKLN1	RAB8B	CREB5	ELP4	FABP4	FIGN	FBXL2	FAT4	TPRG1	PSD3	PICALM
CLASP1	SOS2	PVT1	CYTH1	SORBS1	ADGRD1	FRMD4B	PHLPP1	LINC01133	CCBE1	BCL2L14	CFLAR	YAP1	PTK2	NUMB
HERC1	MPDZ	RALGAPA1	EVI5	TSC22D1	ABCA9	RSRP1	TMTC1	MUM1L1	FAM227B	MIR100HG	EPB41L3	TENM4	AGFG1	PAPSS2
PCM1	ARHGAP32	MARCH3	CCDC91	SNTB1	VEGFA	RERE	PECAM1	SGO2	COL6A3	AP000561.1	CPNE8	UBR3	MLLT3	HLA-DRB1
NCOA3	FIGN	PRELID2	FRMD4A	CD44	SRPK2	LINC02456	FCHSD2	VEGFA	AZI2	PLEKHH2	PDLIM5	LRIG1	HIP1	TRPS1
INPP4B	FER	BPTF	SDCCAG8	MSRB3	FLRT2	MGAT5	UTRN	CTSS	SSBP2	AC008014.1	TIAM1	AC093110.1	DLG1	PARP14
SAMSN1	RBFOX1	CDKAL1	TSHR	C1QTNF7	ANTXR2	GPAT3	JARID2	SLC38A2	EPB41L3	SON	HEG1	PDZRN3	RNF19A	COG5
MDFIC	ADGRG6	PHLPP1	KCNMA1	ITGB1	WWOX	AC011092.2	IGKC	B4GALT1	UST	CAV2	BTG1	FHL1	FAM19A2	ZMYM2
SLC16A7	ARHGEF28	PPP6R3	PHACTR1	EDA	TWIST2	HNRNPH1	PHACTR4	SRGN	KIAA1328	FAM69A	TPK1	ACYP2	HAS1	GAB2
ATRX	ZNRF3	ZHX2	FER	ATP1A2	STXBP5	SON	ARL15	MARCO	MAN1C1	AC093110.1	HBB	TGFBR3	FHL1	HLA-DPA1
LINC-PINT	SIPA1L1	LINC01798	TBC1D5	BMPR1A	GULP1	TTN	HDAC9	SEMA3C	PARD3	SLC8A1	HDAC8	ECHDC2	AFDN	ATP2B1
AP3B1	CACHD1	CERS3-AS1	SNX24	CCDC102B	SMOC2	CPNE8	GPHN	KTN1	NTRK2	CXADR	DAAM1	NEAT1	PLD1	SRGN
RNF149	WWOX	TTC7A	LPAR6	LUC7L3	AGL	IGF1R	STK10	KLF6	COL5A2	HNRNPA2B1	AC007319.1	MNAT1	XKR6	ZMYND8
RFWD2	UBE2E2	KIAA0368	MEF2C	PPARG	EPB41L2	CD36	KCNB1	CD46	SRSF11	CNOT4	ADAMTS1	EMP1	AC007388.1	QKI
ARHGAP26	ST3GAL5	HDAC8	WDR70	DGKH	CRISPLD2	TMCC1	LIMCH1	SRRM2	MAP3K5	LSAMP	EPAS1	GRK3	GATA6	DOCK5
ZFAND3	COL4A5	PBX1	CNTLN	MAML2	SRGAP1	HIVEP3	MBNL2	MEDAG	DDX17	ECHDC2	PCED1B	FAM214A	UTRN	ZFAND3
ARID1B	ANTXR1	CASK	RAPH1	IQCJ-SCHIP1	LINC01133	PTPRK	QKI	HMGN3	PHF3	PRSS23	SNCAIP	EYS	PIBF1	ELF2
ZCCHC11	NPAS3	KIAA0825	PRKN	CYP7B1	AC012404.1	ANXA2	HERC1	TIMP3	C1S	AC016205.1	TANC1	ZFAND5	FAM20A	PBX3
AP001011.1	BNC2	BNC2	COG5	SPRED1	TRPM7	CCDC141	PTK2	FSTL1	ZHX2	C1QTNF7	HIP1	FIGN	CCDC88A	C1QA
ZMYM2	MEIS2	MYO9A	MED13L	MACROD2	ANXA2	DANT2	FBXL7	MGST1	EPS8	PKD2	ASAP1	TFDP2	NCOA3	CCDC91
FBXO11	CSGALNACT1	AL359915.2	OGFRL1	NPY1R	PRKCE	AUTS2	PARP14	RDH10-AS1	GNAI1	PHC3	LINC02147	GPAT3	FNDC3B	ME1
PHACTR2	DDAH1	COL3A1	ABCA6	SH3KBP1	PTGIS	ABI3BP	DNM3	SPARCL1	INVS	ZCCHC11	IGF2BP2	PPARG	LRP1B	TNS3
KMT2C	C9orf3	EFNA5	MYO9B	CERS6	MKL1	AC012409.2	MTUS1	CNGB3	RBMS3-AS3	SUMF1	PITPNC1	TWIST2	LYPD6	ADAP2
RASSF3	NEK11	BACH2	IQGAP1	SAA1	ZNF280D	IGFBP7	PTPN14	AQP1	SNX9	PAPPA	MAGI1	TMEM131L	AFF4	ALCAM
DDX17	DOCK11	ARMCX4	PDE4D	SLC39A11	TTC3	FLRT2	APP	LAMB1	PNISR	LINC02232	CNTLN	CPM	NKTR	RABGAP1
BCAS3	TNS3	SPATS2L	SRGAP1	DOCK8	PBX1	FAM160A1	CRADD	COL8A1	ZEB1	DCBLD2	SCAPER	FBXL20	BAZ2B	C1QB
ATF7IP2	AC004160.1	PRKCA	JAK2	SLIT3	ABCA9-AS1	LTBP1	GNB1	FBLN1	FAM110B	PKN2	ATP8B1	EEPD1	KLF12	NCOA3
RAD51B	GFPT2	MYH10	GRK3	ARHGEF12	EYA2	PHIP	RPS6KA2	CYBB	AL365295.1	AHI1	IGFBP7	PER3	ATXN2	CD74
MYO9B	TENM2	AFF1	AUTS2	SUPT3H	FRMD6	ROCK2	PRELID2	PCK1	AC012404.1	PPP3CC	LRMDA	SH3KBP1	DPH6	JAZF1
WNK1	C11orf58	LSAMP	DNM1	AC087286.2	ZHX3	DSCAML1	FLI1	YBX3	LMO4	GXYLT2	SRPX	PRKN	MKL2	MITF
PIAS1	SNCA	MACF1	TPK1	COL4A2	KCNIP4	SNX2	MPDZ	ANGPTL4	NBEAL1	CLDN1	TBC1D8	EPB41	MEIS2	DOCK8
RBM6	ATP11A	KAT6B	MARCH1	C9orf3	DLC1	FBXL7	MAPK8	SH3GLB1	NR2F2-AS1	SYT1	ZBTB20	TBC1D4	TCF7L2	PLXDC2
MGAT5	NEDD4L	SEC31A	SRGAP2	AGAP1	UNC5C	CERS6	DPYSL3	ZFAND5	INSR	SLC38A2	AC004594.1	AC069208.1	ANO6	SNX29
RNF19A	PTGER3	SLC24A3	FPR3	LONRF1	LVRN	PRKCH	PAPSS2	ADH1B	ECHDC2	HIBCH	TSHZ2	FRMD4A	AP003086.2	MCL1
DPYD	OGFRL1	VGLL4	LRMDA	ADAMTS12	ESR1	ATP1B3	GRB10	CAV2	ZBTB20	NELL1	PHF14	LIMA1	KIAA1671	SDCCAG8
PIBF1	PLEKHH2	ABI3BP	PID1	ARID5B	PRICKLE1	AC006059.1	LINC00540	VSIG4	CHSY3	ARHGAP44	ARHGAP26	VEGFA	APPBP2	SOS2
ANKRD17	ALOX15	HIPK3	WIPF1	SIPA1L1	AC093110.1	LRRFIP1	HLA-B	AOX1	HNMT	LINC01266	RPS6KA2	LINC02237	CREB5	NEAT1
SIPA1L1	B4GALT6	MEIS2	PFKFB3	CAV2	PROCR	TRIO	DLGAP1	RNF24	DCN	PIBF1	BRAF	CPED1	PTPRM	STX8
AC016831.1	KIAA0825	SLMAP	DSCAML1	ROBO1	SH3D19	SH3D19	REV3L	CFH	LINC-PINT	ESR1	COL15A1	C8orf34	GNAQ	GRK3
PHF21A	NEK7	CDON	ZEB2	ZNF638	FAT4	NRIP1	FOXN3	SLC39A8	TCF7L2	AC068051.1	DOCK11	LIMCH1	MAPK8	MKL1
KIAA0825	LINC01266	RPS6KA3	CHKA	ACSS3	AF117829.1	DDX5	NCOA3	ADAMTS1	VGLL4	MCTP2	TCF4	ARHGEF26	PDE3A	SND1
CCNL1	AL359915.2	IL16	NIPBL	KLHL29	ARHGAP10	HLA-E	STARD13-AS	ANGPTL1	VEGFC	ADAMTS9	SAMD12	HMGB1	ZFAND5	ACSL1
USP25	SLC16A1-AS1	GRK3	OSBPL1A	AFF3	SQSTM1	PAM	ABHD5	PROS1	SPTBN1	KIF21A	BABAM2	GOLGA4	ID4	ZFP36L1
PTPRA	HIVEP3	CGNL1	PARP8	PDZRN3	TNFAIP2	MRC1	JUN	SRSF7	UBR3	PROCR	EEF2K	NTRK2	BBX	SRPK2
FKBP5	MEOX2	SSBP2	FBXO11	KLF12	MYOF	SYNE1	STOM	PLIN4	SESTD1	PDE8B	ITM2B	FABP4	ELF1	RAP1A
VPS13B	EHBP1	RNF24	ZNF117	MOB3B	DLG2	GNB1	HLA-C	AP000561.1	FAM13A	TBC1D8	LINC01725	HIBCH	SETBP1	FN1
AKAP13	NR2F1-AS1	MKLN1	ZNF609	PBX3	CBR4	NFIA	AQP1	NNMT	CDH11	KCNT2	STOX2	RDH10-AS1	ARID5B	FBXW7
ZNF148	EFEMP1	PLEKHA5	NCOA1	UTRN	LINC01088	HMCN1	TRIM13	RBFOX1	ZNF462	BNC1	ADAMTS9	TEAD1	RFX3	SLC8A1
RSRC1	PROCR	ADAMTS9	MITF	AC138123.2	FBXL13	ARHGAP26	ADGRB3	GRIK2	ERRFI1	ARHGAP6	RASSF3	CABLES1	LINC01133	MYO5A
RORA-AS1	NELL1	MAST4	CLASP2	RBFOX2	AC087286.2	FOXO1	C2CD2	VIPR2	ELL2	COL8A1	HDAC9	EBF1	TBC1D1	FBXO11
BICDL1	PLCB1	CTDSPL	FOXN3	ESYT2	ADK	LOXHD1	SERINC5	SLC40A1	KAT6B	SPATA6	HLA-E	ADAMTS12	GNG12-AS1	GNAQ
MBD5	PUM3	PTPRF	RNASE1	DOCK10	FYN	KIAA0825	AP001831.1	SLC28A3	SPRY1	BNC2	NFAT5	RNF111	MYRIP	FHIT
PAM	XKR6	PPP1R12A	CSGALNACT1	ZNF704	ZFPM2	NCOR1	HSD17B4	CYSTM1	ZNF704	CFH	FNIP2	PPM1B	RBFOX2	NRIP1
KAT6B	MNAT1	NABP1	BACH1	MKL2	PTPRS	SPTBN1	CLIC4	SPON1	LPAR1	WT1	CTTNBP2	ITIH5	DOCK9	HERC1
TBL1XR1	PARVA	TMEM2	SESN3	ATXN1	IGFBP5	MLLT10	HLA-A	SULF1	EPB41L2	MEIS2	LDLRAD4	COBLL1	STARD13-AS	SNX2
MLLT3	WDPCP	RBM26	PDE4B	ASAP1	AGAP1	CHSY3	PTPN4	ATP2B1	RNF217	VLDLR-AS1	MIPOL1	PHF3	PPP3CC	CAST
PPP3CA	CERS3-AS1	SLIT2	ACYP2	WDFY2	HMCN1	PEAK1	PLCB4	HEG1	RBPMS	PDZRN4	MTRNR2L1	HELZ	AC069208.1	SPRED1
NEK7	GATA6	AGAP1	GTDC1	CNTN4	DLGAP2	YBX3	LTBP1	LAMA4	CCDC39	RBFOX1	GPM6A	PRSS23	LEPR	ST8SIA4
SND1	NTM	LXN	TMEM241	C11orf58	LINC01481	TC2N	BAZ2B	C11orf58	AC069208.1	DENND4C	ATRX	SOX5	GRB10	LRP1
PATJ	PKD2	ZNF407	NPAS3	RAPGEF2	RAP1A	EMCN	ARHGAP18	MUC16	ZNF280D	CCDC39	RUNX1T1	CHKA	AC027288.3	DENND1B
CAB39	ZNF609	SND1	BMP2K	SCMH1	HNRNPDL	MAN1A1	TANC1	FAM153B	ADAMTS9-AS2	AC005550.3	DISC1	DAAM1	SH3PXD2B	APLP2
RBM39	ZFHX4	PHF3	TMEM117	SOX6	TIPARP	BPTF	ATP1B3	GFPT2	LONRF1	GLRX	PLEKHG1	SH3BP5	TCF7L1	AGO3
RAP1B	SLIT3	IQCA1	RERE	PGM5	NCOA2	MID1	CDC42BPA	OGFRL1	RNLS	SQSTM1	ZNF462	SHISA6	MEG3	RUFY3
GPATCH8	RAB11FIP3	DAPK1	NCOA7	NLGN1	APPL2	C6orf10	AL139383.1	LXN	NR2F1-AS1	ITGB8	MTUS1	SESTD1	PARVA	HLA-DRA
JAZF1	SND1	TSPAN5	HSD17B4	MAMDC2-AS1	SLC44A1	AP2A2	AC004594.1	PDZRN4	TMEM132C	NPAS3	SKAP2	PDE8B	SRPK2	CPNE8
ADK	SLC8A1	APPBP2	AC024145.1	SOS2	ABCA6	SQSTM1	LIFR	ADIPOQ	NR3C2	TXNIP	AC022217.3	MAST4	YAP1	MYOF
FARS2	GPM6A	SEMA5A	IDH1	ADAMTS5	ROR1	AC027018.1	GSN	CRLS1	LUM	H2AFY2	MEF2C	AC092839.1	RPS6KA3	AFF4
BABAM2	ROR1	TTC17	ERBIN	FABP4	ARHGAP42	TRAF3IP2-AS1	GAREM1	PLA2G16	LDB2	AC024145.1	HIBCH	C1QTNF7	CYSTM1	ZFHX3
BRAF	KDR	CNTLN	FLI1	MAML3	NID1	ADAMTS12	SRGN	BNC1	OXR1	IRAK3	DOCK1	CRADD	KANSL1L	UBE2E2
RNF115	MAML3	MEG3	KIAA1551	NR4A1	FGF7	MPDZ	SORBS1	C7	CLMP	FMN2	RERE	EPB41L3	RASGRF2	RB1
SLC39A11	PPP1R9A	ZCCHC7	SNCAIP	LGR4	RUNX1T1	TNS1	PTPRK	LRP2	TRAF3IP2-AS1	MEIS1	AC008014.1	THRB	HLA-C	VTI1A
RIN3	MID1	EZR	GRB2	PLCE1	LAMC1	LDB2	DLEU1	ITGB8	COL4A2	ATF7IP2	AL109930.1	DHRS3	PLEKHG1	DLEU2
ESYT2	FAM69A	NSMCE2	ARHGAP22	FHL1	KIAA0368	MAP1B	ATF7IP2	PNISR	EBF1	STAT3	ARFGEF1	OSBPL1A	JUNB	ABCA1
ITFG1	FAM110B	AOX1	PARP14	FILIP1L	STAG1	UACA	AC010894.3		STK3	TLE4	VGLL4	FOXO1	SESTD1	TMEM164
TBC1D22A	SRRM2	C5orf42	XKR6	CLASP2	CPED1	LYPD6	PRSS23		EEPD1	ZFPM2	PPP3CA	KANK1	PECAM1	VCL
ANKRD28	RGL1	PDE8B	PKN2	PARVA	FBLN5	ZFHX3	PPFIBP1		MAP3K20	RNF19A	CEP128	GAREM1	LTBP1	SLC9A9
ACAP2	LINC01876	FNDC3A	SND1	CTSC	TMTC1	DOCK1	AKT3		SLC44A1	TFDP2	LEPR	ANGPT1	ARHGEF28	KMT2C
SYNE2	TBCK	NFIA	HDAC8	ANK3	AP001528.2	ANTXR2	IFI44L		AL359915.2	GLI3	STOM	NEDD4L	UBR2	HSD17B4
SAMHD1	AGAP1	NFKBIZ	EPSTI1	CBR4	HSPG2	COL4A1	FAT4		COL6A1	GPHN	FGD4	GTDC1	RAPGEF1	LDLRAD4
ADAMTS17	POGZ	AP000561.1	DAPK1	SPARCL1	NGF	BABAM2	MAML3		USP33	CARMIL1	SNED1	MARK1	MYO1E	B4GALT1
AGO3	CTIF	ZMYM2	RFWD2	COL6A2	MME	NCAM2	TXNIP		AC016831.1	LINC00607	VEGFC	AGFG1	MAGI3	TANK
RBM26	IQCJ-SCHIP1	PDE4B	EXOC6B	RUNX1T1	NEK11	LINC01876	FERMT2		FHL1	CC2D2B	LINC-PINT	MDM2	SCAPER	SLC1A3
SRPK2	KRT19	ARHGAP6	NLK	A2M	IL6ST	TBC1D5	CTNNA1		GAREM1	DDX5	SRPK2	RNF150	MYOF	SLCO2B1
RAPGEF1	AC008014.1	FRAS1	AP003086.2	FERMT2	AC069208.1	ARL15	JMJD1C		RNF115	PTPN13	LINC01515	LARP4	PHF14	TBC1D22A
GPCPD1	DCAF6	TCF12	ANKH	FCHSD2	JAZF1	FOXP1	PRKCH		DAAM1	OXR1	FARS2	AGBL4	CTNNA1	DISC1
ROCK1	CXADR	STAG1	RIN3	SEMA6D	HERC4	CDC42SE2	AC007388.1		PUM3	TPD52L1	MT-ND1	PALMD	LINC01876	EXOC4
PTPRJ	NINL	ZNF608	AFF4	ABI2	ZBTB20-AS5	RAP1A	AMOTL1		HMCN1	AL360091.3	CHD9	DOCK11	TRIM13	GNB1
MON2	TEAD1	KCNQ1OT1	AC010894.3	AKT3	FAM172A	WNK1	AL157938.2		NFIA	BCO2		ITSN1	ATRX	GOLGA4
UBR5	SH3RF1	BAZ2B	PIK3R5	SYNE2	RNF115	ZFPM2	PIK3C2A		PRKG1	CD46		UBE2E2	ARID2	CUX1
NCOA1	PDZD2	TJP1	HELZ	COL4A1	ST3GAL5	ELMO1	CMIP		RBMS3-AS2	EPSTI1		LAMA4	TMCC1	ARHGAP18
IQGAP1	FHIT	BMPR1A	AAK1	ARHGAP32	CACNA1C	PLCB4	LRMDA		CBLB	SOX6		ACER3	GNB1	TBC1D1
SESN1	LAMB4	PDLIM5	STON2	DTNA	SDCCAG8	CCDC39	KIAA1671		REV3L	AC010894.3		KIF13A	LYST	SAMD4A
RBMS1	ZC4H2	DYRK1A	PHIP	AC008014.1	DIP2C	COL4A2	B2M		PCSK5	PRKD1		ARHGAP24	HNRNPDL	FNDC3A
CDK6	PTPRF	PODXL	AP3B1	NRP1	TRPC1	PLXNA2	PAM		PER3	PRICKLE1		RAPGEF4	HSD17B4	LYVE1
STAG1	HMGB1	CTNNA1	PAN3	ADIRF	CARMIL1	MYO1D	RAPGEF4		EMP1	MACROD2		AC107021.1	AC097376.2	ARHGAP26
ST6GAL1	FARS2	IGF1R	ABL1	MAMDC2	EPB41L3	AC010894.3	ACER3		AKT3	CACNB2		HSD17B4	WDFY3	LRMDA
SENP6	SULF1	PARVA	PPP3CA	SH3BGRL	SPTBN1	PARD3B	PLPP1		RBMS1	SEMA3D		AP000311.1	KMT2C	MAP3K1
ZDHHC20	COMMD1	NHS	ZNF280D	LGALS1	CD44	PHACTR4	PLXDC2		COL4A1	HOOK2		RRAS2	RBMS3	SPIDR
FOXN2	DOCK4	UBR3	ELMO1	LMO3	GLRX	CRADD	TMSB10		ADGRL2	DAPK1		TMEM241	ARHGAP31	AP2A2
GPAT3	FEZ2	ESR1	ANKUB1	MIPOL1	RHOBTB3	MEF2C	RFX3		PBX1	PTPRZ1		SUCLG2-AS1	CTAGE5	EPB41L3
MCL1	MED13L	ATXN1	EPB41L3	SDK1	PARD3B	COL4A5	ASAP1		AC092691.1	BICC1		PTPN4	C5orf42	HDAC9
TBC1D5	EXT1	MAML3	ASAP1	CD36	TGFBR3	ELF2	PDE4D		TANK	NUMB		ADK	NMD3	LPAR6
MGEA5	DLGAP2	GAREM1	VSIG4	PTK2	SH3RF3	PDE4D	DHRS3		FUT8	MAGI2		DLG1	ARHGAP26	SIPA1L1
GTDC1	AF117829.1	TRPS1	NEAT1	ANGPTL1	CNTLN	NBEAL1	LARGE1		FOXN3	THSD7A		TBL1XR1	AL365295.1	VPS13C
FUT8	DPH6-AS1	SYNPO2	FBXL20	KALRN	RBFOX2	SLC25A13	TPM1		RORA-AS1	PKHD1L1		LMO3	DST	RASSF3
CELF2	SPIDR	FOXP1	DYRK1A	FOXN2	TTC28	AC008014.1	RBMS3-AS2		NAV3	ARGLU1		PDZD2	IQGAP1	DPYD
RASA1	SVEP1	TCF7L2	RB1	ID4	KCNQ1OT1	LRMDA	DOCK4		FAT4	FAM155A		AZI2		PTPRC
HP1BP3	SGO2	MCC	AOAH	COL3A1	NEAT1	APLP2	BCAR3		PDK4	MID1		ABCA1		COMMD10
FBXL20	NFIB	EXOC6B	HERC1	CPED1	MAN1C1	PPP3CC	KLF7		UACA	PLCB1		TNRC6A		DCAF6
ARHGEF3	CPE	AC009271.1	SCAF11	TNRC6A	CCNY	TCF7L1	TTC28		NAV1	RERG		CD36		SNX6
AC068587.6	GXYLT2	FAF1	STK17B	UBE2E2	FERMT2	DST	TENM2		SOX5	CMYA5		MYCBP2		DST
SLC7A6	SLIT2	CARMIL1	DLEU2	ARMCX4	FBXL2		FMO2		PHF21A	SPATS2L		Z99289.1		RAB2A
FOXP1	NNMT	PODN	ELF2	SENP6	C1S		PICALM		DLC1	CPVL		NNMT		COMMD1
SCFD2	ZMYM4	RETREG1	TET2	SDC2	UPP2		RBFOX2		ROBO1	SH3GLB1		IMMP2L		APOE
TMX4	KAT6B	DYM	ZDHHC14	CMSS1	PTPRG		NKTR		CPED1	ZRANB2-AS2		SPTBN1		MCTP1
SMAP2	BICC1	NPAS3	CFLAR	DDAH1	INVS		BMPR2		NR2F1	ARHGAP28		RNLS		ELP4
AMMECR1	TFPI2	ARHGAP5	ST6GAL1	ETV6	AC007319.1		MARC1		NMD3	MAML3		PCED1B		SLC4A7
PICALM	ZNF462	KCNT2	AC087286.2	PTBP2	TTC7A		DST		NFIB	AC098617.1		KCNB1		CTNNA1
CAMK2D	HS2ST1	AC098617.1	DIRC3	MT1E	PRRC2C		ZEB1		MAN1A1	PAMR1		FNDC3B		UVRAG
CMIP	AC009271.1	CDK14	JARID2	ACTB	DYNC2H1		NFIB		ANO6	LINC01876		RREB1		PHF21A
KIAA1109	PLOD2	DAAM1	SERINC5	FTX	CLASP2		AL445426.1		AL139383.1	ATXN2		ECM2		MTSS1
MACF1	NFKBIZ	MUC16	LPAR1	UBR3	INTS6		CNGB3		HERC1	ZC4H2		MID1		NSD1
FOXN3	PLXNA2	ASCC3	ABCA9	MBD5	LINC02456		NR3C1		ARHGAP21	ERBB4		MBNL2		FBXL20
SCAPER	SAMD12	LMCD1	ATF7IP	C2CD2	MMP16		HBB		PARVA	ANXA8L1		APPBP2		VAV3
PRKCA	TBC1D22A	HAND2-AS1	BAZ2B	ANKS1B	C7		AC093110.1		NCOA1	DPYD		PCCA		TMEM2
NKTR	ARHGAP6	EXOC4	MCTP1	TBCK	FAT3		APBB2		DSE	DTNA		PRKAG2		PLCL2
PDCD4	TANK	FOXN3	NR3C2	CCDC18-AS1	HP1BP3		ZDHHC20		RUFY3	PLEKHA5		TTC3		CTAGE5
PPP1R12A	FBXL17	NIPBL	NRP2	THRB	NHSL1		HLA-DRB1		TSHZ2	AF241726.2		QKI		ELL2
HNRNPA2B1	MYH10	USP25	CTSB	AKAP12	AKAP13		ZNF385D		CLASP2	AC004160.1		SPRY4-AS1		TNFAIP2
MAP4K4	BMPR1B	PIEZO2	ATXN1	GLCCI1	TFPI		BTG1		DCAF6	SLC41A2		LINC01376		FKBP5
GNB1	SCFD2	ATP2B4	ZFP36L1	COL1A2	RORA-AS1		SRGAP2		EBF2	VIPR2		LIX1-AS1		ENTPD1
SLC7A6OS	MEIS1	BICC1	SH3RF1	ZBTB16	AP001831.1		THSD7A		PARD3B	LAMB1		AGO3		IRAK3
SERINC5	MAN1C1	AKAP13	SEPT11	WDFY3	STK39		CHKA		AC011092.2	TMEM2		SCAF11		ATP1B3
PDE3B	TTC28	LRMDA	OXR1	PPP3CC	LRRC4C		NAMPT		AC012409.2	REV3L		NSD1		CCNY
RNF24	MIPOL1	MLLT10	CENPP	RAPH1	VGLL3		SORBS2		MKLN1	STAG1		FREM1		TENM4
UTRN	TPD52L1	SLIT3	CAT	COL6A1	JUN		ARHGEF26		AL138828.1	RSRC1		CALCRL		PDE4B
COMMD10	CDK6	AMMECR1	ZMYM2	VIM	ABCA8		MYH10		SRGAP1	NAV3		SHPRH		ITSN2
ZFP36L2	SH3GLB1	TRERF1	RSRC1	ARHGAP15	CCDC18-AS1		AL360091.3		UBR5	NTNG1		FAM107B		NCOA2
ANTXR2	ARHGAP5	ADAMTS9-AS2	ELF1	SEPT11	CDK13		RBMS3		C1orf21	CELF2		HIPK2		RAD51B
SGO1-AS1	LRRTM3	FAM160A1	TNFAIP8	RPL27A	MAPK10		FYN		NF1	PODN		LINC01725		TLE4
KLF6	EFNA5	MBD5	LINC-PINT	RPL32	PIK3R1		SCD		MEIS1	C9orf3		ADH1B		SGMS1
SMG6	NBEA	CRADD	COMMD10	RB1	ACYP2		GHR		DENND2A	DLG2		SPARC		FCGRT
TMEM2	SEMA3D	PTPRD	KCNQ1	AC018616.1			LGALS1		FREM1	UBR2		EEA1		ROCK1
ABCD2	ARAP2	DPYD	CPNE8	TNIK			LOXHD1		AC098829.1	NR2F1-AS1		HIBADH		R3HDM2
SPIDR	TCF7L2	MSC-AS1	LARGE1	CDC42BPA			ETV6		TSHR	FRMD6		INSR		CTTNBP2
ZNF609	SPTAN1	UBA6-AS1	DOCK8	COL6A3			EPB41L2		GLUL	OGN		SEMA3A		AKAP13
DDX5	SPATS2L	THRB	DOCK11	CPM			LRRFIP1		SUCLG2-AS1	TRA2A		BMPR1A		DIP2B
TTC3	DLG2	PRKD1	ABI2	NR3C2			EIF4G3		BCL2	RNLS		ZNF608		SUMF1
CAMK1D	CELF2	CDK13	RIN2	KIAA1109			MT2A		ZFAND5	PRKG1		SEPT11		NABP1
VPS8	CRLS1	SH3RF3	MGAT1	YAP1			MAP4		OGFRL1	IL16		FAM49B		SNTB1
FAM69A	OGN	ARHGEF12	KYNU	GNAI1			GSE1		PRKN	ADH1B		AC011287.1		FRMD4B
ACSL4	CTDSPL	NBEA	AFF1	ARID1B			MAST4		ACSS3	ATF7IP		RASGEF1B		PHACTR2
IGKC	SPATA6	DOCK5	SLC1A3	ESR1			FHL1		TACC1	ZNF280D		PTEN		FTH1
MBNL3	EMB	RABGAP1	SRRM2	HBB			SP100		KCNQ1OT1	CALD1		RTN1		RAPGEF1
EXOC4	PDE7B	MPDZ	RNF213	GFRA1			SAA1		AC008014.1	LIMA1		PARVA		AOAH
TRPM7	CRADD	KIF13A	ITGA9	C1QB			SOS1		CC2D2A	LINC01358		TNFAIP8		ARAP2
PVT1	MAST4	TNRC6B	FAM49B	JAK2			EPSTI1		CALD1	NCOR1		SESN1		DENND4C
MALAT1	BPTF	TEAD1	SLC25A13	TMEM117			INSR		ACYP2	ANKS1B		APBB1IP		EPB41L2
AKAP9	WT1	ADD3	NSMCE2	SLC8A1			AP002518.2		SCMH1	CASC15		TANK		ADAMTSL4-AS1
RAB2A	PCM1	ASH1L	CTDSPL	MFHAS1			RBMS3-AS3		NAV2	SSBP2		SUMF1		TBC1D5
CRADD	RBPMS	CALB2	GAS7	AL359915.2			ARGLU1		JAK2	DOCK3		UBR5		NHSL1
CDADC1	ITLN1	JMJD1C	EYA2	MGLL			STOX2		NRP1	CDON		SCD		ARFGEF1
DOCK11	FRY	STAT3	CTSS	DLG2			PRKD1		COL6A2	DPYS		EHBP1		PPM1B
ATP2B1	TNRC6A	CELF2	DENND4C	TIPARP			GNAQ		ARID5B	OSMR		STARD13-AS		CLIC4
AC097376.2	CYSTM1	SMYD3	STAG1	RBMS3			PTPRG		SMARCA2	FLRT2		SPON1		ANXA2
USP33	IL6ST	AC016205.1	FYB1	PEAK1			STARD13		THRB	IDH1		KAT6B		MS4A4A
AKT3	COBLL1	NR2F1-AS1	FAM110B	NFIB			DIAPH2-AS1		PLPP1	HAND2-AS1		SH3GLB1		AC084871.1
PHF3	ELP4	RICTOR	ARHGAP25	AP001528.2			STK38L		DENND5B	BMPR1B		SMARCA2		ALDH2
FRYL	PTPN13	GALNT18	EPS8	IGKC			CPM		FMN2	NELL2		PCNX1		ASCC3
ZBTB20	SENP6	LINC00607	TPM1	SH3RF3			PPP2R5A		CFD	ARID5B		DIP2C		MLLT10
RETREG1	TRA2A	DANT2	LARP4	PELI1					HELZ	AC012409.2		PBX1		EEA1
CNOT4	KIAA0368	SCMH1	CDC42SE2						ZNRF3	DLEU2		LMCD1-AS1		RTN3
N4BP2L2	RAP2C-AS1	VPS13D	AC092691.1						PTPRG	CLIC5		CARMN		KLF7
CLASP2	SHTN1	ANTXR1	SKAP2						MACF1	ATRNL1		PPA1		TCF12
TRA2A	ROR2	SEMA3A	RBM26						MGP	ANGPTL4		CACNA2D1		VPS13B
RFX3	RNF217	EEA1	SOS2						ADGRA3	THSD4		MLLT10		COLEC12
RSRP1	FRMPD4	EPB41L4A	ROCK1						PPARG	NLGN1		ARHGAP32		BABAM2
AHCYL2	TRPM7	ARID5B	NCOA2						CPQ	BCHE		VLDLR-AS1		WDFY3
CFLAR	COL8A1	PPP1R12B	ARID2						MYCBP2	CDK14		FOXP2		CEP128
ATP2B4	DLG1	TRPM7	ARHGAP6						PLSCR4	CALB2		KIAA0368		GCLC
PAPD4	ABCB1	FLRT2	HP1BP3						CYP1B1-AS1	PATJ		RFTN1		NIPBL
MCTP2	CAPN2	MYO1D	PDCD4						SVIL	AC098829.1		PICALM		MFHAS1
SLCO3A1	ST6GAL1	SAMD12	RBMS1						ESR1	LINC01197		MAP3K20		LRRFIP1
ANKH	FTO	SCFD2	USP15						ASPH	SLC40A1		BTG1		DOCK11
BTG1	CARMIL1	PRICKLE2	VAV3						FYN	DNM3		FMNL2		ATM
FOXO1	AHI1	DYNC2H1	SON						WSB1	AL359220.1		ZNF438		RIN2
HNRNPDL	ZHX3	SH3PXD2B	PTPRJ						IGF1R	PDGFD		DAB1		ANKRD17
MYO5A	ADH1B	RTN4	ST8SIA4						IGF2BP2	MPDZ		PCLO		ZNF148
FLI1	RICTOR	ZBTB7C	GNAQ						MBD5	ABI3BP		TRIO		IDH1
MARK3	DTNA	ABL1	MAP3K5						AKAP12	OGFRL1		FHIT		CLEC16A
SH3BGRL	ADAMTS9-AS2	CLEC16A	UBASH3B						HSD17B4	PIK3R1		PDGFC		WIPF1
CLEC16A	MAP2	LAMB1	CEP350						HSPG2	UBA6-AS1		ESR1		PKN2
CCDC18-AS1	EDA	ALDH1A2	HIBADH						DMXL2	APPL2		PHLPP1		PHIP
DAB1	PCOLCE2		CCDC88A						DENND1A	HP		FOXN2		KLF6
	NR2F1		PICALM						TMEM135	KCNQ1OT1		MAGI2		PAN3
	CERS6		ITFG1						CELF2	SLIT2		MACROD2		TBL1XR1
	AP002989.1		CD36						GULP1	DCAF6		AC068051.1		FAM19A2
	CFH		HNRNPH1						TRPC1	PTPRQ		AL359915.2		FNDC3B
	SHPRH		ESR1						EFEMP1	AC109779.1		PNISR		TIPARP
	FRMD4B		PPM1L						AASS	CACNA2D1		ESYT2		OSBPL3
	HIBCH		SMARCA2						NEXN	DPH6		AP002518.2		DOCK10
	TBC1D5		NBEA						MARK1	SH3BP5		RERE		RAPH1
	AC103876.1		KLF7						LMOD1	UPP2		IQCJ-SCHIP1		RUNX1
	LINC02360		LRRC4C						MAP4K4	TFPI2		SRSF5		DAPK1
	AKAP9		CPQ						MON2	ELP4		AP001831.1		CNTLN
	CDH6		SH3BP5						AP001528.2	PARD3B		STK39		FOXN3
	MYO9A		LPP						GPHN	PAWR		BCAR3		EXOC6B
	SRGAP2		ITM2B						SENP6	MAST4		EYA2		EPS8
	LGR4		CAB39						AC093110.1	AL359915.2		ARID5B		ATP11A
	CNTN4		BCAR3						LAMB1	SEMA3C		RBPMS		SNX9
	METTL15		ITSN2						DCLK1	BTG1		XYLT1		ZNF407
	GPATCH8		FNDC3A						CACNA1C	EVA1C		METTL15		APPL2
	BTBD9		CERS6						TRHDE-AS1	ID4		RNF130		IL18
	MAGI3		DLEU1						IPO9-AS1	RYR2		CCDC18-AS1		PELI1
	ZFPM2		TAOK3						ZRANB2	SLC28A3		PPP2R3A		RABGAP1L
	NF1		DEPTOR						ZFHX4	AC027288.3		LINC02456		PRRC2C
	PITPNC1		MLLT10						PDE7B	DSE		SH3D19		RASA1
	SNCAIP		MEF2C-AS1						SLIT2	ENOX1		UNC5C		SESTD1
	CALD1		C9orf84						MPP6	SCMH1		CLIP4		C20orf194
	PLCL1								VPS13D	PBX1		FBXL17		CMIP
	PTPRK								RNF19A	PDE4D		FGF1		SBF2
	PLXNA4								NHSL2	TPST1		AASS		MBP
	IMMP2L								ZNF292	SORBS2		SGO1-AS1		RPS6KA3
	TMTC2								YBX3	NEO1		RBM26		ZNF609
	IGF2BP2								LIMA1	LAMA4		AKAP12		MDFIC
	DDX17								ARHGAP32	CCDC80		COL4A3BP		SLTM
	GHR								APBB2	TTC28		AL356599.1		FTL
	ECHDC2								SETD5	FAM19A2		PPM1L		STK38L
	ZFP36L1								HIVEP3	GPCPD1		RBM6		LIMS1
	FBXL13								GSN	C1S		AC097376.2		WWC2
	SLC39A11								DPYD	CCNL1		CC2D2A		OGFRL1
	DAAM1								AC138123.2	FGF1		SDC2		ANKRD44
	ACSS3								MAGI2	ROR2		ME1		DAB2
	LRBA								NFAT5	AC134511.1		ERRFI1		PRKAG2
	ARHGEF3								PPP2R3A	PITPNC1		THSD7B		HDAC8
	LOXHD1								SIK2	ATM		MIR100HG		STK3
	EVI5								DYM	ARFGEF3		CRYBG3		CHKA
	L3MBTL4								CEP128	TXNRD1		ARHGAP10		SP100
	LINC00540								SASH1	NCAM2		IGF1		TMCC1
	YAP1								ARHGAP6			ANXA1		EXT1
	NAV2								CEP112			TBCK		AHNAK
	ZNF407								SH3RF1			SQSTM1		BIRC6
	FNDC3A								HIBCH					ASAP1
	KTN1								SYNE1					ZCCHC7
	CDH23								FMNL2					FNBP1
	BMPR1A								RBM26					RBM6
	NHSL1								ADAMTS3					EEF2K
	TANC1								EPS15					CDH23
	PDE4D								EDA					CPM
	DPYD								TFDP2					PIP4K2A
	MSLN								CCDC18-AS1					DYM
	AKAP6								SEMA3D					EML4
	CCBE1								ZEB2					ELMO1
	TENM3								PODN					APBA1
	RERE								NCOA2					RTN4
	TM4SF1								BNC2					ACER3
									CDK14					RPS6KA2
									FBLN1					BTBD9
									LINC01798					PYGL
									CTDSPL					DIAPH2
									PKD2					DOCK4
									LUC7L3					FNIP2
									GTDC1					ACTB
									TFPI					PVT1
									C1R					KCNQ1
									AGO3					BAZ2B
									SLC40A1					ARID2
									SDCCAG8					CAMKMT
									DOCK10					STON2
									PALM2-AKAP2					KIF13A
									ZNF638					TSC22D3
									SLC9A9					PDE4D
									WWP1					CENPP
									LAMA4					ANKS1A
									IRS2					USP25
									RNF24					MYCBP2
									GLIS3					ERBIN
									AC004160.1					WSB1
									ACACB					ARHGAP15
									LINC01697					MEF2C
									SMYD3					GTDC1
									AEBP2
									PTPN13
									ZNF438
									STK17B
									PHC3
									DGKI
									NPNT
									SOS2
									MAPK8
									MBP

## Sheet: S3
JOINTLY Factor	Match rank	Match label	Enriched in celltype	Manual curtion of matches
1	1	CD4+ Memory/Effector T CL0000624	NK/T	1
1	2	Dedifferentiation adipocyte:Adipose Tissue	NK/T	0
1	3	Microglia / Perivascular Macrophage CL0000881	NK/T	0
1	4	TYROBP+ CD74+ Layer 1-6 Microglia CL0000129	NK/T	0
1	5	Adipose-derived Stem cell:Abdominal Adipose Tissue	NK/T	0
2	1	Mesothelial CL0000077	Mesothelial	1
2	2	Adipose Progenitor cell:Adipose Tissue	Mesothelial	0
2	3	Mesenchymal Progenitor cell:Adipose Tissue	Mesothelial	0
2	4	Vascular Smooth Muscle CL0000359	Mesothelial	0
2	5	Alveolar Fibroblast CL0000057	Mesothelial	0
3	1	Mesenchymal Progenitor cell:Adipose Tissue	Mesothelial	0
3	2	Capillary Intermediate 2 CL0002144	Mesothelial	0
3	3	Capillary Intermediate CL0002144	Mesothelial	0
3	4	Mesothelial CL0000077	Mesothelial	1
3	5	Adipose-derived Stromal cell:Visceral Adipose Tissue	Mesothelial	0
4	1	IGSF21+ Dendritic CL0000451	DC/Monocyte/Macrophage	0
4	2	Mature Endothelial cell:Subcutaneous Adipose Tissue	DC/Monocyte/Macrophage	0
4	3	Immature Endothelial cell:Subcutaneous Adipose Tissue	DC/Monocyte/Macrophage	0
4	4	Microglia / Perivascular Macrophage CL0000881	DC/Monocyte/Macrophage	1
4	5	TYROBP+ CD74+ Layer 1-6 Microglia CL0000129	DC/Monocyte/Macrophage	0
5	1	Vascular Smooth Muscle CL0000359	Mural	1
5	2	Myofibroblast CL0000186	Mural	0
5	3	Preadipocyte Progenitor cell:Adipose Tissue	Mural	0
5	4	Activated Stellate CL0002410	Mural	0
5	5	Airway Smooth Muscle UBERON0004225	Mural	0
6	1	Adventitial Fibroblast CL0000057	FAP	0
6	2	Fibroblast CL0000057	FAP	0
6	3	Activated Stellate CL0002410	FAP	0
6	4	Myofibroblast CL0000186	FAP	0
6	5	Preadipocyte Progenitor cell:Adipose Tissue	FAP	1
7	1	Lymphatic UBERON0001473	LEC	1
7	2	Pericyte:Subcutaneous Adipose Tissue	LEC	0
7	3	Capillary Aerocyte CL0002144	LEC	0
7	4	Mesenchymal Progenitor cell:Adipose Tissue	LEC	0
7	5	Endothelial cell:White Adipose Tissue	LEC	0
8	1	Bronchial Vessel 1 CL0002328	Endothelial	0
8	2	Bronchial Vessel CL0002328	Endothelial	0
8	3	Stromal Vascular Fraction cell:Adipose Tissue	Endothelial	0
8	4	Endothelial cell:White Adipose Tissue	Endothelial	1
8	5	Endothelial Progenitor cell:Adipose Tissue	Endothelial	0
9	1	Fibroblast CL0000057	Mesothelial	0
9	2	Mesothelial CL0000077	Mesothelial	1
9	3	Activated Stellate CL0002410	Mesothelial	0
9	4	Dendritic Cell CL0000451	Mesothelial	0
9	5	Adventitial Fibroblast CL0000057	Mesothelial	0
10	1	Fibroblast CL0000057	Adipocyte/FAP	0
10	2	Alveolar Fibroblast CL0000057	Adipocyte/FAP	0
10	3	Pericyte CL0000669	Adipocyte/FAP	0
10	4	Preadipocyte Progenitor cell:Adipose Tissue	Adipocyte/FAP	1
10	5	Adventitial Fibroblast CL0000057	Adipocyte/FAP	0
11	1	Vascular Smooth Muscle CL0000359	Mesothelial	0
11	2	Fibroblast CL0000057	Mesothelial	0
11	3	Adipose Progenitor cell:Adipose Tissue	Mesothelial	0
11	4	Adventitial Fibroblast CL0000057	Mesothelial	0
11	5	Gamma Islet Cell CL0002275	Mesothelial	0
12	1	Bronchial Vessel 1 CL0002328	Endothelial	0
12	2	Bronchial Vessel CL0002328	Endothelial	0
12	3	Dendritic Cell CL0000451	Endothelial	0
12	4	Vein UBERON0001638	Endothelial	0
12	5	Endothelial cell:White Adipose Tissue	Endothelial	1
13	1	Mesenchymal Stem cell:White Adipose Tissue	Adipocyte	0
13	2	Mesenchymal Progenitor cell:Adipose Tissue	Adipocyte	0
13	3	Fat Cell (adipocyte):Adipose Tissue	Adipocyte	1
13	4	Adipose Progenitor cell:Adipose Tissue	Adipocyte	0
13	5	Adipose-derived Stromal cell:Visceral Adipose Tissue	Adipocyte	0
14	1	Adipose Progenitor cell:Adipose Tissue	Endothelial	0
14	2	Artery UBERON0001637	Endothelial	1
14	3	Capillary UBERON0001982	Endothelial	0
14	4	Mesenchymal Progenitor cell:Adipose Tissue	Endothelial	0
14	5	Capillary Intermediate 2 CL0002144	Endothelial	0
15	1	Macrophage CL0000235	DC/Monocyte/Macrophage	1
15	2	TYROBP+ CD74+ Layer 1-6 Microglia CL0000129	DC/Monocyte/Macrophage	0
15	3	Dendritic Cell CL0000451	DC/Monocyte/Macrophage	0
15	4	Microglia / Perivascular Macrophage CL0000881	DC/Monocyte/Macrophage	0
15	5	Immune CL0000738	DC/Monocyte/Macrophage	0

## Sheet: S4
Population	Feature	Average expression	logFC	P-value	P-adj	AUC	Percent in	Percent out
ACKR1+ VEC	VWF	2.52229	2.37588	0	0	0.911898	86.2985	7.18343
ACKR1+ VEC	LDB2	3.2355	2.63654	0	0	0.903945	91.2328	27.1554
ACKR1+ VEC	MECOM	2.4489	2.26463	0	0	0.885047	82.7071	7.73648
ACKR1+ VEC	PTPRB	2.08336	1.94781	0	0	0.880108	80.8511	6.22131
ACKR1+ VEC	PTPRM	2.8223	2.09897	0	0	0.8763	89.5126	33.7344
ACKR1+ VEC	PLCB4	2.14082	1.9568	0	0	0.867454	79.2214	8.97304
ACKR1+ VEC	EMCN	2.02211	1.87485	0	0	0.864589	77.9538	7.3975
ACKR1+ VEC	ANO2	2.11005	2.0148	0	0	0.863658	75.8111	4.30228
ACKR1+ VEC	MCTP1	2.30084	1.97448	0	0	0.861858	82.2091	16.1627
ACKR1+ VEC	CCSER1	2.30312	2.04158	0	0	0.857935	78.2858	13.5043
ACKR1+ VEC	TLL1	2.00851	1.92653	0	0	0.853623	73.2458	4.51081
ACKR1+ VEC	RALGAPA2	2.29597	1.77531	0	0	0.851508	83.1296	29.5314
ACKR1+ VEC	PECAM1	1.99493	1.78439	0	0	0.844376	75.3131	11.6134
ACKR1+ VEC	ERG	1.71608	1.5689	0	0	0.84132	73.9701	7.80969
ACKR1+ VEC	ZNF385D	2.15173	1.85572	0	0	0.840027	77.486	14.3748
ACKR1+ VEC	FLI1	2.03126	1.70778	0	0	0.837731	77.6973	17.282
ACKR1+ VEC	PKP4	1.9672	1.65129	0	0	0.834697	76.5505	18.9595
ACKR1+ VEC	PREX2	1.85137	1.59142	0	0	0.834082	75.5093	15.1177
ACKR1+ VEC	MAGI1	2.36037	1.77458	0	0	0.830329	81.7565	27.8226
ACKR1+ VEC	SPARCL1	2.36891	1.79254	0	0	0.825015	81.4999	27.289
ACKR1+ VEC	ELMO1	2.20177	1.62047	0	0	0.819876	81.7414	28.4766
ACKR1+ VEC	ABLIM1	2.21244	1.49815	0	0	0.814992	82.8127	39.1605
ACKR1+ VEC	CYYR1	1.52229	1.44471	0	0	0.813873	66.0631	3.82383
ACKR1+ VEC	LIFR	1.89765	1.52986	0	0	0.812962	74.7095	22.0881
ACKR1+ VEC	LYST	1.96324	1.44347	0	0	0.806751	76.8674	32.0326
ACKR1+ VEC	RASAL2	1.95417	1.46258	0	0	0.802965	76.9277	26.5708
ACKR1+ VEC	TSHZ2	2.66318	1.62115	0	0	0.798623	86.9172	44.6657
ACKR1+ VEC	ADGRL4	1.47445	1.3801	0	0	0.796772	63.3771	4.49415
ACKR1+ VEC	EGFL7	1.35572	1.23684	0	0	0.793648	64.3579	6.36391
ACKR1+ VEC	NOSTRIN	1.29959	1.23829	0	0	0.792766	61.4305	3.56847
ACKR1+ VEC	MYRIP	1.59251	1.4506	0	0	0.79276	63.9203	8.88213
ACKR1+ VEC	ARHGAP31	1.49751	1.24808	0	0	0.788207	68.0549	15.5208
ACKR1+ VEC	TMTC1	1.83801	1.48471	0	0	0.781961	68.7641	19.6323
ACKR1+ VEC	JAM2	1.31119	1.20449	0	0	0.78151	61.1589	6.82051
ACKR1+ VEC	DOCK9	1.61847	1.23054	0	0	0.781436	71.5558	22.2647
ACKR1+ VEC	ITGA6	1.3373	1.19532	0	0	0.780186	62.4566	8.79609
ACKR1+ VEC	PRKCH	1.62788	1.24341	0	0	0.777169	70.3637	21.908
ACKR1+ VEC	SYNE2	1.90917	1.25135	0	0	0.777145	77.5917	36.381
ACKR1+ VEC	DNM3	1.45324	1.21161	0	0	0.768981	63.5733	14.8554
ACKR1+ VEC	SHANK3	1.15094	1.06008	0	0	0.768853	58.3975	4.85117
ACKR1+ VEC	CADPS2	1.55508	1.20223	0	0	0.765616	66.9836	19.3995
ACKR1+ VEC	SEMA6A	1.27138	1.11081	0	0	0.763689	60.2535	10.4174
ACKR1+ VEC	CMIP	1.52438	1.12154	0	0	0.763628	69.0509	25.9754
ACKR1+ VEC	FLT1	1.22673	1.12855	0	0	0.76317	57.2808	5.15407
ACKR1+ VEC	KALRN	1.57376	1.21471	0	0	0.7627	66.8779	19.2312
ACKR1+ VEC	EPB41L4A	1.47331	1.1539	0	0	0.76223	65.3539	19.2704
ACKR1+ VEC	BMPR2	1.70621	1.15334	0	0	0.757346	71.4652	33.3136
ACKR1+ VEC	DOCK4	2.05643	1.25581	0	0	0.757213	79.8853	36.1107
ACKR1+ VEC	ZNF521	1.67924	1.21684	0	0	0.755088	67.4061	26.5909
ACKR1+ VEC	GNAQ	1.91154	1.14671	0	0	0.752796	76.2185	41.8352
ACKR1+ VEC	TCF4	2.16785	1.16343	0	0	0.752278	81.1227	49.2872
ACKR1+ VEC	STOX2	1.26627	1.13827	0	0	0.750725	55.8322	7.11473
ACKR1+ VEC	ACKR1	1.16221	1.14549	0	0	0.749195	50.6866	1.22893
ACKR1+ VEC	MEF2C	1.6634	1.16659	0	0	0.74848	69.9411	25.0192
ACKR1+ VEC	RAPGEF5	1.2141	1.08433	0	0	0.748273	55.636	6.82016
ACKR1+ VEC	ASAP1	1.72935	1.06969	0	0	0.746965	74.453	36.6843
ACKR1+ VEC	EPAS1	1.35611	1.08361	0	0	0.746059	61.5361	16.9125
ACKR1+ VEC	CPXM2	1.07351	0.98083	0	0	0.745293	53.8705	6.57694
ACKR1+ VEC	THSD7A	1.49918	1.14419	0	0	0.744425	63.4676	18.8513
ACKR1+ VEC	HSPG2	1.63784	1.03973	0	0	0.743674	71.5105	34.5633
ACKR1+ VEC	SNTG2	1.3713	1.24204	0	0	0.742355	53.8404	7.60533
ACKR1+ VEC	PALMD	1.44887	1.05192	0	0	0.740286	65.716	19.9779
ACKR1+ VEC	SASH1	1.67424	1.04227	0	0	0.739334	72.7328	35.711
ACKR1+ VEC	AKT3	1.85703	1.07231	0	0	0.737298	75.5696	40.2454
ACKR1+ VEC	TACR1	1.17347	1.07359	0	0	0.736179	51.8485	5.85735
ACKR1+ VEC	EXOC6	1.36882	1.07237	0	0	0.734649	59.5443	18.1865
ACKR1+ VEC	TMTC2	1.34243	1.07891	0	0	0.734534	58.1108	15.0656
ACKR1+ VEC	TACC1	1.9936	1.04386	0	0	0.733931	77.818	50.7083
ACKR1+ VEC	PITPNC1	1.8276	1.16904	0	0	0.732888	71.0125	33.4409
ACKR1+ VEC	IL1R1	1.20151	0.969261	0	0	0.732121	57.5977	16.8327
ACKR1+ VEC	PLEKHG1	1.28693	1.06839	0	0	0.730822	56.1944	12.699
ACKR1+ VEC	PLEKHA7	1.11512	0.939089	0	0	0.729416	54.5948	11.3108
ACKR1+ VEC	MEOX2	1.30637	1.07011	0	0	0.728968	55.9378	12.521
ACKR1+ VEC	FOXP1	2.28784	0.976542	0	0	0.728488	83.7483	62.5826
ACKR1+ VEC	RYR3	1.18044	1.1314	0	0	0.728435	47.9402	3.18716
ACKR1+ VEC	LRRC1	0.999438	0.897215	0	0	0.728237	51.0487	6.72093
ACKR1+ VEC	IGFBP7	1.77268	1.09884	0	0	0.727385	70.8767	32.6075
ACKR1+ VEC	APP	1.53502	0.948092	0	0	0.725925	68.6585	34.4596
ACKR1+ VEC	PLVAP	0.941055	0.906557	0	0	0.724707	46.7632	2.10708
ACKR1+ VEC	FLNB	1.16085	0.886541	0	0	0.724288	58.5333	17.0173
ACKR1+ VEC	AQP1	1.07627	0.979525	0	0	0.724092	49.6303	6.28758
ACKR1+ VEC	ST6GALNAC3	1.33827	1.04104	0	0	0.7232	57.1148	14.2531
ACKR1+ VEC	MYO5C	0.94174	0.838807	0	0	0.721688	49.8868	6.49402
ACKR1+ VEC	PTK2	1.67459	0.936986	0	0	0.720784	72.3102	39.6688
ACKR1+ VEC	TPO	1.09073	1.06527	0	0	0.720494	45.2543	1.37534
ACKR1+ VEC	STARD9	1.15806	0.888768	0	0	0.71858	56.8432	17.1238
ACKR1+ VEC	FGD5	0.95567	0.816207	0	0	0.717384	51.1544	9.0289
ACKR1+ VEC	ENG	1.06412	0.866718	0	0	0.716552	53.6442	14.0036
ACKR1+ VEC	TGFBR2	1.69136	0.901823	0	0	0.715308	72.1443	45.6209
ACKR1+ VEC	NKTR	1.71744	0.851156	0	0	0.715289	74.9962	50.3499
ACKR1+ VEC	ZBTB20	2.85837	0.941963	0	0	0.715098	90.8556	72.7572
ACKR1+ VEC	ICA1	0.909686	0.791751	0	0	0.714851	49.6303	7.90545
ACKR1+ VEC	CEP112	1.43632	0.92341	0	0	0.713426	63.9203	28.4131
ACKR1+ VEC	APBB2	1.79811	0.985546	0	0	0.713324	72.8082	38.9905
ACKR1+ VEC	PGM5	0.984616	0.84889	0	0	0.71169	49.404	8.38841
ACKR1+ VEC	TANC1	1.13258	0.841042	0	0	0.711246	56.7074	17.8954
ACKR1+ VEC	FGD4	1.39182	0.907345	0	0	0.706727	62.5019	28.1255
ACKR1+ VEC	EVA1C	1.20999	0.881964	0	0	0.706379	57.0696	19.3738
ACKR1+ VEC	TEK	0.840541	0.754404	0	0	0.705925	46.0088	5.27099
ACKR1+ VEC	RAMP3	0.771177	0.750432	0	0	0.704709	42.1307	1.32295
ACKR1+ VEC	RAB3C	0.897824	0.887021	0	0	0.704708	41.512	0.712653
ACKR1+ VEC	GMDS	1.17218	0.850876	0	0	0.704562	56.1642	19.2163
ACKR1+ VEC	CALCRL	1.15715	0.907802	0	0	0.704426	52.6483	14.9914
ACKR1+ VEC	ARHGEF3	1.23967	0.848616	0	0	0.701413	58.5785	23.1491
ACKR1+ VEC	FRYL	1.34653	0.801302	0	0	0.700326	64.4636	33.3417
ACKR1+ VEC	LAMA3	0.942496	0.807236	0	0	0.700102	47.1405	8.41478
ACKR1+ VEC	HIP1	1.31507	0.841961	0	0	0.699406	61.6116	27.1023
ACKR1+ VEC	MYOF	1.22044	0.786374	0	0	0.699081	61.0684	27.0714
ACKR1+ VEC	CPNE8	1.08045	0.786615	0	0	0.698391	54.7156	18.1917
ACKR1+ VEC	ARL15	1.59995	0.921988	0	0	0.698011	65.9876	31.3574
ACKR1+ VEC	TSPAN9	0.915009	0.744426	0	0	0.697612	49.1172	11.8164
ACKR1+ VEC	RHOJ	0.840811	0.724706	0	0	0.696927	45.9333	7.27641
ACKR1+ VEC	ELK3	1.00292	0.749575	0	0	0.696789	53.0859	17.5672
ACKR1+ VEC	HIPK3	1.40084	0.804841	0	0	0.693408	64.8861	37.3175
ACKR1+ VEC	PDIA5	0.780751	0.712134	0	0	0.693337	42.9003	5.34559
ACKR1+ VEC	FBXL7	1.86804	0.982881	0	0	0.692651	70.424	38.3517
ACKR1+ VEC	DOCK1	1.32526	0.783567	0	0	0.692626	63.1658	31.9063
ACKR1+ VEC	NUAK1	0.928579	0.782537	0	0	0.691864	46.386	10.2908
ACKR1+ VEC	LRRFIP1	1.5747	0.7931	0	0	0.691793	70.8013	43.213
ACKR1+ VEC	NPDC1	0.839643	0.699171	0	0	0.690677	46.4614	10.7443
ACKR1+ VEC	CHN1	0.845875	0.745722	0	0	0.68952	43.3982	6.60123
ACKR1+ VEC	TFPI	1.26328	0.803151	0	0	0.688792	58.8502	25.7214
ACKR1+ VEC	PLSCR1	0.968441	0.713296	0	0	0.688762	51.8183	17.8954
ACKR1+ VEC	PPP1R13B	0.86564	0.701536	0	0	0.687856	46.8387	10.9122
ACKR1+ VEC	ETV6	1.20014	0.76913	0	0	0.687165	58.2918	26.0031
ACKR1+ VEC	ST6GAL1	1.16739	0.805973	0	0	0.687021	54.2629	19.0834
ACKR1+ VEC	PLCXD3	0.857135	0.823606	0	0	0.68611	38.8864	1.90411
ACKR1+ VEC	ENTPD1	0.843532	0.723039	0	0	0.685382	43.6849	7.40687
ACKR1+ VEC	CRIM1	1.5061	0.823807	0	0	0.685116	66.5761	34.7538
ACKR1+ VEC	NXN	0.911662	0.721353	0	0	0.684089	47.0198	11.4829
ACKR1+ VEC	ELOVL7	0.766733	0.739216	0	0	0.683655	38.2828	1.85657
ACKR1+ VEC	SHROOM4	0.709522	0.6526	0	0	0.683076	39.9427	3.56951
ACKR1+ VEC	TGFBR3	1.51059	0.780548	0	0	0.682546	67.1043	39.1702
ACKR1+ VEC	PIK3C2A	1.17077	0.71027	0	0	0.682133	59.1821	29.8672
ACKR1+ VEC	FCHSD2	1.35657	0.78703	0	0	0.682058	61.6719	30.21
ACKR1+ VEC	A2M	1.18489	0.814688	0	0	0.681983	53.448	19.6767
ACKR1+ VEC	RAPGEF4	0.835422	0.714201	0	0	0.681588	43.021	8.06297
ACKR1+ VEC	LRMDA	1.97571	0.972912	0	0	0.680591	70.0619	39.2653
ACKR1+ VEC	SH3RF3	1.05753	0.798991	0	0	0.679971	48.6344	15.6738
ACKR1+ VEC	GRB10	0.926507	0.698171	0	0	0.679449	48.4835	15.3789
ACKR1+ VEC	ANKRD29	0.714671	0.62605	0	0	0.679233	41.1348	5.72828
ACKR1+ VEC	MYH9	1.16276	0.707929	0	0	0.679217	58.3371	29.8259
ACKR1+ VEC	ZNF423	0.836362	0.685773	0	0	0.679172	44.4847	10.6828
ACKR1+ VEC	ITPR1	0.933753	0.699628	0	0	0.678966	48.4835	15.3345
ACKR1+ VEC	ADAMTS9	1.2692	0.950075	0	0	0.678852	49.7812	17.5044
ACKR1+ VEC	GALNT18	0.925239	0.738369	0	0	0.678814	45.1486	10.2988
ACKR1+ VEC	LDLRAD4	1.39324	0.782735	0	0	0.67838	62.2906	31.6051
ACKR1+ VEC	RPS6KA2	0.918075	0.68702	0	0	0.67678	47.9252	14.3009
ACKR1+ VEC	CDH5	0.653245	0.583165	0	0	0.676366	39.3994	3.93763
ACKR1+ VEC	LMCD1	0.892034	0.701974	0	0	0.676122	45.6617	12.6272
ACKR1+ VEC	MYO1E	0.985626	0.714704	0	0	0.67606	49.238	16.1638
ACKR1+ VEC	PDE7B	1.14681	0.826675	0	0	0.675802	49.3889	17.0821
ACKR1+ VEC	HEG1	1.17581	0.723125	0	0	0.675475	57.2054	24.6302
ACKR1+ VEC	ARHGAP29	1.16612	0.696779	0	0	0.67508	58.2013	27.6349
ACKR1+ VEC	BACE2	0.841102	0.671001	0	0	0.674699	44.7261	11.8125
ACKR1+ VEC	PLSCR4	1.27261	0.720361	0	0	0.674096	60.4648	32.7293
ACKR1+ VEC	PTPRK	1.04895	0.701983	0	0	0.673057	52.105	20.5909
ACKR1+ VEC	GFOD1	0.831146	0.65192	0	0	0.672808	44.7865	11.8632
ACKR1+ VEC	PDLIM5	1.36362	0.714452	0	0	0.672667	63.9052	36.9632
ACKR1+ VEC	PLCB1	1.72633	0.848953	0	0	0.672494	70.2429	35.2173
ACKR1+ VEC	NRP1	1.46724	0.775214	0	0	0.672486	64.6748	34.0196
ACKR1+ VEC	PPP1R16B	0.765759	0.633268	0	0	0.671995	41.7233	7.83467
ACKR1+ VEC	SMAD1	0.76738	0.65535	0	0	0.671691	40.9084	7.7514
ACKR1+ VEC	MACF1	1.74332	0.675894	0	0	0.669405	75.63	55.0661
ACKR1+ VEC	OSBPL10	0.86135	0.668392	0	0	0.668758	44.1527	11.9749
ACKR1+ VEC	UTRN	2.05522	0.732766	0	0	0.668737	79.9306	60.1605
ACKR1+ VEC	MLPH	0.571902	0.558649	0	0	0.667844	34.4047	0.881968
ACKR1+ VEC	ATP8B1	0.979956	0.663993	0	0	0.667476	50.0226	18.5699
ACKR1+ VEC	NR5A2	0.679647	0.640594	0	0	0.666988	35.4761	2.1331
ACKR1+ VEC	PTPRE	0.98846	0.666123	0	0	0.666825	49.751	18.7621
ACKR1+ VEC	SPTLC2	0.895981	0.618333	0	0	0.665245	48.8004	18.3985
ACKR1+ VEC	BAZ2B	1.53904	0.682592	0	0	0.664747	69.1867	45.5848
ACKR1+ VEC	ATP8A1	0.849086	0.63934	0	0	0.664338	44.1829	13.0873
ACKR1+ VEC	MCF2L	0.651143	0.595797	0	0	0.664302	36.0646	3.36376
ACKR1+ VEC	KIAA1217	1.12978	0.717627	0	0	0.66417	51.8636	22.13
ACKR1+ VEC	ITGB4	0.577712	0.541278	0	0	0.663741	35.1139	2.55535
ACKR1+ VEC	KIAA1671	0.770407	0.596664	0	0	0.662825	42.5532	10.9611
ACKR1+ VEC	FTX	2.51712	0.859522	0	0	0.662562	85.4534	61.0078
ACKR1+ VEC	HDAC9	1.24397	0.832698	0	0	0.662382	49.5699	20.0091
ACKR1+ VEC	FAR2	0.815951	0.638438	0	0	0.662357	42.2816	11.3952
ACKR1+ VEC	ADCY4	0.555574	0.523379	0	0	0.662139	34.4651	2.08071
ACKR1+ VEC	ACACB	1.43636	0.663743	0	0	0.660871	66.0178	33.4201
ACKR1+ VEC	RAPGEF3	0.60627	0.541043	0	0	0.660634	36.2155	4.33559
ACKR1+ VEC	WWTR1	0.987615	0.665576	0	0	0.66021	49.0116	20.8977
ACKR1+ VEC	LIMS2	0.655947	0.547515	0	0	0.660099	38.9166	7.76666
ACKR1+ VEC	MMP16	0.778291	0.687987	0	0	0.659864	36.7285	5.4986
ACKR1+ VEC	PPP3CA	1.54269	0.674143	0	0	0.659784	67.9644	47.6686
ACKR1+ VEC	CD36	1.86615	0.873144	0	0	0.659136	67.9644	37.5402
ACKR1+ VEC	TJP1	1.07427	0.616568	0	0	0.658595	55.5455	26.8098
ACKR1+ VEC	HDGFL3	0.725514	0.578378	0	0	0.658297	40.6217	10.4393
ACKR1+ VEC	GSE1	1.08669	0.672082	0	0	0.658149	52.0296	24.0005
ACKR1+ VEC	CSGALNACT1	1.05191	0.680185	0	0	0.657672	49.1776	19.0404
ACKR1+ VEC	GULP1	0.940466	0.629914	0	0	0.656288	47.5177	19.3464
ACKR1+ VEC	ENTPD1-AS1	1.06827	0.711024	0	0	0.656128	48.2722	20.703
ACKR1+ VEC	MET	0.761097	0.581379	0	0	0.656067	41.1498	10.3519
ACKR1+ VEC	ZEB1	1.45225	0.661286	0	0	0.655807	66.1687	40.3596
ACKR1+ VEC	TBCD	0.764991	0.563651	0	0	0.655247	43.2775	14.5809
ACKR1+ VEC	FRY	0.840383	0.576732	0	0	0.655198	45.7522	16.3279
ACKR1+ VEC	KLF7	0.985503	0.628035	0	0	0.655165	50.2037	23.5665
ACKR1+ VEC	RFX3	1.01029	0.615677	0	0	0.654704	51.1695	23.6463
ACKR1+ VEC	NR2F2-AS1	1.01773	0.678871	0	0	0.654648	46.7029	17.3302
ACKR1+ VEC	WNK1	1.30756	0.634081	0	0	0.654573	61.7776	41.269
ACKR1+ VEC	MMP28	0.69531	0.568547	0	0	0.654507	38.826	9.54205
ACKR1+ VEC	CLEC1A	0.549604	0.521363	0	0	0.654506	32.6392	1.80418
ACKR1+ VEC	SPNS2	0.530211	0.511549	0	0	0.654033	32.0054	1.26779
ACKR1+ VEC	LHX6	0.503213	0.499393	0	0	0.653262	30.9039	0.265076
ACKR1+ VEC	EPHA4	0.730788	0.56971	0	0	0.653053	39.7918	9.99587
ACKR1+ VEC	IL6ST	1.35468	0.607487	0	0	0.653024	63.362	44.5241
ACKR1+ VEC	NFAT5	1.43025	0.61982	0	0	0.651966	65.5198	44.7566
ACKR1+ VEC	PDE4D	1.61585	0.738478	0	0	0.650642	65.2482	37.0631
ACKR1+ VEC	SH3BGRL2	0.607126	0.540076	0	0	0.650405	34.4802	5.0937
ACKR1+ VEC	SELP	0.488335	0.483657	0	0	0.650369	30.3908	0.341407
ACKR1+ VEC	ARHGAP26	1.29804	0.668533	0	0	0.650243	58.2918	34.1039
ACKR1+ VEC	ACTN1	0.728286	0.537968	0	0	0.649781	41.7233	14.0442
ACKR1+ VEC	TPD52L1	0.707681	0.537451	0	0	0.649497	39.5654	9.98026
ACKR1+ VEC	CDC42BPA	1.21387	0.592339	0	0	0.649171	59.6952	34.785
ACKR1+ VEC	CNTNAP3B	0.643985	0.559706	0	0	0.649125	34.8272	5.52566
ACKR1+ VEC	MBNL1	2.15611	0.594605	0	0	0.648803	81.6508	70.6456
ACKR1+ VEC	AFDN	0.894407	0.563708	0	0	0.648399	47.9101	20.7391
ACKR1+ VEC	KLHL3	0.568919	0.511429	0	0	0.647958	33.4239	4.397
ACKR1+ VEC	RBMS2	0.801445	0.5422	0	0	0.647653	44.9374	18.1595
ACKR1+ VEC	SPC25	0.59749	0.57039	0	0	0.647572	30.9944	1.55021
ACKR1+ VEC	CDK17	0.93316	0.561565	0	0	0.647441	49.7963	24.2503
ACKR1+ VEC	EBF3	0.789856	0.551764	0	0	0.647402	43.368	16.0826
ACKR1+ VEC	LRCH1	0.815694	0.553918	0	0	0.647209	44.198	16.3924
ACKR1+ VEC	EBF1	2.1033	0.782758	0	0	0.647079	78.1651	49.4024
ACKR1+ VEC	PCAT19	0.531699	0.500538	0	0	0.646978	31.266	1.88676
ACKR1+ VEC	SNRK	0.939309	0.579491	0	0	0.646933	49.0116	24.6559
ACKR1+ VEC	IRAK3	1.03869	0.591057	0	0	0.646924	52.8444	28.1279
ACKR1+ VEC	DGKH	0.865958	0.566952	0	0	0.64685	45.5108	17.6689
ACKR1+ VEC	ECE1	0.782808	0.525085	0	0	0.64667	44.9072	17.9766
ACKR1+ VEC	CYYR1-AS1	0.647211	0.617171	0	0	0.646509	30.7228	1.41386
ACKR1+ VEC	DACH1	0.709032	0.609924	0	0	0.646389	34.1482	5.00592
ACKR1+ VEC	FNBP1L	0.711129	0.530712	0	0	0.646375	40.2143	12.4058
ACKR1+ VEC	PHKB	1.0403	0.555325	0	0	0.646193	54.6401	30.8252
ACKR1+ VEC	GNB4	0.682425	0.513646	0	0	0.645911	39.8974	12.4232
ACKR1+ VEC	CADM3-AS1	0.497627	0.492084	0	0	0.645763	29.5307	0.422595
ACKR1+ VEC	DOC2B	0.470453	0.454584	0	0	0.644496	30.0136	1.19909
ACKR1+ VEC	SULF2	0.710908	0.507008	0	0	0.64394	41.2555	13.7371
ACKR1+ VEC	MEF2A	1.37665	0.592854	0	0	0.643502	63.7242	42.8546
ACKR1+ VEC	ARHGEF12	0.985817	0.547982	0	0	0.642586	51.9541	27.902
ACKR1+ VEC	CD34	0.96255	0.55749	0	0	0.642377	49.8416	23.8437
ACKR1+ VEC	SCARB1	0.71949	0.550989	0	0	0.642221	38.4186	11.5159
ACKR1+ VEC	SPTBN1	1.81661	0.620421	0	0	0.642131	77.0032	55.3975
ACKR1+ VEC	PLAT	0.650785	0.544617	0	0	0.641652	34.7669	7.44365
ACKR1+ VEC	HIF3A	0.618675	0.512661	0	0	0.64158	34.7367	6.97109
ACKR1+ VEC	VEGFC	0.808715	0.637017	0	0	0.641301	37.3925	10.763
ACKR1+ VEC	ANKS1A	0.945835	0.555529	0	0	0.64118	49.072	24.0907
ACKR1+ VEC	LINC01695	0.659174	0.596473	0	0	0.641091	31.4018	3.46542
ACKR1+ VEC	XAF1	0.746326	0.515867	0	0	0.641022	41.7082	14.8613
ACKR1+ VEC	LINC-PINT	1.5514	0.638533	0	0	0.640804	66.1083	43.0072
ACKR1+ VEC	IL33	0.631094	0.503275	0	0	0.6406	36.2004	9.33526
ACKR1+ VEC	PRKAG2	1.07471	0.56495	0	0	0.640577	53.8404	30.9549
ACKR1+ VEC	COMMD10	1.10408	0.577102	0	0	0.640451	53.8102	30.7509
ACKR1+ VEC	PDE2A	0.516489	0.458668	0	0	0.640328	31.8093	3.91716
ACKR1+ VEC	MTUS1	0.849265	0.545637	0	0	0.640155	45.043	19.9196
ACKR1+ VEC	MEOX1	0.528426	0.504839	0	0	0.640139	29.3798	1.38471
ACKR1+ VEC	NFIB	1.86663	0.632469	0	0	0.640016	76.5656	54.409
ACKR1+ VEC	NEDD4	0.661038	0.494563	0	0	0.639786	38.1621	11.2807
ACKR1+ VEC	PELI2	0.856997	0.580097	0	0	0.639541	42.7644	17.4482
ACKR1+ VEC	LMBR1	0.791731	0.525462	0	0	0.638989	43.1719	18.0828
ACKR1+ VEC	SEMA6A-AS1	0.659395	0.569606	0	0	0.638786	32.7901	5.69324
ACKR1+ VEC	IGF1R	1.06163	0.577773	0	0	0.638617	51.6976	27.1675
ACKR1+ VEC	ROBO4	0.534112	0.450611	0	0	0.63854	33.0919	5.62246
ACKR1+ VEC	FOXO1	1.39052	0.5762	0	0	0.638066	64.1467	43.4128
ACKR1+ VEC	SWAP70	0.785394	0.504265	0	0	0.637553	44.3338	19.7669
ACKR1+ VEC	ADAM15	0.593441	0.477088	0	0	0.637177	35.3403	9.21868
ACKR1+ VEC	ABLIM3	0.693786	0.49624	0	0	0.635685	38.0112	11.4229
ACKR1+ VEC	GIMAP8	0.503759	0.438146	0	0	0.635514	31.2359	4.18918
ACKR1+ VEC	COL15A1	0.861334	0.567487	0	0	0.634899	42.1458	16.9666
ACKR1+ VEC	TIE1	0.474089	0.421258	0	0	0.634839	30.2701	3.23331
ACKR1+ VEC	NR3C2	1.095	0.566911	0	0	0.63468	52.105	29.0154
ACKR1+ VEC	AFF1	1.33227	0.547427	0	0	0.634319	63.3771	43.5617
ACKR1+ VEC	FRMPD4	0.614864	0.570579	0	0	0.634281	29.2289	2.64382
ACKR1+ VEC	TCF12	1.51113	0.563252	0	0	0.634205	67.8889	46.9681
ACKR1+ VEC	PLCG2	0.638278	0.470032	0	0	0.633918	37.0002	11.095
ACKR1+ VEC	MGAT4A	0.689504	0.467087	0	0	0.633887	40.1237	14.3065
ACKR1+ VEC	FAM171A1	0.557554	0.468702	0	0	0.633547	32.6543	6.76604
ACKR1+ VEC	ETS2	0.670091	0.492008	0	0	0.63322	37.0756	11.4958
ACKR1+ VEC	MCU	0.831687	0.546655	0	0	0.632808	41.8138	17.7372
ACKR1+ VEC	PDE9A	0.503111	0.446658	0	0	0.63277	30.1041	3.70274
ACKR1+ VEC	KANK3	0.467051	0.415212	0	0	0.632683	29.923	3.44703
ACKR1+ VEC	SLCO2A1	0.494828	0.473904	0	0	0.631857	27.5992	1.27611
ACKR1+ VEC	TMOD3	0.93893	0.495346	0	0	0.631711	51.1996	29.9859
ACKR1+ VEC	RAI14	0.593739	0.474312	0	0	0.631642	33.5446	7.76701
ACKR1+ VEC	CCDC178	0.577053	0.528825	0	0	0.631404	28.8064	2.62994
ACKR1+ VEC	RERE	1.51077	0.542901	0	0	0.631266	68.6887	49.1258
ACKR1+ VEC	CMTM8	0.610283	0.483871	0	0	0.631214	33.9671	8.57681
ACKR1+ VEC	CD93	0.5181	0.448927	0	0	0.630701	30.5115	4.6489
ACKR1+ VEC	RIN2	0.91452	0.533103	0	0	0.630533	46.718	24.4925
ACKR1+ VEC	CLDN5	0.610868	0.502955	0	0	0.629969	31.4018	5.36883
ACKR1+ VEC	NCOA7	1.15539	0.525644	0	0	0.629926	56.7829	39.2892
ACKR1+ VEC	UACA	1.07128	0.506926	0	0	0.629761	55.123	32.8459
ACKR1+ VEC	SORBS2	0.936534	0.514313	0	0	0.629097	46.5067	19.6372
ACKR1+ VEC	CD74	1.27579	0.562961	0	0	0.6288	56.4207	32.1721
ACKR1+ VEC	MMRN2	0.46349	0.402567	0	0	0.627964	29.6665	4.23324
ACKR1+ VEC	TTC28	1.51304	0.572356	0	0	0.627933	66.4252	43.5089
ACKR1+ VEC	IL15	0.558421	0.444285	0	0	0.627742	32.7147	7.7573
ACKR1+ VEC	ITPR2	1.33602	0.573186	0	0	0.627656	58.6087	37.7463
ACKR1+ VEC	ELF2	1.26069	0.508154	0	0	0.627221	60.8722	44.1192
ACKR1+ VEC	MEF2C-AS1	0.655302	0.505455	0	0	0.627057	33.6653	9.02092
ACKR1+ VEC	DNAJC18	0.488333	0.433632	0	0	0.626996	29.0931	4.06739
ACKR1+ VEC	NLRP1	0.740303	0.461743	0	0	0.626501	41.6478	18.0734
ACKR1+ VEC	FAT4	0.69665	0.468111	0	0	0.625936	38.4488	14.429
ACKR1+ VEC	CFI	0.588015	0.415033	0	0	0.625909	35.7326	10.6159
ACKR1+ VEC	MLLT3	0.791732	0.516888	0	0	0.625308	39.9577	17.011
ACKR1+ VEC	ZFAND3	1.41989	0.52263	0	0	0.625174	64.6748	45.5456
ACKR1+ VEC	ADGRG6	0.586809	0.462064	0	0	0.624953	32.1714	7.54288
ACKR1+ VEC	TMCC3	0.552488	0.449408	0	0	0.624539	31.6131	7.50159
ACKR1+ VEC	SSBP2	1.39793	0.541203	0	0	0.624228	62.3661	44.6386
ACKR1+ VEC	RASIP1	0.423236	0.386902	0	0	0.624132	27.1918	2.38534
ACKR1+ VEC	TRABD2B	0.520029	0.479127	0	0	0.623685	27.2069	2.74652
ACKR1+ VEC	RPGR	0.578717	0.456899	0	0	0.623525	32.4581	8.73641
ACKR1+ VEC	NPAS3	1.18609	0.599872	0	0	0.623294	49.585	27.5103
ACKR1+ VEC	CDC42BPB	0.731219	0.442331	0	0	0.623141	42.5985	20.8602
ACKR1+ VEC	ZNF366	0.431938	0.405223	0	0	0.622333	26.0902	1.63348
ACKR1+ VEC	PTPN12	0.964959	0.459671	0	0	0.621014	51.773	32.8348
ACKR1+ VEC	ITGA5	0.551068	0.406362	0	0	0.620815	34.118	11.1714
ACKR1+ VEC	CD59	0.858732	0.47911	0	0	0.620377	44.8317	24.5914
ACKR1+ VEC	EHD4	0.588613	0.437221	0	0	0.620016	33.9218	11.5017
ACKR1+ VEC	ARAP3	0.415354	0.37627	0	0	0.619538	26.3619	2.43634
ACKR1+ VEC	TSPAN18	0.4491	0.383416	0	0	0.618761	28.067	4.48062
ACKR1+ VEC	CLU	1.09522	0.557154	0	0	0.618593	48.6193	28.0849
ACKR1+ VEC	PXN	0.707078	0.417065	0	0	0.618217	41.7233	20.4084
ACKR1+ VEC	MSRB3	0.829188	0.450417	0	0	0.618076	44.53	23.258
ACKR1+ VEC	ID1	0.659916	0.451746	0	0	0.617751	35.2346	12.5196
ACKR1+ VEC	SMYD3	1.2318	0.524828	0	0	0.617739	54.9117	34.7475
ACKR1+ VEC	CARD8	0.676223	0.410994	0	0	0.617587	40.1388	18.4186
ACKR1+ VEC	TMEM135	1.03585	0.468018	0	0	0.617519	52.1201	31.1614
ACKR1+ VEC	BICD1	0.683223	0.427089	0	0	0.617007	38.4035	16.1467
ACKR1+ VEC	CNKSR3	0.542323	0.455234	0	0	0.616858	28.6857	5.84902
ACKR1+ VEC	CAMTA1	0.760386	0.437974	0	0	0.616825	42.9757	23.2681
ACKR1+ VEC	ARHGEF15	0.38117	0.355339	0	0	0.616435	24.9434	1.63834
ACKR1+ VEC	CTTNBP2NL	0.603661	0.406908	0	0	0.616435	35.9891	13.9866
ACKR1+ VEC	SHE	0.449314	0.361353	0	0	0.61615	29.2138	6.20466
ACKR1+ VEC	AFAP1	0.597916	0.415416	0	0	0.615865	34.8725	12.995
ACKR1+ VEC	SEMA6D	0.647345	0.49456	0	0	0.615648	31.5376	9.54621
ACKR1+ VEC	FZD6	0.489515	0.375857	0	0	0.615437	30.7681	8.21216
ACKR1+ VEC	ARHGEF28	0.715189	0.428917	0	0	0.615399	39.2938	17.502
ACKR1+ VEC	PRCP	0.595597	0.414576	0	0	0.615227	35.4308	14.7176
ACKR1+ VEC	PCDH19	0.408729	0.398812	0	0	0.61512	23.7061	0.73798
ACKR1+ VEC	EPB41L3	0.895975	0.460339	0	0	0.615025	46.6878	26.567
ACKR1+ VEC	ITGA9	0.680256	0.428871	0	0	0.614755	37.3019	15.372
ACKR1+ VEC	SH2D3C	0.436044	0.368753	0	0	0.61458	27.0862	4.17183
ACKR1+ VEC	GNA14	0.545106	0.424506	0	0	0.612595	29.8627	8.08656
ACKR1+ VEC	ADGRL2	0.661557	0.429458	0	0	0.612387	36.0797	15.0653
ACKR1+ VEC	RUNX1T1	1.07034	0.484354	0	0	0.612292	50.6413	32.1131
ACKR1+ VEC	EPHB4	0.368776	0.332187	0	0	0.61216	25.0943	2.7722
ACKR1+ VEC	CLEC14A	0.434808	0.370244	0	0	0.611405	26.211	3.98412
ACKR1+ VEC	STIM2	0.719976	0.403621	0	0	0.610683	41.2706	21.4615
ACKR1+ VEC	PLXNA2	0.617067	0.395257	0	0	0.610329	35.461	14.1906
ACKR1+ VEC	PIK3C2B	0.536541	0.397112	0	0	0.610275	30.9944	9.86854
ACKR1+ VEC	PLXND1	0.60019	0.375896	0	0	0.610063	36.4569	15.5795
ACKR1+ VEC	NEDD9	0.721505	0.43597	0	0	0.610057	38.4639	18.5154
ACKR1+ VEC	RASSF9	0.39733	0.360198	0	0	0.609961	24.6869	2.93319
ACKR1+ VEC	FCHO2	0.836218	0.406847	0	0	0.609817	46.4765	27.2397
ACKR1+ VEC	NLK	0.700534	0.410248	0	0	0.609163	38.4337	17.9936
ACKR1+ VEC	DDX60L	0.591022	0.389197	0	0	0.609134	34.4802	13.819
ACKR1+ VEC	FAM120B	0.771546	0.400215	0	0	0.608896	43.2322	24.2611
ACKR1+ VEC	SPATA6L	0.421079	0.366418	0	0	0.608848	25.381	3.84465
ACKR1+ VEC	BCAM	0.404456	0.347615	0	0	0.608258	25.3508	3.79885
ACKR1+ VEC	LINC02147	0.651212	0.610852	0	0	0.60787	23.193	1.72959
ACKR1+ VEC	MYCT1	0.350195	0.321594	0	0	0.607792	23.4193	1.83021
ACKR1+ VEC	IKBKB	0.614515	0.367915	0	0	0.607635	37.5283	17.511
ACKR1+ VEC	GIPC2	0.428014	0.352679	0	0	0.607513	26.4222	5.11486
ACKR1+ VEC	CDH23	0.617738	0.429004	0	0	0.607124	32.5638	12.5609
ACKR1+ VEC	LPCAT4	0.375649	0.328671	0	0	0.60712	24.9434	3.77699
ACKR1+ VEC	MGST2	0.553198	0.3671	0	0	0.606981	33.8917	13.8475
ACKR1+ VEC	HLA-DRB1	0.864699	0.388556	0	0	0.606447	43.866	22.0811
ACKR1+ VEC	PPFIBP1	0.797008	0.376072	0	0	0.606074	45.043	24.6632
ACKR1+ VEC	MVB12B	0.550923	0.371381	0	0	0.605817	32.4279	12.1557
ACKR1+ VEC	SEMA3E	0.443356	0.396489	0	0	0.605806	24.1889	3.31206
ACKR1+ VEC	ESAM	0.358892	0.313482	0	0	0.605739	24.038	2.80273
ACKR1+ VEC	SEC14L1	0.754127	0.397817	0	0	0.605416	42.1458	23.9821
ACKR1+ VEC	SAMD12	0.637673	0.401218	0	0	0.605161	33.7106	12.9155
ACKR1+ VEC	CCDC68	0.353557	0.322004	0	0	0.604622	23.027	2.13483
ACKR1+ VEC	NEURL1B	0.384857	0.3467	0	0	0.603887	23.0874	2.32185
ACKR1+ VEC	CTBP2	0.765607	0.38585	0	0	0.603629	43.021	24.7711
ACKR1+ VEC	EGLN1	0.557077	0.377912	0	0	0.602821	32.6392	13.6299
ACKR1+ VEC	BMX	0.394606	0.361438	0	0	0.602748	22.6498	2.20284
ACKR1+ VEC	ELN	0.842347	0.429961	0	0	0.602361	42.1156	24.3707
ACKR1+ VEC	NOD1	0.520265	0.35127	0	0	0.60198	31.2811	11.6797
ACKR1+ VEC	GRK5	0.766506	0.423069	0	0	0.601466	39.2485	21.0278
ACKR1+ VEC	LDLRAD3	0.622929	0.418713	0	0	0.601453	32.1714	13.5404
ACKR1+ VEC	ABCG1	0.412755	0.330943	0	0	0.601138	25.7432	5.80878
ACKR1+ VEC	CLIC4	0.73926	0.382406	0	0	0.600814	41.0442	23.1421
ACKR1+ VEC	PPP2R5A	0.724534	0.364438	0	0	0.600758	41.6025	23.5217
ACKR1+ VEC	CD109	0.520889	0.348085	0	0	0.60063	31.5226	12.4013
ACKR1+ VEC	FRMD3	0.478369	0.366544	0	0	0.60061	26.6486	6.7761
ACKR1+ VEC	ABCC4	0.440089	0.33972	0	0	0.600578	26.3769	6.46661
ACKR1+ VEC	ZNF462	0.593867	0.362324	0	0	0.600195	34.3594	15.4806
ACKR1+ VEC	CNTNAP3	0.38398	0.339808	0	0	0.599963	22.8459	2.98003
ACKR1+ VEC	TMEM255B	0.312724	0.288155	0	0	0.599718	21.7595	1.87288
ACKR1+ VEC	BCR	0.507228	0.338247	0	0	0.599427	31.3415	12.4558
ACKR1+ VEC	ZHX3	0.689568	0.384305	0	0	0.599426	37.9357	20.2003
ACKR1+ VEC	IFI44L	0.42003	0.34169	0	0	0.599216	24.6416	4.91675
ACKR1+ VEC	MYO10	0.428773	0.328112	0	0	0.599054	25.8488	6.03465
ACKR1+ VEC	ADAMTS18	0.461459	0.424632	0	0	0.598901	21.6388	1.92319
ACKR1+ VEC	UCK2	0.380188	0.321134	0	0	0.598439	23.9626	4.60622
ACKR1+ VEC	AGMO	0.469351	0.382671	0	0	0.598428	24.6265	5.22658
ACKR1+ VEC	CHSY1	0.517915	0.346533	0	0	0.598224	31.1453	12.664
ACKR1+ VEC	HYAL2	0.385977	0.3234	0	0	0.597975	23.9475	4.643
ACKR1+ VEC	NRP2	0.549217	0.334368	0	0	0.597616	32.6543	13.582
ACKR1+ VEC	LAMA5	0.350877	0.294004	0	0	0.596833	23.4193	4.18467
ACKR1+ VEC	SAMD5	0.424878	0.369576	0	0	0.596707	22.7403	3.68956
ACKR1+ VEC	CEP68	0.525208	0.328776	0	0	0.596568	32.8505	14.8578
ACKR1+ VEC	RAB27A	0.511714	0.329671	0	0	0.596392	31.1755	12.7636
ACKR1+ VEC	CDC42EP3	0.467272	0.323078	0	0	0.595278	28.5046	10.0247
ACKR1+ VEC	ZNRF1	0.463015	0.320363	0	0	0.594767	28.9875	10.9313
ACKR1+ VEC	FBXO31	0.444176	0.341055	0	0	0.594526	26.211	8.12819
ACKR1+ VEC	TNFRSF10D	0.350024	0.300906	0	0	0.593499	22.1669	3.65278
ACKR1+ VEC	PML	0.430059	0.3004	0	0	0.593473	27.9614	9.93342
ACKR1+ VEC	SMAD9	0.370619	0.298683	0	0	0.593471	23.525	4.99134
ACKR1+ VEC	RASGRF2	0.545584	0.341636	0	0	0.59331	30.0136	11.5926
ACKR1+ VEC	LHFPL2	0.48725	0.322348	0	0	0.593203	29.6967	11.9364
ACKR1+ VEC	GFOD2	0.359016	0.290438	0	0	0.592718	23.6457	5.424
ACKR1+ VEC	ESR2	0.507705	0.355646	0	0	0.59213	27.569	9.82725
ACKR1+ VEC	LARGE1	0.682489	0.367876	0	0	0.592063	35.5364	18.1466
ACKR1+ VEC	AFAP1L1	0.411993	0.299756	0	0	0.591843	26.1959	8.32041
ACKR1+ VEC	PDLIM1	0.646105	0.384264	0	0	0.591831	33.8917	18.0269
ACKR1+ VEC	YES1	0.533012	0.318325	0	0	0.591818	32.3827	15.1218
ACKR1+ VEC	MYO6	0.544636	0.314525	0	0	0.591784	33.3182	16.1232
ACKR1+ VEC	GALNT10	0.575182	0.326535	0	0	0.591354	33.9369	16.952
ACKR1+ VEC	NTN4	0.450258	0.331884	0	0	0.591258	25.8186	8.06644
ACKR1+ VEC	ATP11C	0.513931	0.317046	0	0	0.591141	31.3868	14.2378
ACKR1+ VEC	GIMAP7	0.452086	0.301858	0	0	0.590677	27.1767	9.05214
ACKR1+ VEC	SNCAIP	0.509114	0.335509	0	0	0.590619	28.0217	10.2339
ACKR1+ VEC	ST8SIA6	0.396244	0.36764	0	0	0.590608	19.6771	1.62654
ACKR1+ VEC	GPM6A	0.645	0.451114	0	0	0.590288	26.9353	9.57258
ACKR1+ VEC	DLGAP1	0.554423	0.401613	0	0	0.590204	26.3619	9.12188
ACKR1+ VEC	LNX1	0.413188	0.333787	0	0	0.590076	22.6347	4.78386
ACKR1+ VEC	ADARB1	0.47701	0.299663	0	0	0.589883	29.7571	12.4967
ACKR1+ VEC	HOXD3	0.317986	0.283752	0	0	0.58988	20.3863	2.51059
ACKR1+ VEC	PARVB	0.510165	0.322123	0	0	0.589619	30.7832	14.2326
ACKR1+ VEC	PIK3R3	0.368661	0.313354	0	0	0.589525	21.0955	3.20694
ACKR1+ VEC	DNAH14	0.468229	0.325739	0	0	0.588532	26.4524	9.35157
ACKR1+ VEC	CCM2L	0.278059	0.256683	0	0	0.588393	19.1037	1.40865
ACKR1+ VEC	SLC1A1	0.355005	0.301708	0	0	0.588048	21.1106	3.65937
ACKR1+ VEC	POSTN	0.490696	0.398463	0	0	0.587963	22.0462	4.63918
ACKR1+ VEC	TSPAN7	0.307259	0.285225	0	0	0.58782	19.0735	1.57415
ACKR1+ VEC	BMP6	0.400527	0.342614	0	0	0.587397	20.6428	3.24198
ACKR1+ VEC	NRN1	0.318677	0.268558	0	0	0.587367	21.3068	4.11458
ACKR1+ VEC	TM6SF1	0.354161	0.276751	0	0	0.587345	22.7554	5.46286
ACKR1+ VEC	SLF1	0.476173	0.34298	0	0	0.587181	25.8941	9.27212
ACKR1+ VEC	BAIAP2L1	0.379127	0.284343	0	0	0.586878	23.4495	6.19945
ACKR1+ VEC	SEMA3F	0.283867	0.262823	0	0	0.586608	18.8321	1.55333
ACKR1+ VEC	NR2F2	0.442352	0.285223	0	0	0.586591	28.0066	11.3795
ACKR1+ VEC	CLIC2	0.371371	0.278286	0	0	0.586189	24.2493	7.56057
ACKR1+ VEC	APOL3	0.424761	0.274099	0	0	0.586133	27.7048	11.0249
ACKR1+ VEC	TJP2	0.498104	0.300584	0	0	0.585975	29.7269	13.335
ACKR1+ VEC	PPM1F	0.369048	0.272573	0	0	0.585964	24.3247	7.59908
ACKR1+ VEC	LRIG1	0.49381	0.304534	0	0	0.585694	29.1233	12.7365
ACKR1+ VEC	JCAD	0.301803	0.25432	0	0	0.585535	20.2656	3.14795
ACKR1+ VEC	TNFRSF10A	0.29252	0.254056	0	0	0.585418	19.9034	2.91063
ACKR1+ VEC	SCARF1	0.298484	0.251315	0	0	0.585282	20.7183	3.83632
ACKR1+ VEC	CPD	0.493186	0.296105	0	0	0.585059	30.5266	14.8644
ACKR1+ VEC	FANCL	0.442292	0.282796	0	0	0.584695	27.901	11.8181
ACKR1+ VEC	DISC1	0.548401	0.308527	0	0	0.584522	30.3154	13.5747
ACKR1+ VEC	TMEM44	0.290428	0.245181	0	0	0.584325	20.2052	3.43003
ACKR1+ VEC	CAVIN2	0.437558	0.322328	0	0	0.584124	23.4797	6.93327
ACKR1+ VEC	TRPM6	0.286994	0.27392	0	0	0.583805	17.6249	0.884744
ACKR1+ VEC	ECSCR	0.272768	0.251556	0	0	0.583429	18.0927	1.40761
ACKR1+ VEC	MMRN1	0.365885	0.322073	0	0	0.5832	18.6962	2.01583
ACKR1+ VEC	NECTIN2	0.388236	0.271389	0	0	0.582997	25.2905	9.39494
ACKR1+ VEC	LINC01515	0.451666	0.328158	0	0	0.582437	23.1779	6.93327
ACKR1+ VEC	LRP5	0.409119	0.267146	0	0	0.582379	26.7089	10.9497
ACKR1+ VEC	INPP1	0.334123	0.252119	0	0	0.582219	22.7856	6.75736
ACKR1+ VEC	RGS3	0.318239	0.247492	0	0	0.581693	21.3671	5.16829
ACKR1+ VEC	SLC44A2	0.426493	0.266009	0	0	0.581308	27.6747	12.1827
ACKR1+ VEC	RNF220	0.41528	0.312452	0	0	0.581152	23.4043	7.95749
ACKR1+ VEC	HRH1	0.467912	0.276402	0	0	0.580834	26.6938	10.3865
ACKR1+ VEC	PRKD2	0.365409	0.26094	0	0	0.580632	23.4193	7.61192
ACKR1+ VEC	TSPAN12	0.251195	0.232518	0	0	0.580598	17.5645	1.49435
ACKR1+ VEC	EDN1	0.344544	0.322205	0	0	0.580493	17.4287	1.39547
ACKR1+ VEC	CORO2A	0.270478	0.248825	0	0	0.579156	17.3834	1.61127
ACKR1+ VEC	NOVA2	0.248336	0.219217	0	0	0.57888	17.9418	2.19312
ACKR1+ VEC	CASP10	0.331252	0.239397	0	0	0.578476	22.2273	6.73342
ACKR1+ VEC	SNCG	0.292403	0.23937	0	0	0.577924	19.5564	4.17287
ACKR1+ VEC	FAM124A	0.252294	0.232948	0	0	0.577844	17.0213	1.5006
ACKR1+ VEC	MCAM	0.42946	0.263023	0	0	0.577528	26.3166	11.2591
ACKR1+ VEC	ASRGL1	0.27169	0.24125	0	0	0.576631	17.474	2.21082
ACKR1+ VEC	ITGA2	0.272721	0.240516	0	0	0.57648	17.4891	2.241
ACKR1+ VEC	FMNL3	0.328713	0.238381	0	0	0.57566	21.0955	6.05546
ACKR1+ VEC	LTBP1	0.404624	0.28565	0	0	0.575154	22.1971	7.51616
ACKR1+ VEC	LMO2	0.282072	0.225357	0	0	0.574585	19.3451	4.67735
ACKR1+ VEC	PCDH17	0.265213	0.240872	0	0	0.574494	16.478	1.60191
ACKR1+ VEC	APOLD1	0.410817	0.278784	0	0	0.573811	22.348	7.82426
ACKR1+ VEC	DOCK6	0.375202	0.243986	0	0	0.573804	23.6608	9.28773
ACKR1+ VEC	ABHD6	0.329507	0.255195	0	0	0.573425	20.0694	5.75916
ACKR1+ VEC	DAB2IP	0.337515	0.230507	0	0	0.573415	22.2725	7.88741
ACKR1+ VEC	LRRC32	0.275757	0.229276	0	0	0.573383	18.1077	3.58998
ACKR1+ VEC	S1PR1	0.269269	0.214073	0	0	0.573334	18.4548	3.78219
ACKR1+ VEC	PKN3	0.255482	0.217688	0	0	0.573254	17.308	2.69448
ACKR1+ VEC	CYSLTR1	0.28129	0.241813	0	0	0.57314	17.3985	2.88704
ACKR1+ VEC	BAALC-AS1	0.29956	0.254268	0	0	0.572691	17.4438	3.00917
ACKR1+ VEC	MYO15B	0.375454	0.232658	0	0	0.572104	24.1437	10.0281
ACKR1+ VEC	RPH3AL	0.33861	0.233345	0	0	0.57197	21.3973	7.1973
ACKR1+ VEC	NOS3	0.218661	0.20685	0	0	0.571643	15.1652	0.841027
ACKR1+ VEC	EFNB2	0.345124	0.236889	0	0	0.571612	20.8843	6.5995
ACKR1+ VEC	NOTCH1	0.308799	0.213295	0	0	0.571334	21.4426	7.44607
ACKR1+ VEC	CIITA	0.303632	0.224081	0	0	0.571025	19.5262	5.42435
ACKR1+ VEC	MLKL	0.282326	0.219151	0	0	0.570742	18.651	4.62253
ACKR1+ VEC	KLHL2	0.357712	0.231237	0	0	0.570682	23.2534	9.64926
ACKR1+ VEC	MBOAT2	0.312429	0.236403	0	0	0.570401	19.2093	5.34038
ACKR1+ VEC	NREP	0.347987	0.234058	0	0	0.570335	21.9858	8.33221
ACKR1+ VEC	IFI44	0.357172	0.224952	0	0	0.570332	23.3741	9.68222
ACKR1+ VEC	THSD1	0.243142	0.206137	0	0	0.570078	16.7497	2.81279
ACKR1+ VEC	CASZ1	0.238551	0.209315	0	0	0.57007	16.1008	2.12477
ACKR1+ VEC	TMEM178B	0.321704	0.269297	0	0	0.569764	17.2476	3.48693
ACKR1+ VEC	ELMO1-AS1	0.29623	0.243756	0	0	0.569443	17.0665	3.23816
ACKR1+ VEC	NLRC5	0.37132	0.232382	0	0	0.569251	22.861	9.31167
ACKR1+ VEC	LIMK2	0.343814	0.229536	0	0	0.569034	21.8047	8.39327
ACKR1+ VEC	NUDCD1	0.325256	0.214567	0	0	0.568825	21.9556	8.55981
ACKR1+ VEC	ICAM1	0.487403	0.345291	0	0	0.568016	21.85	9.00253
ACKR1+ VEC	C6orf141	0.24024	0.221805	0	0	0.567815	14.6371	1.05753
ACKR1+ VEC	AIM2	0.25192	0.23733	0	0	0.567772	14.5616	1.05857
ACKR1+ VEC	TINAGL1	0.2558	0.193332	0	0	0.567651	17.4589	3.82556
ACKR1+ VEC	SLC7A1	0.276612	0.220081	0	0	0.56737	17.655	4.39666
ACKR1+ VEC	ZBTB46	0.345911	0.218253	0	0	0.566984	21.2615	7.89677
ACKR1+ VEC	TRIM25	0.309463	0.208138	0	0	0.566843	21.005	7.99045
ACKR1+ VEC	FAM110D	0.200429	0.189228	0	0	0.56628	14.0184	0.757757
ACKR1+ VEC	MAGI1-AS1	0.313685	0.248855	0	0	0.566241	17.655	4.70684
ACKR1+ VEC	CPLX1	0.215988	0.184584	0	0	0.566237	15.5425	2.30727
ACKR1+ VEC	PARP12	0.273788	0.192697	0	0	0.565673	19.1037	6.10196
ACKR1+ VEC	RNF165	0.257864	0.219088	0	0	0.565269	15.5877	2.59455
ACKR1+ VEC	PRKAR1B	0.272128	0.202011	0	0	0.565195	17.987	5.0649
ACKR1+ VEC	PKP4-AS1	0.245191	0.217824	0	0	0.565172	14.8483	1.86004
ACKR1+ VEC	TPD52	0.314088	0.211068	0	0	0.565114	19.9034	7.07726
ACKR1+ VEC	ADGRA2	0.29813	0.203012	0	0	0.564925	20.3561	7.78124
ACKR1+ VEC	HAPLN3	0.20011	0.179946	0	0	0.564742	14.5013	1.58074
ACKR1+ VEC	F8	0.294324	0.215527	0	0	0.564594	18.153	5.38757
ACKR1+ VEC	MPZL2	0.183802	0.176618	0	0	0.564548	13.4752	0.575604
ACKR1+ VEC	OLFM1	0.230508	0.205817	0	0	0.564519	15.0596	2.32913
ACKR1+ VEC	DGKE	0.295065	0.200216	0	0	0.564442	19.3904	6.61927
ACKR1+ VEC	ABCB1	0.357646	0.276104	0	0	0.564094	17.6249	5.06698
ACKR1+ VEC	PCDH1	0.193983	0.174398	0	0	0.563917	14.1693	1.37396
ACKR1+ VEC	GBP4	0.242627	0.188008	0	0	0.563858	16.8553	4.16385
ACKR1+ VEC	DLL1	0.220351	0.185231	0	0	0.563574	15.4067	2.76075
ACKR1+ VEC	FAM189A2	0.223888	0.192282	0	0	0.563255	14.8634	2.23996
ACKR1+ VEC	CERNA1	0.239303	0.214807	0	0	0.563215	14.1995	1.58733
ACKR1+ VEC	PEAR1	0.212824	0.174323	0	0	0.562856	15.3765	2.818
ACKR1+ VEC	DYSF	0.269277	0.21255	0	0	0.562349	15.8594	3.40852
ACKR1+ VEC	SOCS2	0.250932	0.195265	0	0	0.561982	16.4026	4.11458
ACKR1+ VEC	MFAP3	0.302516	0.211288	0	0	0.561968	18.8924	6.8389
ACKR1+ VEC	PALD1	0.233902	0.193996	0	0	0.561653	15.0747	2.79891
ACKR1+ VEC	ADARB2	0.298447	0.278055	0	0	0.561645	13.5506	1.3063
ACKR1+ VEC	RUNDC3B	0.30534	0.252736	0	0	0.561565	15.7085	3.61322
ACKR1+ VEC	PITPNM3	0.218317	0.191312	0	0	0.56156	14.29	2.0363
ACKR1+ VEC	ENDOD1	0.229941	0.172217	0	0	0.561345	16.7949	4.62738
ACKR1+ VEC	KL	0.20223	0.181069	0	0	0.56089	13.611	1.43433
ACKR1+ VEC	ARFGEF3	0.250472	0.184622	0	0	0.559899	16.2668	4.28043
ACKR1+ VEC	VCAM1	0.282531	0.229177	0	0	0.559704	15.5425	3.78115
ACKR1+ VEC	ABCG2	0.188713	0.172395	0	0	0.559612	13.0828	1.16717
ACKR1+ VEC	NXPE3	0.230302	0.1745	0	0	0.559106	16.0404	4.32865
ACKR1+ VEC	HSPA12B	0.201523	0.166218	0	0	0.558674	14.4711	2.79059
ACKR1+ VEC	GIMAP4	0.266279	0.176845	0	0	0.558491	17.7154	6.0395
ACKR1+ VEC	IL6	0.346767	0.286822	0	0	0.557903	14.9389	3.5532
ACKR1+ VEC	HID1	0.175637	0.161814	0	0	0.557645	12.5094	0.97981
ACKR1+ VEC	STC1	0.261156	0.248787	0	0	0.557618	12.268	0.777534
ACKR1+ VEC	TESC	0.197484	0.171044	0	0	0.557224	13.3997	1.99224
ACKR1+ VEC	AFAP1L2	0.212985	0.17455	0	0	0.557107	14.1542	2.78052
ACKR1+ VEC	P3H2	0.247752	0.195681	0	0	0.556899	14.4862	3.1254
ACKR1+ VEC	RBP7	0.271614	0.180849	0	0	0.556752	16.1913	4.76651
ACKR1+ VEC	THBD	0.279994	0.208188	0	0	0.556407	15.7537	4.60691
ACKR1+ VEC	ABLIM2	0.245194	0.185513	0	0	0.556207	15.3463	4.22457
ACKR1+ VEC	APLNR	0.17582	0.167938	0	0	0.556091	11.7248	0.503437
ACKR1+ VEC	CARD10	0.166314	0.150868	0	0	0.555487	12.2529	1.15953
ACKR1+ VEC	PLK2	0.22779	0.169836	0	0	0.555215	15.7688	4.9504
ACKR1+ VEC	PARM1	0.242984	0.190901	0	0	0.5551	14.1089	3.10667
ACKR1+ VEC	SLCO4A1	0.192708	0.167077	0	0	0.554939	13.1281	2.23372
ACKR1+ VEC	CFAP161	0.221695	0.188529	0	0	0.554565	13.0828	2.22713
ACKR1+ VEC	GNA14-AS1	0.268761	0.210167	0	0	0.554129	14.4711	3.78532
ACKR1+ VEC	BCAR1	0.212256	0.155174	0	0	0.553503	15.3161	4.75402
ACKR1+ VEC	CCL14	0.189936	0.180464	0	0	0.553295	11.2872	0.641526
ACKR1+ VEC	GIMAP6	0.168007	0.14201	0	0	0.553143	12.5849	1.95476
ACKR1+ VEC	TNFAIP1	0.195954	0.145717	0	0	0.552832	14.7427	4.28112
ACKR1+ VEC	LINC01117	0.179242	0.154004	0	0	0.552033	12.268	1.89231
ACKR1+ VEC	TGM2	0.223645	0.17658	0	0	0.552005	13.611	3.30096
ACKR1+ VEC	ADGRF5	0.240466	0.148118	0	0	0.552	15.286	4.6489
ACKR1+ VEC	BAALC	0.19559	0.167	0	0	0.551945	12.2529	1.88121
ACKR1+ VEC	TRIB2	0.184923	0.136909	0	0	0.551874	13.9581	3.56847
ACKR1+ VEC	ADAM23	0.188009	0.165597	0	0	0.55152	11.7399	1.44855
ACKR1+ VEC	TBC1D30	0.17399	0.157893	0	0	0.551145	11.4079	1.20637
ACKR1+ VEC	TAOK2	0.2019	0.145845	0	0	0.551061	14.7125	4.60379
ACKR1+ VEC	KCNMB3	0.206845	0.153886	0	0	0.550993	14.3806	4.31304
ACKR1+ VEC	DSG2	0.199543	0.144793	0	0	0.550586	13.8826	3.75929
ACKR1+ VEC	RNF122	0.218982	0.181553	0	0	0.550252	12.9621	3.06364
ACKR1+ VEC	C17orf67	0.21104	0.149286	0	0	0.549985	14.3655	4.414
ACKR1+ VEC	PCAT1	0.214938	0.166497	0	0	0.549582	13.1583	3.31831
ACKR1+ VEC	SPHK1	0.168589	0.144861	0	0	0.549574	11.9813	2.14837
ACKR1+ VEC	SEMA6B	0.16044	0.140002	0	0	0.549436	11.589	1.74936
ACKR1+ VEC	SOX18	0.166429	0.143076	0	0	0.54937	11.3173	1.41663
ACKR1+ VEC	SELE	0.258359	0.255141	0	0	0.549369	10.0951	0.236973
ACKR1+ VEC	CASC19	0.233442	0.189878	0	0	0.549353	12.3585	2.52551
ACKR1+ VEC	SGSM1	0.196514	0.157878	0	0	0.549292	12.4189	2.59004
ACKR1+ VEC	FOXC1	0.162094	0.141546	0	0	0.548603	11.5135	1.8597
ACKR1+ VEC	NRG3	0.289095	0.245536	0	0	0.548498	11.8606	2.24586
ACKR1+ VEC	ADAMTS4	0.243038	0.205826	0	0	0.548136	12.0567	2.54598
ACKR1+ VEC	CELSR1	0.173062	0.140241	0	0	0.547852	11.9058	2.35446
ACKR1+ VEC	LINC01876	0.263992	0.19476	0	0	0.546826	12.9169	3.59726
ACKR1+ VEC	STXBP5-AS1	0.189131	0.159856	0	0	0.54661	11.2268	1.94158
ACKR1+ VEC	ALS2CL	0.159584	0.133453	0	0	0.546373	11.2268	1.97558
ACKR1+ VEC	STEAP1B	0.200695	0.159083	0	0	0.54609	11.9662	2.80828
ACKR1+ VEC	HYAL1	0.158121	0.13384	0	0	0.545905	11.0608	1.91556
ACKR1+ VEC	PHKA1	0.188082	0.137577	0	0	0.545794	12.8112	3.70933
ACKR1+ VEC	MALL	0.128015	0.120322	0	0	0.545388	9.91399	0.875376
ACKR1+ VEC	MAPK11	0.136696	0.120273	0	0	0.54443	10.2611	1.3979
ACKR1+ VEC	ADGRG1	0.172339	0.122019	0	0	0.544331	12.1775	3.25169
ACKR1+ VEC	SHROOM2	0.169995	0.131406	0	0	0.543446	11.4381	2.77914
ACKR1+ VEC	GATA2-AS1	0.133925	0.115021	0	0	0.54335	10.0951	1.42531
ACKR1+ VEC	TAL1	0.120238	0.110309	0	0	0.542437	9.18968	0.694611
ACKR1+ VEC	SPAAR	0.169315	0.134028	0	0	0.54232	11.0457	2.64244
ACKR1+ VEC	SYT15	0.12426	0.116471	0	0	0.54229	9.12932	0.682814
ACKR1+ VEC	KCNN3	0.168057	0.127779	0	0	0.541692	10.7741	2.40616
ACKR1+ VEC	EFNA1	0.150597	0.111968	0	0	0.541477	11.0759	2.77359
ACKR1+ VEC	GABRA2	0.145242	0.140795	0	0	0.54141	8.58609	0.309834
ACKR1+ VEC	CNR1	0.128492	0.114007	0	0	0.54137	9.21986	0.934706
ACKR1+ VEC	TCF4-AS1	0.176706	0.14002	0	0	0.540961	10.427	2.24794
ACKR1+ VEC	CASKIN2	0.130411	0.106303	0	0	0.540023	9.91399	1.9218
ACKR1+ VEC	CA8	0.141663	0.125217	0	0	0.539878	9.0086	1.03151
ACKR1+ VEC	CSF2RB	0.133765	0.112588	0	0	0.539751	9.70273	1.79031
ACKR1+ VEC	TM4SF18	0.134762	0.114194	0	0	0.539486	9.14441	1.22476
ACKR1+ VEC	SMAGP	0.119997	0.0991799	0	0	0.539087	9.4462	1.6255
ACKR1+ VEC	EXOC3L2	0.112871	0.104175	0	0	0.538763	8.38992	0.635628
ACKR1+ VEC	GATA2	0.116705	0.0976052	0	0	0.538737	9.02369	1.25599
ACKR1+ VEC	ZNF385D-AS1	0.131947	0.125866	0	0	0.538489	8.07303	0.375756
ACKR1+ VEC	ARHGAP31-AS1	0.151672	0.12934	0	0	0.537957	9.23495	1.69073
ACKR1+ VEC	LINC01060	0.175558	0.145765	0	0	0.537679	9.35567	1.86247
ACKR1+ VEC	GIMAP5	0.131637	0.103069	0	0	0.537615	9.53674	2.00473
ACKR1+ VEC	ASXL3	0.132639	0.108915	0	0	0.536797	9.11423	1.77643
ACKR1+ VEC	SLC10A6	0.122333	0.111795	0	0	0.53648	8.07303	0.788983
ACKR1+ VEC	SOX7	0.10649	0.0934055	0	0	0.535696	8.07303	0.926726
ACKR1+ VEC	CHODL	0.171731	0.143069	0	0	0.534744	8.60118	1.68934
ACKR1+ VEC	CSF3	0.153386	0.149934	0	0	0.534669	7.15256	0.224482
ACKR1+ VEC	CRTAC1	0.113916	0.107704	0	0	0.532803	7.00166	0.44827
ACKR1+ VEC	C2CD4B	0.131795	0.120042	0	0	0.532794	7.28837	0.738674
ACKR1+ VEC	SCN11A	0.115704	0.097801	0	0	0.531179	7.55998	1.34481
ACKR1+ VEC	ST6GALNAC1	0.0860347	0.0807082	0	0	0.530769	6.54897	0.394145
ACKR1+ VEC	NDRG4	0.101567	0.0842885	0	0	0.529942	7.28837	1.30769
ACKR1+ VEC	PLA1A	0.0842866	0.0804327	0	0	0.529409	6.23208	0.356673
ACKR1+ VEC	CRACR2B	0.0904166	0.0763324	0	0	0.529307	7.01675	1.16231
ACKR1+ VEC	C1orf115	0.0799098	0.064724	0	0	0.528178	6.95639	1.32191
ACKR1+ VEC	ITGA10	0.0919778	0.081161	0	0	0.527648	6.36789	0.845885
ACKR1+ VEC	WSCD1	0.0904946	0.0757468	0	0	0.52704	6.47352	1.0662
ACKR1+ VEC	BCL6B	0.0825123	0.0740313	0	0	0.526163	5.83975	0.607871
ACKR1+ VEC	EPHA7	0.0838728	0.0808929	0	0	0.523819	4.96454	0.202624
ACKR1+ VEC	ST8SIA6-AS1	0.0759812	0.0709174	0	0	0.522748	4.874	0.324406
ACKR1+ VEC	DIPK2B	0.064881	0.0572877	0	0	0.521783	4.91927	0.562073
ACKR1+ VEC	HAGLR	0.0563446	0.0536415	0	0	0.521199	4.45149	0.211645
ACKR1+ VEC	MLIP-AS1	0.0761212	0.0725089	0	0	0.520499	4.37604	0.281036
ACKR1+ VEC	LRG1	0.0675104	0.0609029	0	0	0.520309	4.60238	0.546806
ACKR1+ VEC	LINC00113	0.0675619	0.0611428	0	0	0.520135	4.45149	0.424677
ACKR1+ VEC	CYTL1	0.0628277	0.0588977	0	0	0.519731	4.22514	0.279648
ACKR1+ VEC	LCN6	0.0481381	0.0450876	0	0	0.519614	4.17987	0.256749
ACKR1+ VEC	KLHL14	0.0656818	0.059142	0	0	0.519506	4.31568	0.413227
ACKR1+ VEC	CCL16	0.0528318	0.0518459	0	0	0.519038	3.87807	0.0704326
ACKR1+ VEC	AVPR2	0.0493724	0.0448159	0	0	0.518818	4.1346	0.370552
ACKR1+ VEC	KIF26A	0.0536078	0.0469973	0	0	0.518508	4.19496	0.491987
ACKR1+ VEC	PTPN5	0.0487316	0.0472716	0	0	0.517868	3.68191	0.108251
ACKR1+ VEC	CLEC20A	0.0641287	0.0570498	0	0	0.51757	3.9837	0.471516
ACKR1+ VEC	ADM5	0.0460479	0.0427087	0	0	0.517567	3.78754	0.27375
ACKR1+ VEC	TSPAN1	0.0522999	0.0499386	0	0	0.51729	3.65173	0.194991
ACKR1+ VEC	MRAP2	0.0501326	0.0473763	0	0	0.516693	3.56119	0.224135
ACKR1+ VEC	WNT9B	0.0466452	0.0448083	0	0	0.516284	3.3952	0.138783
ACKR1+ VEC	FAM167B	0.0365517	0.0322205	0	0	0.515602	3.50083	0.378879
ACKR1+ VEC	PNMT	0.0379699	0.0358859	0	0	0.515153	3.21412	0.183888
ACKR1+ VEC	ERICH4	0.0464518	0.0445111	0	0	0.514766	3.07832	0.124905
ACKR1+ VEC	LINC02197	0.0542204	0.0508697	0	0	0.514661	3.12359	0.191174
ACKR1+ VEC	IGSF23	0.0477335	0.0438121	0	0	0.514136	3.1085	0.282424
ACKR1+ VEC	LINC02389	0.0476535	0.0448288	0	0	0.513969	2.98778	0.194644
ACKR1+ VEC	OTC	0.0351943	0.0347261	0	0	0.511693	2.3691	0.0305323
ACKR1+ VEC	C3orf80	0.0251558	0.0244361	0	0	0.51126	2.30874	0.0565542
ACKR1+ VEC	BTBD17	0.0337096	0.0334543	0	0	0.510862	2.18802	0.0156131
ACKR1+ VEC	DLGAP1-AS5	0.0307173	0.0295016	0	0	0.508944	1.87113	0.0825761
ACKR1+ VEC	DNAJC5G	0.0284051	0.02737	0	0	0.508737	1.82586	0.0787596
ACKR1+ VEC	CX3CL1	0.0953205	0.0741042	4.77129e-308	1.24333e-306	0.527903	6.92621	1.3285
ACKR1+ VEC	IGFBP4	0.88745	0.399983	5.26284e-307	1.36815e-305	0.604424	46.6274	26.1222
ACKR1+ VEC	TAF15	0.946375	0.427273	9.54707e-307	2.476e-305	0.613135	51.2449	33.4003
ACKR1+ VEC	TECPR1	0.270218	0.183654	4.42229e-305	1.14148e-303	0.559495	18.4548	6.80594
ACKR1+ VEC	CYTH1	0.819523	0.383799	6.64136e-305	1.71023e-303	0.605277	46.0389	27.0437
ACKR1+ VEC	CPT1A	0.584412	0.313357	2.35417e-304	6.05512e-303	0.591606	35.793	18.6428
ACKR1+ VEC	CHD9	1.59301	0.512316	2.37363e-304	6.09799e-303	0.627499	71.4954	54.6019
ACKR1+ VEC	ALDH1A2	0.598466	0.296807	3.99263e-304	1.02452e-302	0.583459	32.2469	14.7832
ACKR1+ VEC	MRRF	0.403602	0.258961	9.25767e-304	2.37277e-302	0.574482	25.3357	11.3514
ACKR1+ VEC	CHD7	0.379049	0.238363	5.23526e-303	1.3371e-301	0.571005	23.8871	10.1933
ACKR1+ VEC	SCN3B	0.0653223	0.054627	2.19916e-302	5.61018e-301	0.520799	4.88909	0.724449
ACKR1+ VEC	L3MBTL4	0.711161	0.369317	2.88379e-302	7.34812e-301	0.593458	37.1963	19.8006
ACKR1+ VEC	OSMR	0.651793	0.346014	3.34239e-302	8.50674e-301	0.592601	36.638	19.3415
ACKR1+ VEC	HHEX	0.102828	0.0805766	1.68817e-301	4.28659e-300	0.53193	8.19375	1.81251
ACKR1+ VEC	CRIP2	0.332536	0.21435	1.50904e-300	3.82728e-299	0.564761	20.9899	8.3558
ACKR1+ VEC	HDAC7	0.574046	0.309216	1.38019e-299	3.49643e-298	0.591476	35.8684	18.963
ACKR1+ VEC	TBC1D22A	1.05447	0.441986	2.35626e-299	5.96218e-298	0.613119	53.9007	34.7257
ACKR1+ VEC	JAG2	0.101346	0.079191	2.72829e-299	6.89557e-298	0.529797	7.54489	1.57762
ACKR1+ VEC	ATG9B	0.0579644	0.0512701	3.39017e-299	8.55851e-298	0.517138	3.90825	0.482966
ACKR1+ VEC	LUZP1	0.578051	0.319684	1.58422e-298	3.99475e-297	0.590555	35.0083	18.573
ACKR1+ VEC	ARNTL2	0.166745	0.126857	2.64134e-296	6.62976e-295	0.539578	10.7741	2.91688
ACKR1+ VEC	CTNND1	0.547531	0.301862	2.3163e-295	5.79394e-294	0.589608	34.6763	18.3333
ACKR1+ VEC	SLC12A6	0.483508	0.281457	4.45708e-295	1.11361e-293	0.580758	29.4553	14.2104
ACKR1+ VEC	RB1	0.944474	0.426743	7.4181e-295	1.8513e-293	0.609285	49.7359	31.8702
ACKR1+ VEC	PRDM5	0.378538	0.237729	2.17641e-292	5.40685e-291	0.568551	23.0572	9.80643
ACKR1+ VEC	PTAFR	0.161968	0.120781	2.60634e-292	6.46758e-291	0.540543	11.1815	3.11638
ACKR1+ VEC	LEPR	0.574126	0.314544	9.49707e-292	2.354e-290	0.585678	32.775	16.638
ACKR1+ VEC	RND1	0.088079	0.0771738	4.02777e-290	9.94959e-289	0.523267	5.59831	0.965932
ACKR1+ VEC	PAM	1.1509	0.457602	7.19591e-290	1.77356e-288	0.615225	57.0092	39.1924
ACKR1+ VEC	MAP3K3	0.624821	0.329055	5.22316e-289	1.28444e-287	0.592984	37.4679	20.7436
ACKR1+ VEC	SMAD1-AS2	0.0896907	0.0762672	2.02372e-288	4.96539e-287	0.522091	5.28142	0.870172
ACKR1+ VEC	GPR17	0.0465104	0.041711	4.88151e-288	1.19638e-286	0.514117	3.15376	0.330651
ACKR1+ VEC	CADM3	0.226033	0.164968	6.89535e-287	1.68239e-285	0.548431	14.1542	4.65896
ACKR1+ VEC	GALNT15	0.506557	0.282657	2.63642e-286	6.4254e-285	0.578273	28.8668	13.6722
ACKR1+ VEC	ARRB1	0.564849	0.305655	1.65255e-284	4.00518e-283	0.586325	33.62	17.5009
ACKR1+ VEC	TNFSF10	0.602816	0.328561	4.3326e-284	1.04312e-282	0.589057	34.963	18.9817
ACKR1+ VEC	KLF8	0.320774	0.212916	3.00286e-283	7.20588e-282	0.56395	20.9144	8.69963
ACKR1+ VEC	RGS7BP	0.094959	0.0800593	4.45211e-283	1.06719e-281	0.524903	6.11136	1.14739
ACKR1+ VEC	FNIP2	0.676187	0.349177	1.6693e-282	3.997e-281	0.594191	38.826	22.1304
ACKR1+ VEC	NOTCH4	0.197431	0.126346	1.73267e-282	4.14416e-281	0.544457	12.947	3.93659
ACKR1+ VEC	ACER3	0.705657	0.353481	2.38511e-282	5.6922e-281	0.594153	39.2787	22.1124
ACKR1+ VEC	EXOC6B	1.2846	0.476871	1.6201e-281	3.84962e-280	0.614281	59.8763	40.0952
ACKR1+ VEC	DDX60	0.318153	0.196081	1.63387e-281	3.87814e-280	0.563391	21.0804	8.58167
ACKR1+ VEC	DIAPH2	1.46808	0.511513	1.82236e-281	4.32084e-280	0.61916	65.4142	47.5264
ACKR1+ VEC	TPST2	0.356788	0.217352	2.06356e-281	4.88211e-280	0.569514	24.038	10.584
ACKR1+ VEC	ADAMTS9-AS2	1.03996	0.468032	1.27061e-280	2.99635e-279	0.601034	45.8729	27.1009
ACKR1+ VEC	NHSL2	0.51055	0.254671	1.61308e-279	3.7917e-278	0.58091	31.7489	15.2259
ACKR1+ VEC	HLA-DRA	0.896943	0.357639	3.07382e-279	7.21754e-278	0.596391	42.9908	23.8874
ACKR1+ VEC	HIP1R	0.136146	0.098545	6.9426e-279	1.62842e-277	0.536348	9.88381	2.60045
ACKR1+ VEC	SLC5A4	0.0736668	0.0599256	9.64369e-278	2.2547e-276	0.52175	5.23616	0.878152
ACKR1+ VEC	CCND3	0.77805	0.372577	1.25304e-277	2.92648e-276	0.597472	42.3419	24.8766
ACKR1+ VEC	MYO18A	0.273707	0.1801	2.34734e-277	5.47637e-276	0.556622	17.9418	6.79449
ACKR1+ VEC	ABO	0.17872	0.122349	7.53347e-277	1.75382e-275	0.543141	12.434	3.7763
ACKR1+ VEC	CC2D2B	0.260469	0.177631	1.60516e-276	3.72893e-275	0.550578	15.3312	5.32824
ACKR1+ VEC	MSRA	0.573284	0.319357	1.0075e-275	2.33553e-274	0.584357	32.5487	17.2022
ACKR1+ VEC	ADD2	0.0862624	0.0707866	1.52877e-275	3.54017e-274	0.524344	5.99064	1.12657
ACKR1+ VEC	CD2AP	0.583921	0.310412	1.54724e-275	3.57915e-274	0.587891	35.1441	19.089
ACKR1+ VEC	RASA4B	0.0792271	0.0705602	6.56342e-275	1.51667e-273	0.519106	4.48167	0.673793
ACKR1+ VEC	SPIDR	1.25781	0.471542	6.62412e-274	1.52425e-272	0.612709	59.2123	40.1049
ACKR1+ VEC	CTNNA1	0.964318	0.403111	1.56507e-273	3.59753e-272	0.609238	52.8142	36.032
ACKR1+ VEC	HERC2	0.697407	0.350964	1.03182e-271	2.35442e-270	0.59571	40.5915	24.3985
ACKR1+ VEC	FZD4	0.509643	0.270628	1.12743e-271	2.56991e-270	0.582428	32.3223	16.5326
ACKR1+ VEC	SCAPER	0.970802	0.412703	8.32201e-271	1.893e-269	0.60588	50.415	33.037
ACKR1+ VEC	MPDZ	0.828765	0.366512	1.75718e-270	3.98872e-269	0.598198	44.9374	26.3411
ACKR1+ VEC	CTNNAL1	0.446065	0.263713	4.26645e-270	9.6746e-269	0.574374	27.0862	13.0047
ACKR1+ VEC	TDRP	0.225702	0.153117	4.47389e-270	1.01345e-268	0.549785	15.1501	5.28556
ACKR1+ VEC	VPS13A	0.693661	0.343535	6.43603e-270	1.45641e-268	0.593909	39.8069	23.3649
ACKR1+ VEC	ARID1B	1.58978	0.484215	3.61206e-269	8.1484e-268	0.620302	70.8465	55.81
ACKR1+ VEC	EFCC1	0.0889274	0.0717305	7.0344e-269	1.58525e-267	0.524577	6.09627	1.18139
ACKR1+ VEC	KLHL5	0.518072	0.291174	9.27501e-269	2.08587e-267	0.580104	30.4965	15.6333
ACKR1+ VEC	PDE10A	0.418526	0.244852	1.34172e-268	3.01432e-267	0.566811	23.359	10.2016
ACKR1+ VEC	OSBPL5	0.343306	0.212301	9.63368e-268	2.16208e-266	0.565323	22.348	9.73392
ACKR1+ VEC	LINC01090	0.200547	0.147131	1.95203e-267	4.37195e-266	0.540339	11.4079	3.40089
ACKR1+ VEC	DAAM1	0.956214	0.421362	3.65466e-267	8.15187e-266	0.604335	49.072	32.2314
ACKR1+ VEC	MED13L	1.68726	0.51066	4.67493e-267	1.0417e-265	0.620041	72.8987	56.3568
ACKR1+ VEC	PARP14	0.699709	0.338164	1.44848e-266	3.2243e-265	0.593671	40.5161	23.5959
ACKR1+ VEC	STXBP1	0.469387	0.271169	1.25763e-265	2.79662e-264	0.5781	29.3044	14.9185
ACKR1+ VEC	WWP1	0.93981	0.380548	7.77362e-264	1.72163e-262	0.60349	50.3244	32.0139
ACKR1+ VEC	MAPK12	0.0646364	0.0533789	2.23505e-263	4.94497e-262	0.522063	5.37196	0.961422
ACKR1+ VEC	TSNAX-DISC1	0.110341	0.089796	4.26243e-263	9.42092e-262	0.528004	7.16765	1.5967
ACKR1+ VEC	PTPRR	0.0978061	0.0824624	5.45139e-263	1.20366e-261	0.522026	5.35687	0.959687
ACKR1+ VEC	RASA4	0.0754375	0.0628861	1.37486e-262	3.02955e-261	0.525114	6.27735	1.27021
ACKR1+ VEC	LMCD1-AS1	0.621638	0.34364	2.64989e-260	5.81565e-259	0.579304	30.7077	15.8692
ACKR1+ VEC	GIMAP1	0.17317	0.118828	1.05878e-259	2.31903e-258	0.54265	12.4793	3.95533
ACKR1+ VEC	NCKAP1	0.700911	0.329663	1.30156e-259	2.84792e-258	0.594709	41.9194	25.2499
ACKR1+ VEC	PLCG1	0.260196	0.166508	7.33727e-259	1.60064e-257	0.554794	17.6701	6.83126
ACKR1+ VEC	BABAM2	0.793942	0.381218	1.94924e-258	4.24382e-257	0.594296	41.2706	25.1142
ACKR1+ VEC	KIF19	0.0432505	0.0390976	2.83728e-258	6.17109e-257	0.513712	3.09341	0.353551
ACKR1+ VEC	KCTD12	0.446635	0.26929	6.84972e-258	1.48538e-256	0.571418	25.8035	12.5006
ACKR1+ VEC	ARHGAP23	0.233748	0.153326	2.43428e-257	5.26833e-256	0.552672	16.7044	6.30701
ACKR1+ VEC	KMT2E	1.33529	0.438758	6.57999e-256	1.42124e-254	0.615933	64.2976	52.5298
ACKR1+ VEC	VCAN	0.756633	0.366175	6.96355e-255	1.50112e-253	0.586076	36.4569	20.0105
ACKR1+ VEC	SULT1C4	0.104114	0.0811325	7.71486e-255	1.66143e-253	0.528454	7.39399	1.71016
ACKR1+ VEC	GRAMD1C	0.213023	0.144087	2.44291e-254	5.25056e-253	0.545459	13.6864	4.6423
ACKR1+ VEC	RAPGEF2	0.816022	0.365949	8.60025e-254	1.84664e-252	0.596484	44.3489	27.5072
ACKR1+ VEC	ERC1	1.14682	0.424559	1.56676e-253	3.36083e-252	0.60771	57.2356	39.1973
ACKR1+ VEC	PIR	0.330025	0.215519	3.27558e-253	7.00576e-252	0.561011	20.5523	8.90156
ACKR1+ VEC	USHBP1	0.203034	0.138098	5.60265e-253	1.19594e-251	0.546151	13.9882	4.8248
ACKR1+ VEC	TEAD2	0.157452	0.117455	7.78608e-253	1.6604e-251	0.539647	11.3173	3.48763
ACKR1+ VEC	RFTN2	0.346243	0.220122	2.25432e-251	4.78868e-250	0.561689	21.0352	9.20064
ACKR1+ VEC	PRPSAP1	0.326974	0.206518	5.86543e-251	1.24474e-249	0.563934	22.1669	9.99657
ACKR1+ VEC	CRYBG3	0.703413	0.337178	9.36895e-251	1.98246e-249	0.591714	40.3954	24.2527
ACKR1+ VEC	SFMBT2	0.537804	0.267863	7.91419e-250	1.67139e-248	0.577731	31.2359	15.8841
ACKR1+ VEC	STOM	0.782889	0.376038	3.08293e-249	6.50453e-248	0.594948	42.1759	26.9986
ACKR1+ VEC	RIMKLB	0.486029	0.272	1.77062e-248	3.72855e-247	0.577239	29.9381	15.77
ACKR1+ VEC	STARD4-AS1	0.239424	0.168164	5.34156e-248	1.12373e-246	0.545729	13.8222	4.83764
ACKR1+ VEC	FAM107A	0.144448	0.105567	1.55076e-247	3.25302e-246	0.534739	9.62728	2.69413
ACKR1+ VEC	ANKRD17	1.19582	0.426974	1.2626e-246	2.64095e-245	0.608391	59.4236	42.3154
ACKR1+ VEC	GPR146	0.14825	0.10824	5.98899e-246	1.24911e-244	0.538596	11.0457	3.39464
ACKR1+ VEC	CNTLN	0.728808	0.34095	8.83196e-245	1.83505e-243	0.590414	40.3803	24.1088
ACKR1+ VEC	EIF4G3	1.15839	0.425648	2.43592e-244	5.05159e-243	0.606615	57.3864	40.4547
ACKR1+ VEC	XPR1	0.584256	0.294183	3.97008e-244	8.2175e-243	0.582648	34.3896	19.082
ACKR1+ VEC	HOXD1	0.0146888	0.0136808	4.58598e-244	9.48333e-243	0.507377	1.56934	0.0936788
ACKR1+ VEC	HPCAL1	0.454239	0.251499	7.81136e-244	1.61226e-242	0.572373	27.6445	13.7874
ACKR1+ VEC	NET1	0.394736	0.239425	8.26383e-243	1.70082e-241	0.567469	24.4153	11.7595
ACKR1+ VEC	RGS12	0.394072	0.229427	8.98755e-243	1.84803e-241	0.568727	25.3207	12.2743
ACKR1+ VEC	ITGA1	0.507887	0.248973	4.23746e-242	8.70493e-241	0.574946	30.1645	15.1062
ACKR1+ VEC	SUSD6	0.469244	0.26086	5.88802e-242	1.20843e-240	0.574583	28.912	14.9647
ACKR1+ VEC	RNF144A	0.4024	0.237121	6.97866e-242	1.43092e-240	0.565851	23.7815	11.1627
ACKR1+ VEC	KSR1	0.330954	0.199786	1.11204e-241	2.27589e-240	0.561336	21.4275	9.49972
ACKR1+ VEC	PTPN14	0.652136	0.301146	1.7082e-241	3.48943e-240	0.585637	37.7245	21.2033
ACKR1+ VEC	NEK3	0.283256	0.174032	5.43668e-241	1.1085e-239	0.557822	19.6771	8.34712
ACKR1+ VEC	LINC01801	0.05629	0.0477601	1.66264e-240	3.38686e-239	0.517066	4.02897	0.616198
ACKR1+ VEC	NBEA	0.584282	0.291882	1.80791e-240	3.67933e-239	0.579081	32.6392	17.3951
ACKR1+ VEC	LCLAT1	0.320099	0.19245	3.21016e-240	6.52702e-239	0.559114	20.4014	8.80164
ACKR1+ VEC	RAPGEF1	0.72084	0.328214	3.64904e-240	7.41248e-239	0.591328	41.7233	25.4674
ACKR1+ VEC	INPP5D	0.435116	0.222616	1.86202e-239	3.77889e-238	0.569449	26.724	12.7688
ACKR1+ VEC	SPINK5	0.0391181	0.0341135	7.73392e-239	1.56666e-237	0.513452	3.06323	0.371939
ACKR1+ VEC	VEZT	0.669478	0.322165	1.40058e-237	2.83452e-236	0.589139	39.5352	24.1865
ACKR1+ VEC	SUN1	0.685859	0.323505	1.72318e-237	3.48418e-236	0.591504	41.3611	26.0403
ACKR1+ VEC	ZNF33B	0.372635	0.217921	1.77034e-237	3.57622e-236	0.563991	23.0723	10.6766
ACKR1+ VEC	C21orf91	0.218249	0.144817	2.15758e-237	4.35444e-236	0.548898	15.4972	5.87019
ACKR1+ VEC	MBD5	1.27228	0.446307	2.62895e-237	5.30086e-236	0.606105	58.8954	42.0125
ACKR1+ VEC	TSPAN13	0.104369	0.0731446	7.29959e-237	1.46778e-235	0.529814	8.04285	2.04497
ACKR1+ VEC	ITGA3	0.204785	0.129963	8.42575e-237	1.69267e-235	0.545795	14.29	5.10341
ACKR1+ VEC	ZFPM2	1.7407	0.557596	2.00593e-236	4.02605e-235	0.608127	69.5186	45.5251
ACKR1+ VEC	FGF11	0.0418158	0.0378981	2.39708e-236	4.80671e-235	0.513102	2.97269	0.355632
ACKR1+ VEC	EXOC4	1.36967	0.455299	3.41667e-236	6.84495e-235	0.607738	62.683	45.0761
ACKR1+ VEC	GDF7	0.0257656	0.0240752	2.24061e-235	4.48061e-234	0.508457	1.82586	0.134967
ACKR1+ VEC	NFIA	1.8113	0.489237	2.43596e-235	4.8668e-234	0.613525	74.6492	59.1783
ACKR1+ VEC	BIRC6	1.26124	0.421019	1.66855e-234	3.32446e-233	0.608097	61.5965	46.4789
ACKR1+ VEC	TBC1D5	1.45429	0.465931	1.17469e-233	2.3341e-232	0.608768	65.6255	48.094
ACKR1+ VEC	VGLL4	0.842553	0.366353	1.26911e-232	2.51485e-231	0.595863	46.3709	30.7991
ACKR1+ VEC	CCL23	0.0283979	0.025769	3.07676e-232	6.08579e-231	0.510869	2.41437	0.241136
ACKR1+ VEC	GPHN	1.18633	0.426598	5.88973e-232	1.16393e-230	0.601723	56.2245	37.4944
ACKR1+ VEC	EEF2K	0.641017	0.316898	7.12152e-232	1.40608e-230	0.585096	37.0152	22.0534
ACKR1+ VEC	LINC01673	0.0336702	0.0309011	1.1818e-231	2.32916e-230	0.509577	2.09748	0.1825
ACKR1+ VEC	SHC1	0.292931	0.190132	1.90557e-231	3.74882e-230	0.558483	20.0694	8.97547
ACKR1+ VEC	TMEM87B	0.384629	0.217937	9.20052e-231	1.80839e-229	0.566452	24.8378	12.0492
ACKR1+ VEC	CCDC50	0.644101	0.310055	1.09312e-230	2.14663e-229	0.588449	39.4749	24.6785
ACKR1+ VEC	PRKCE	0.741784	0.33757	1.69778e-230	3.33104e-229	0.587992	40.2595	24.3291
ACKR1+ VEC	FLT4	0.0806688	0.0588265	3.20937e-230	6.29112e-229	0.523993	6.15663	1.33371
ACKR1+ VEC	TUSC3	0.347296	0.20305	2.60029e-229	5.08803e-228	0.560223	21.4577	9.68291
ACKR1+ VEC	MANSC1	0.141267	0.10252	6.30721e-229	1.23304e-227	0.537011	10.6987	3.35925
ACKR1+ VEC	ANO10	0.548034	0.286	9.31899e-229	1.8202e-227	0.578116	32.2469	17.9926
ACKR1+ VEC	PCBP1-AS1	0.539513	0.275636	3.83814e-227	7.46336e-226	0.57782	32.3676	17.9797
ACKR1+ VEC	GLCE	0.335852	0.208513	1.2552e-226	2.43859e-225	0.559981	21.171	9.73288
ACKR1+ VEC	CDKAL1	1.11468	0.403797	2.66442e-226	5.16722e-225	0.600988	55.0174	38.2341
ACKR1+ VEC	SLC41A3	0.191112	0.133349	1.44621e-225	2.79477e-224	0.544528	13.7921	5.07461
ACKR1+ VEC	CFLAR	1.29725	0.404362	5.28718e-225	1.01723e-223	0.6081	63.8449	51.2079
ACKR1+ VEC	TEAD1	1.02526	0.377219	9.65289e-225	1.85555e-223	0.597184	53.0708	33.901
ACKR1+ VEC	ABCD4	0.338977	0.204624	1.4761e-224	2.83498e-223	0.562424	22.6196	10.7744
ACKR1+ VEC	BAIAP2	0.278939	0.175745	4.84301e-224	9.27692e-223	0.554522	18.5604	7.95957
ACKR1+ VEC	CTD-3080P12.3	0.00726509	0.00716664	7.72391e-224	1.47694e-222	0.502685	0.543232	0.00624525
ACKR1+ VEC	SNED1	0.926358	0.364942	1.58526e-223	3.02598e-222	0.593209	47.0349	30.0282
ACKR1+ VEC	PIEZO1	0.423741	0.23303	3.67693e-222	7.0125e-221	0.570787	27.8708	14.6517
ACKR1+ VEC	PVT1	0.386475	0.218905	6.80312e-222	1.29633e-220	0.560583	22.1216	10.194
ACKR1+ VEC	PHYHIPL	0.126728	0.103138	8.5008e-221	1.61279e-219	0.52624	6.89603	1.68865
ACKR1+ VEC	IFNAR2	0.422919	0.220567	2.24024e-220	4.24654e-219	0.568502	27.0409	13.6691
ACKR1+ VEC	SENP7	0.75135	0.33186	3.56277e-220	6.74179e-219	0.589802	42.689	27.5388
ACKR1+ VEC	TRIO	1.24714	0.413279	5.81329e-220	1.09909e-218	0.602696	60.4949	42.934
ACKR1+ VEC	MGLL	0.664276	0.333316	6.83038e-219	1.28471e-217	0.581831	35.6873	21.4889
ACKR1+ VEC	TBC1D8	0.479779	0.246477	2.49403e-218	4.67486e-217	0.571474	29.0026	15.3123
ACKR1+ VEC	HS3ST2	0.102129	0.0810509	6.47819e-218	1.21324e-216	0.521926	5.55304	1.17237
ACKR1+ VEC	UHRF2	0.595388	0.301436	9.73947e-218	1.82246e-216	0.580401	34.8272	20.66
ACKR1+ VEC	PCCA	0.951735	0.365384	1.37789e-217	2.57612e-216	0.594575	49.5096	32.7841
ACKR1+ VEC	PIBF1	0.921697	0.363869	3.58275e-217	6.68689e-216	0.59436	48.4382	32.6686
ACKR1+ VEC	AMOTL1	0.356425	0.201333	4.32717e-217	8.06249e-216	0.563027	23.6155	11.4562
ACKR1+ VEC	MFSD6	0.349961	0.194849	1.20193e-216	2.23564e-215	0.561257	22.7554	10.7515
ACKR1+ VEC	EFCAB13	0.438444	0.238437	2.2628e-216	4.1982e-215	0.56782	26.4977	13.6563
ACKR1+ VEC	MAP3K11	0.20869	0.135907	7.75376e-216	1.43734e-214	0.547165	15.3161	6.03534
ACKR1+ VEC	KCNG3	0.031638	0.0287928	1.25496e-215	2.32242e-214	0.509814	2.17293	0.210604
ACKR1+ VEC	CLEC9A	0.0472708	0.0408791	3.34721e-215	6.18384e-214	0.513102	3.01796	0.39692
ACKR1+ VEC	PRSS23	1.08273	0.392937	4.786e-215	8.82702e-214	0.596482	53.5386	35.6642
ACKR1+ VEC	DOCK11	0.994411	0.391594	7.39522e-215	1.36163e-213	0.59557	49.7812	34.6629
ACKR1+ VEC	SSBP3	0.611645	0.307008	1.06752e-214	1.96389e-213	0.580975	35.5214	21.4497
ACKR1+ VEC	KTN1	1.1229	0.386909	2.70069e-213	4.93101e-212	0.602694	57.5524	45.8811
ACKR1+ VEC	CCDC148	0.130337	0.0982608	7.14164e-213	1.30068e-211	0.52911	7.9825	2.18757
ACKR1+ VEC	NDST1	0.262901	0.171521	7.46952e-213	1.35927e-211	0.552444	17.8059	7.74272
ACKR1+ VEC	PRAG1	0.199358	0.126996	1.20123e-212	2.18412e-211	0.540616	12.5698	4.44107
ACKR1+ VEC	VAV2	0.242144	0.156119	3.7444e-212	6.79689e-211	0.548051	15.8292	6.40797
ACKR1+ VEC	IGFBP2	0.178909	0.115083	4.65351e-212	8.44009e-211	0.539539	12.1322	4.20514
ACKR1+ VEC	UNC13B	0.364442	0.210656	9.78098e-212	1.77251e-210	0.561371	22.7856	11.0989
ACKR1+ VEC	DHH	0.0346054	0.0301616	3.83509e-211	6.93843e-210	0.512039	2.74634	0.337937
ACKR1+ VEC	FAF1	1.08985	0.383693	1.00934e-210	1.82458e-209	0.597574	54.9117	38.4624
ACKR1+ VEC	STAG1	1.46889	0.438079	1.03765e-210	1.8742e-209	0.604473	67.2853	50.8755
ACKR1+ VEC	NES	0.101246	0.0743034	1.05888e-210	1.91096e-209	0.527471	7.45435	1.95719
ACKR1+ VEC	CDC37	0.683087	0.324384	1.06976e-210	1.92901e-209	0.586575	39.8974	26.4601
ACKR1+ VEC	PKNOX2	0.181333	0.13107	1.38228e-210	2.4905e-209	0.536618	10.8194	3.60004
ACKR1+ VEC	CCDC69	0.381682	0.218615	2.25295e-210	4.04585e-209	0.565582	25.2452	13.0554
ACKR1+ VEC	RASSF10	0.00980577	0.00931654	3.72704e-210	6.68755e-209	0.504504	0.935567	0.0346958
ACKR1+ VEC	CCDC149	0.297747	0.181749	1.06423e-209	1.90644e-208	0.554928	19.3602	8.7267
ACKR1+ VEC	STARD13	0.834196	0.323455	3.15725e-209	5.6466e-208	0.585696	43.3228	25.8727
ACKR1+ VEC	RAD51B	1.03247	0.400361	1.6249e-208	2.89894e-207	0.591773	47.8044	31.9261
ACKR1+ VEC	RNF180	0.289648	0.179674	1.94004e-208	3.45833e-207	0.552834	18.2888	8.05811
ACKR1+ VEC	SLC25A29	0.28402	0.166544	1.46342e-207	2.60233e-206	0.555034	19.6469	8.86513
ACKR1+ VEC	FAM189A1	0.258691	0.162737	2.63151e-207	4.6719e-206	0.545726	14.954	5.90072
ACKR1+ VEC	TTC19	0.739275	0.31977	5.61603e-207	9.94625e-206	0.587677	42.9304	28.138
ACKR1+ VEC	LRCH2	0.164935	0.108399	6.08353e-207	1.07655e-205	0.538429	11.7399	4.06531
ACKR1+ VEC	ISLR2	0.0391025	0.0341081	1.26082e-206	2.22755e-205	0.512411	2.85197	0.370205
ACKR1+ VEC	RAB11FIP5	0.127069	0.091182	1.52349e-206	2.68944e-205	0.533737	9.79327	3.08897
ACKR1+ VEC	MIR222HG	0.231143	0.150444	4.17818e-206	7.36391e-205	0.546257	15.1652	6.0919
ACKR1+ VEC	SESN3	0.599317	0.325439	2.37978e-205	4.18079e-204	0.57442	31.1755	18.3007
ACKR1+ VEC	SYNPO	0.187169	0.122983	1.52666e-204	2.67988e-203	0.542189	13.3846	5.03228
ACKR1+ VEC	GPR26	0.0185567	0.0174994	1.63727e-204	2.87173e-203	0.505776	1.22227	0.066963
ACKR1+ VEC	LINC02185	0.0503017	0.0427486	3.71376e-203	6.48779e-202	0.515737	3.77245	0.627995
ACKR1+ VEC	ETV1	0.145306	0.10357	1.09453e-202	1.90448e-201	0.533159	9.62728	3.04005
ACKR1+ VEC	LINC02405	0.0409378	0.037168	1.96777e-202	3.42119e-201	0.510766	2.42946	0.278608
ACKR1+ VEC	ITPKC	0.346674	0.236602	2.67829e-202	4.6528e-201	0.553569	18.6359	8.60492
ACKR1+ VEC	MMP15	0.0609382	0.0494433	2.78691e-202	4.83766e-201	0.519201	4.79855	0.962116
ACKR1+ VEC	REV3L	1.32364	0.410724	3.00775e-202	5.21686e-201	0.601082	62.1096	48.0864
ACKR1+ VEC	MTM1	0.354492	0.2013	3.92443e-202	6.80141e-201	0.559616	22.4234	10.9615
ACKR1+ VEC	PHACTR2	0.857816	0.350027	1.77226e-201	3.06664e-200	0.590142	46.22	31.9014
ACKR1+ VEC	MYEF2	0.196707	0.130263	3.87457e-200	6.67263e-199	0.542561	13.6261	5.25468
ACKR1+ VEC	PICALM	1.22006	0.393201	7.55047e-200	1.29929e-198	0.598836	60.9627	44.7569
ACKR1+ VEC	POLB	0.236566	0.151534	1.34847e-199	2.31862e-198	0.547276	15.8594	6.62239
ACKR1+ VEC	LINC01822	0.028095	0.0262213	6.20576e-199	1.06621e-197	0.507257	1.56934	0.118313
ACKR1+ VEC	OVCH1	0.0848218	0.0675944	1.03299e-198	1.77338e-197	0.522409	5.82466	1.35938
ACKR1+ VEC	PALLD	0.766237	0.34647	1.13367e-198	1.9447e-197	0.58372	39.9577	26.1638
ACKR1+ VEC	ESYT2	0.948201	0.381314	1.38795e-198	2.37901e-197	0.592644	49.1625	35.7208
ACKR1+ VEC	SYNE1	1.14331	0.391112	1.44716e-198	2.47856e-197	0.596636	56.3603	41.4976
ACKR1+ VEC	ADAMTS1	0.604585	0.351586	2.04773e-198	3.50441e-197	0.567146	26.7844	14.8332
ACKR1+ VEC	PHF14	0.946809	0.354696	3.90911e-198	6.67945e-197	0.592551	50.5357	35.7065
ACKR1+ VEC	RNF115	0.908102	0.385172	8.77431e-198	1.49691e-196	0.591227	47.0198	34.1855
ACKR1+ VEC	C20orf204	0.0266775	0.0242567	1.30112e-197	2.218e-196	0.508812	1.94658	0.184582
ACKR1+ VEC	SYT7	0.0463141	0.0391405	8.8872e-197	1.5091e-195	0.514911	3.56119	0.580461
ACKR1+ VEC	CCDC60	0.0792703	0.0646236	9.4707e-197	1.60693e-195	0.518062	4.48167	0.871906
ACKR1+ VEC	FLOT1	0.424398	0.226469	1.60726e-196	2.72287e-195	0.568165	28.0368	15.5566
ACKR1+ VEC	PES1	0.180409	0.12288	1.81329e-196	3.06714e-195	0.539801	12.4793	4.643
ACKR1+ VEC	FAM135A	0.508372	0.255191	2.06666e-196	3.49301e-195	0.570566	30.0589	16.9389
ACKR1+ VEC	PIK3CB	0.5407	0.262112	2.23253e-196	3.77044e-195	0.573805	32.4883	18.962
ACKR1+ VEC	SV2B	0.12231	0.0883584	4.15659e-196	7.00907e-195	0.526685	7.33364	1.99154
ACKR1+ VEC	MBNL2	1.09248	0.368858	1.05438e-195	1.77521e-194	0.596755	56.5565	42.9264
ACKR1+ VEC	KIF13A	0.943674	0.343743	2.48091e-194	4.14503e-193	0.589994	49.9623	33.5873
ACKR1+ VEC	MYO9A	1.06764	0.372134	4.20563e-194	7.01591e-193	0.593966	54.2478	39.0224
ACKR1+ VEC	CCDC3	0.400549	0.216455	3.07391e-193	5.10845e-192	0.556226	21.2011	10.101
ACKR1+ VEC	ARFGEF1	0.87028	0.334466	2.20103e-192	3.6412e-191	0.58961	47.8648	33.7257
ACKR1+ VEC	DNASE1L3	0.13694	0.102487	4.32075e-192	7.1263e-191	0.529858	8.49555	2.58311
ACKR1+ VEC	ZNF280D	0.948059	0.35862	1.63746e-191	2.69257e-190	0.590353	48.9814	34.9148
ACKR1+ VEC	RASA2	0.767334	0.323472	2.41285e-191	3.9646e-190	0.58443	42.2967	28.318
ACKR1+ VEC	STYK1	0.0417175	0.0351149	4.55948e-191	7.48049e-190	0.512997	3.04814	0.447576
ACKR1+ VEC	PDS5B	0.715181	0.309199	4.01e-190	6.57405e-189	0.582777	40.9235	26.9885
ACKR1+ VEC	ENAH	0.446915	0.230826	4.74059e-190	7.76596e-189	0.565414	27.0711	14.667
ACKR1+ VEC	VIP	0.0208182	0.0188967	1.31327e-189	2.14495e-188	0.507537	1.64479	0.137049
ACKR1+ VEC	MGAT5B	0.032391	0.0288567	3.12242e-189	5.09598e-188	0.510204	2.30874	0.268546
ACKR1+ VEC	SLC5A4-AS1	0.087332	0.0652725	4.36872e-189	7.11938e-188	0.521233	5.53795	1.28132
ACKR1+ VEC	ARGLU1	1.48772	0.363152	8.62058e-189	1.40274e-187	0.60214	69.8808	61.617
ACKR1+ VEC	GIMAP2	0.128282	0.0870001	9.5678e-189	1.55571e-187	0.532811	9.76309	3.21318
ACKR1+ VEC	C1QTNF9	0.0177983	0.0158896	1.09122e-188	1.773e-187	0.507782	1.70515	0.148151
ACKR1+ VEC	TANC2	0.661566	0.309492	2.19465e-188	3.55787e-187	0.576061	34.9329	21.6648
ACKR1+ VEC	FAM13C	0.352431	0.221712	6.98e-188	1.12822e-186	0.552763	18.998	9.05006
ACKR1+ VEC	PRKN	0.966312	0.361508	1.6292e-187	2.62753e-186	0.584295	45.2694	28.9988
ACKR1+ VEC	TNFRSF10B	0.33981	0.201576	2.68808e-187	4.32888e-186	0.556827	21.4728	10.7425
ACKR1+ VEC	DLL4	0.0683151	0.0504631	3.70259e-187	5.95826e-186	0.520162	5.20598	1.16196
ACKR1+ VEC	ATP10D	0.411339	0.212082	7.54938e-187	1.21307e-185	0.563588	26.1506	13.9925
ACKR1+ VEC	GSK3B	0.826522	0.322076	2.02136e-186	3.24561e-185	0.586164	45.6315	31.3234
ACKR1+ VEC	STAU2	0.608119	0.281934	2.76462e-186	4.43252e-185	0.575728	35.0988	21.7362
ACKR1+ VEC	C9orf40	0.0792118	0.0603101	3.38328e-185	5.40854e-184	0.524058	6.5037	1.7053
ACKR1+ VEC	TDRD3	0.70363	0.297518	9.17209e-185	1.46519e-183	0.580337	39.837	25.8231
ACKR1+ VEC	PDGFB	0.156212	0.100202	9.36284e-185	1.49456e-183	0.535156	10.8496	3.80822
ACKR1+ VEC	GPR160	0.0956358	0.07131	3.93265e-184	6.25927e-183	0.524837	6.7904	1.83506
ACKR1+ VEC	LRBA	1.00881	0.35415	8.46335e-184	1.34313e-182	0.58925	50.7017	35.906
ACKR1+ VEC	HIBCH	0.819174	0.321251	1.48687e-183	2.35622e-182	0.584416	44.4847	30.1288
ACKR1+ VEC	HMBOX1	0.67836	0.295612	7.26805e-183	1.14926e-181	0.579552	39.0524	25.5014
ACKR1+ VEC	IFI27	0.617324	0.300966	7.6697e-183	1.21189e-181	0.568931	30.3757	17.4923
ACKR1+ VEC	SULF1	0.963395	0.354837	1.46589e-182	2.31458e-181	0.581501	43.7906	27.3237
ACKR1+ VEC	RIMBP2	0.108618	0.0798539	2.8047e-181	4.41255e-180	0.52643	7.39399	2.12755
ACKR1+ VEC	MEGF11	0.0937724	0.0718179	8.27555e-181	1.3001e-179	0.522797	6.11136	1.56339
ACKR1+ VEC	EYA3	0.473548	0.235059	1.263e-180	1.98133e-179	0.567565	29.3798	16.9073
ACKR1+ VEC	SYT6	0.0156998	0.0146932	5.89861e-180	9.20714e-179	0.505656	1.20718	0.0759839
ACKR1+ VEC	SPATA12	0.0652597	0.0538721	1.84676e-179	2.87439e-178	0.51659	4.11951	0.807372
ACKR1+ VEC	ACER2	0.240777	0.15173	2.82938e-179	4.39752e-178	0.544444	15.1954	6.52629
ACKR1+ VEC	USP34	1.23887	0.363489	2.95521e-179	4.58983e-178	0.59519	61.6719	48.3077
ACKR1+ VEC	TM4SF1	0.61779	0.281184	3.43446e-179	5.33038e-178	0.567408	30.4361	16.9566
ACKR1+ VEC	SNX25	0.391216	0.201441	7.54781e-179	1.16978e-177	0.560011	24.4605	12.8628
ACKR1+ VEC	DUSP23	0.197077	0.138452	1.91219e-178	2.95935e-177	0.540438	13.1281	5.34732
ACKR1+ VEC	SRSF4	0.885524	0.33072	1.9165e-178	2.96392e-177	0.588495	49.1323	36.7602
ACKR1+ VEC	NPR1	0.243651	0.149125	3.53433e-178	5.46208e-177	0.548462	17.308	7.9502
ACKR1+ VEC	ELF4	0.164957	0.110165	8.62999e-178	1.33182e-176	0.536648	11.589	4.34288
ACKR1+ VEC	ZDHHC17	0.6049	0.278273	1.02646e-177	1.58185e-176	0.575392	35.7024	22.9062
ACKR1+ VEC	TMEM150C	0.176231	0.114352	1.47626e-177	2.27343e-176	0.537661	12.0718	4.61004
ACKR1+ VEC	ZNF608	0.350762	0.19074	1.76762e-177	2.7202e-176	0.555874	21.8047	11
ACKR1+ VEC	PBX1	1.44428	0.434177	2.35309e-177	3.61608e-176	0.592374	62.5622	43.3924
ACKR1+ VEC	SEC24B	0.688143	0.286415	6.53348e-177	1.0012e-175	0.579186	40.1086	26.3879
ACKR1+ VEC	IPO11	0.315546	0.176141	1.52186e-176	2.32723e-175	0.554533	20.9899	10.4712
ACKR1+ VEC	SETX	0.821507	0.313302	1.67675e-176	2.56051e-175	0.585304	46.7029	33.1272
ACKR1+ VEC	BHLHE40-AS1	0.105549	0.0800828	3.31966e-176	5.05871e-175	0.523939	6.54897	1.78233
ACKR1+ VEC	KAT6A	0.829444	0.318295	4.52632e-176	6.89269e-175	0.585343	46.4464	33.3184
ACKR1+ VEC	CAMSAP2	0.636885	0.270521	5.18984e-176	7.8976e-175	0.575996	37.649	23.6934
ACKR1+ VEC	TSPAN14	0.516496	0.24673	5.2962e-176	8.05383e-175	0.571143	32.6241	19.9119
ACKR1+ VEC	TMEM88	0.0972222	0.0731381	4.42001e-175	6.70275e-174	0.525473	7.10729	2.04532
ACKR1+ VEC	KPNA3	0.486123	0.247447	6.10059e-175	9.23845e-174	0.567681	29.742	17.689
ACKR1+ VEC	MIRLET7BHG	0.453392	0.228179	1.84596e-174	2.78963e-173	0.563523	27.0409	15.1839
ACKR1+ VEC	FAM172A	1.19126	0.370828	3.98856e-174	6.01922e-173	0.591571	57.5072	43.6085
ACKR1+ VEC	DIPK1B	0.0188094	0.0160766	4.56355e-173	6.86797e-172	0.509622	2.18802	0.262648
ACKR1+ VEC	MLIP	0.102312	0.0801903	6.25711e-173	9.41023e-172	0.523058	6.26226	1.68171
ACKR1+ VEC	PAN3	1.13495	0.358884	7.32718e-173	1.1012e-171	0.590733	56.3302	42.6752
ACKR1+ VEC	SLC48A1	0.239078	0.147128	1.16952e-172	1.75646e-171	0.545852	16.1913	7.28994
ACKR1+ VEC	KIAA0319L	0.614065	0.2699	4.59252e-172	6.89257e-171	0.574303	36.1702	23.0092
ACKR1+ VEC	EMP2	0.502727	0.235215	1.51837e-171	2.27568e-170	0.568272	31.1302	18.5269
ACKR1+ VEC	HID1-AS1	0.019239	0.0174579	3.20244e-170	4.77023e-169	0.507087	1.55425	0.136702
ACKR1+ VEC	PLXNA4	0.567229	0.262183	3.33454e-170	4.96362e-169	0.566344	29.9985	17.4107
ACKR1+ VEC	CD320	0.205907	0.13086	9.36938e-170	1.39088e-168	0.540979	13.8524	5.81294
ACKR1+ VEC	CHST1	0.0198792	0.0184341	1.43051e-169	2.12215e-168	0.507581	1.67497	0.159601
ACKR1+ VEC	ABR	0.570471	0.249431	1.14598e-168	1.69086e-167	0.570523	33.8766	20.5712
ACKR1+ VEC	IMMP2L	1.63117	0.467544	1.34739e-168	1.98669e-167	0.59158	64.9766	46.5899
ACKR1+ VEC	SLC9A3R2	0.181549	0.118288	1.58188e-168	2.3293e-167	0.535866	11.4833	4.39874
ACKR1+ VEC	KIAA1109	0.953483	0.329692	2.57663e-168	3.78895e-167	0.587091	51.2449	38.5394
ACKR1+ VEC	NUTM1	0.0385328	0.0333741	3.85945e-168	5.67152e-167	0.510674	2.47472	0.340019
ACKR1+ VEC	STEAP3	0.0695411	0.0533877	3.90014e-168	5.72746e-167	0.52095	5.59831	1.41767
ACKR1+ VEC	SDCBP2-AS1	0.336915	0.193287	5.66748e-168	8.31167e-167	0.553433	20.6881	10.5972
ACKR1+ VEC	MLLT10	0.906541	0.313331	1.23063e-167	1.80237e-166	0.584558	49.5096	35.0296
ACKR1+ VEC	SVIL	0.727015	0.296361	3.81885e-167	5.58555e-166	0.57616	39.2183	25.6374
ACKR1+ VEC	OVCH1-AS1	0.119083	0.088219	3.66137e-166	5.34091e-165	0.525058	7.07711	2.09181
ACKR1+ VEC	ITFG1	1.02855	0.348998	1.57049e-165	2.28327e-164	0.586699	51.9843	39.0828
ACKR1+ VEC	TNFAIP8L1	0.0878825	0.0629288	1.57932e-165	2.29458e-164	0.524035	6.73004	1.92388
ACKR1+ VEC	TMEM184B	0.299484	0.172676	1.6178e-165	2.34893e-164	0.55214	20.1147	10.1947
ACKR1+ VEC	ENPP2	0.531253	0.279839	3.53098e-165	5.11992e-164	0.562749	27.1616	15.7759
ACKR1+ VEC	EXD3	0.288842	0.164079	5.73836e-165	8.3151e-164	0.550591	19.2998	9.55662
ACKR1+ VEC	HDAC8	0.81966	0.315442	1.65238e-164	2.39277e-163	0.579057	42.7192	29.2417
ACKR1+ VEC	CASC8	0.0872905	0.0680671	3.82054e-164	5.52146e-163	0.519601	5.1758	1.2657
ACKR1+ VEC	ITPKB	0.417925	0.204944	4.17375e-164	6.02393e-163	0.559973	25.7583	14.2489
ACKR1+ VEC	POF1B	0.0457152	0.0376159	8.47296e-164	1.22209e-162	0.513015	3.13868	0.53501
ACKR1+ VEC	DLEU2	0.977875	0.339335	2.94219e-163	4.23804e-162	0.58027	46.4916	30.9362
ACKR1+ VEC	PHACTR4	0.74961	0.291241	6.05301e-163	8.71323e-162	0.578851	42.8399	29.4384
ACKR1+ VEC	MARK4	0.346764	0.197392	9.10126e-163	1.30925e-161	0.553975	21.3822	11.2529
ACKR1+ VEC	TCN2	0.153801	0.0983993	1.62933e-162	2.34231e-161	0.535747	11.6342	4.54515
ACKR1+ VEC	SPAG9	0.973259	0.323058	1.88979e-162	2.71495e-161	0.58739	53.3273	41.7252
ACKR1+ VEC	RNF32	0.0923229	0.070858	1.91327e-162	2.74689e-161	0.521773	5.93029	1.59636
ACKR1+ VEC	SMAD1-AS1	0.0410798	0.0357667	4.23352e-162	6.07407e-161	0.510903	2.55017	0.371245
ACKR1+ VEC	CYP1B1	0.301494	0.178158	5.07384e-162	7.27153e-161	0.546486	17.0967	8.07407
ACKR1+ VEC	RFC3	0.316204	0.183134	8.58214e-162	1.2273e-160	0.549313	18.6812	9.22736
ACKR1+ VEC	CDC25B	0.196333	0.123221	9.91543e-162	1.41704e-160	0.539534	13.4601	5.6752
ACKR1+ VEC	CCNY	0.919576	0.3233	2.47581e-161	3.529e-160	0.584357	49.7963	37.153
ACKR1+ VEC	FRMD4B	0.91434	0.265337	4.80739e-161	6.83902e-160	0.578611	47.2914	29.599
ACKR1+ VEC	VTI1A	0.978487	0.334725	6.27062e-161	8.90322e-160	0.583232	49.4492	35.6187
ACKR1+ VEC	TBC1D1	0.397134	0.188162	2.26941e-160	3.22009e-159	0.55847	25.2754	13.7885
ACKR1+ VEC	MEF2C-AS2	0.0613332	0.0495445	1.30591e-159	1.85177e-158	0.514898	3.71209	0.733123
ACKR1+ VEC	STK3	1.00426	0.329096	1.3075e-159	1.85281e-158	0.584147	51.9089	37.4958
ACKR1+ VEC	LRRC49	0.211449	0.13111	1.75701e-159	2.48819e-158	0.539109	13.3394	5.63079
ACKR1+ VEC	RBFOX2	0.8924	0.311241	7.01105e-159	9.92225e-158	0.581696	48.061	34.2132
ACKR1+ VEC	LRCOL1	0.0210727	0.0185706	1.16511e-158	1.64783e-157	0.5074	1.64479	0.164111
ACKR1+ VEC	DIXDC1	0.395092	0.209896	3.87157e-158	5.465e-157	0.558279	24.6416	13.9332
ACKR1+ VEC	DENND1A	0.816308	0.302451	4.01643e-158	5.66581e-157	0.577852	43.4435	29.6479
ACKR1+ VEC	EPHA2	0.0962151	0.0661345	5.09816e-158	7.18248e-157	0.525582	7.42417	2.30727
ACKR1+ VEC	ZDHHC2	0.278621	0.158458	8.17094e-158	1.14967e-156	0.5492	18.8924	9.44629
ACKR1+ VEC	USP25	0.817215	0.294991	5.60079e-157	7.87536e-156	0.579261	45.2694	31.6811
ACKR1+ VEC	RABGAP1L	1.19902	0.359798	1.91911e-156	2.68638e-155	0.586718	56.7074	43.5849
ACKR1+ VEC	TRIM24	0.330267	0.180438	2.93763e-156	4.10948e-155	0.552933	21.337	11.2852
ACKR1+ VEC	VOPP1	0.461264	0.211223	6.80709e-155	9.46189e-154	0.5627	28.9271	17.0499
ACKR1+ VEC	CHN2	0.644423	0.256608	1.02263e-154	1.42056e-153	0.566445	33.107	19.7409
ACKR1+ VEC	KDR	0.224521	0.115785	2.7545e-154	3.81904e-153	0.540959	14.788	6.45239
ACKR1+ VEC	MATN2	0.383007	0.19494	5.25731e-154	7.27989e-153	0.556267	23.872	13.2326
ACKR1+ VEC	SSH1	0.420401	0.23852	5.28366e-154	7.31174e-153	0.557046	24.0078	13.6792
ACKR1+ VEC	FABP4	1.25847	0.382606	9.16365e-154	1.2665e-152	0.583029	54.1874	38.1966
ACKR1+ VEC	SLC25A13	0.643671	0.269381	4.6874e-153	6.46204e-152	0.571509	36.804	24.3808
ACKR1+ VEC	IFIH1	0.179172	0.10539	6.51347e-153	8.96814e-152	0.538156	13.1885	5.59193
ACKR1+ VEC	TNFRSF1B	0.556576	0.220791	1.02269e-152	1.40721e-151	0.566773	33.7709	20.3373
ACKR1+ VEC	CAMKK1	0.123201	0.0852899	2.01116e-152	2.76212e-151	0.527781	8.37483	2.85547
ACKR1+ VEC	OPHN1	0.618532	0.253851	3.30712e-152	4.53343e-151	0.569442	35.5666	22.6727
ACKR1+ VEC	SLC8A1	1.00644	0.340287	4.36449e-152	5.97539e-151	0.575777	44.4847	28.9693
ACKR1+ VEC	MALT1	0.485027	0.230572	6.77264e-152	9.26074e-151	0.564057	29.8929	18.4537
ACKR1+ VEC	CACHD1	0.648386	0.261551	6.97275e-152	9.5284e-151	0.569449	35.8835	22.7393
ACKR1+ VEC	VWCE	0.0834744	0.0634718	7.97794e-152	1.08748e-150	0.521949	6.11136	1.74798
ACKR1+ VEC	ARHGAP17	0.535236	0.231929	8.42901e-152	1.14825e-150	0.567046	33.0466	20.745
ACKR1+ VEC	STAT3	1.01881	0.325425	1.21157e-151	1.64842e-150	0.585051	53.5536	43.0225
ACKR1+ VEC	TRIM5	0.408018	0.209735	1.55351e-151	2.11102e-150	0.556404	24.2342	13.5702
ACKR1+ VEC	BTBD7	0.632549	0.268297	1.79926e-151	2.44344e-150	0.571508	36.8643	24.7451
ACKR1+ VEC	PODXL	0.328306	0.14346	2.89017e-151	3.92004e-150	0.551412	21.6237	10.9445
ACKR1+ VEC	PRELID2	0.473511	0.232923	4.92757e-151	6.67514e-150	0.558053	25.5168	14.592
ACKR1+ VEC	TCF4-AS2	0.0619755	0.0493089	3.87288e-150	5.23341e-149	0.515123	3.83281	0.809801
ACKR1+ VEC	DTNB	0.382159	0.184756	5.02573e-150	6.78287e-149	0.554617	23.3892	12.7264
ACKR1+ VEC	VRK2	0.55114	0.247597	5.30444e-150	7.15461e-149	0.566202	32.1714	20.4018
ACKR1+ VEC	TPK1	0.437907	0.212706	3.68946e-149	4.961e-148	0.557208	25.1698	14.3034
ACKR1+ VEC	LPAR6	0.462466	0.213887	5.4638e-149	7.32881e-148	0.560946	28.2179	16.6953
ACKR1+ VEC	SP100	0.948095	0.315548	6.86663e-149	9.20482e-148	0.582614	51.1544	39.8957
ACKR1+ VEC	ZFYVE28	0.28317	0.159862	1.83415e-148	2.45569e-147	0.546081	17.6701	8.74751
ACKR1+ VEC	SRL	0.0789715	0.0568382	1.95543e-148	2.61647e-147	0.520549	5.67376	1.55992
ACKR1+ VEC	GNB1	0.920737	0.303868	2.57032e-148	3.43712e-147	0.582635	51.1996	40.2281
ACKR1+ VEC	MORN5	0.0200928	0.0186713	6.08835e-148	8.12661e-147	0.506004	1.31281	0.112415
ACKR1+ VEC	NACC2	0.214235	0.12651	1.28499e-147	1.71205e-146	0.541812	15.2709	7.1005
ACKR1+ VEC	SBF2	1.35372	0.364235	2.87813e-147	3.8323e-146	0.586221	62.9244	48.4066
ACKR1+ VEC	TBC1D2	0.138319	0.0890822	3.30453e-147	4.39738e-146	0.530528	9.70273	3.61982
ACKR1+ VEC	SVIP	0.265306	0.142492	5.26063e-147	6.99612e-146	0.545981	17.8663	8.80025
ACKR1+ VEC	FAR1	0.599503	0.248605	2.01472e-146	2.67287e-145	0.569892	36.4267	24.361
ACKR1+ VEC	SNTB2	0.60786	0.266154	3.01285e-146	3.99464e-145	0.56982	35.7175	24.3485
ACKR1+ VEC	LINC01290	0.0759484	0.0558091	3.4124e-146	4.51616e-145	0.51999	5.49268	1.49713
ACKR1+ VEC	UVRAG	1.04839	0.318689	3.99421e-146	5.28296e-145	0.581561	53.8404	39.3416
ACKR1+ VEC	LTC4S	0.188768	0.105624	1.11143e-145	1.46471e-144	0.537906	13.4148	5.81676
ACKR1+ VEC	LINC00314	0.028584	0.0254607	2.09987e-145	2.76068e-144	0.508214	1.87113	0.228993
ACKR1+ VEC	STARD3	0.230118	0.134213	2.36915e-145	3.11283e-144	0.543712	16.4328	7.96963
ACKR1+ VEC	VCAN-AS1	0.11857	0.0799636	3.0172e-145	3.95953e-144	0.524253	7.12238	2.26078
ACKR1+ VEC	FARS2	0.756199	0.283324	8.02271e-145	1.0522e-143	0.573219	40.9235	28.2265
ACKR1+ VEC	GABRB1	0.0545843	0.045493	1.28953e-144	1.68418e-143	0.513418	3.33484	0.656445
ACKR1+ VEC	ICAM4	0.059661	0.0490318	1.78057e-144	2.32272e-143	0.516593	4.33077	1.027
ACKR1+ VEC	ZMIZ1	0.657825	0.272161	8.81766e-144	1.14614e-142	0.571464	38.2224	26.6176
ACKR1+ VEC	KIF3C	0.0868509	0.0613247	1.9956e-143	2.58622e-142	0.522597	6.48861	1.97627
ACKR1+ VEC	FAM219A	0.273803	0.155273	2.71244e-143	3.51314e-142	0.546217	18.0323	9.17185
ACKR1+ VEC	KBTBD2	0.374531	0.184964	4.06248e-143	5.25858e-142	0.556826	25.4263	14.8089
ACKR1+ VEC	KCNN2	0.0279332	0.0245178	7.09141e-143	9.16846e-142	0.508193	1.87113	0.232462
ACKR1+ VEC	FLOT2	0.229748	0.128884	1.86346e-142	2.40357e-141	0.543755	16.7044	8.17018
ACKR1+ VEC	NT5C2	0.72041	0.270533	2.82609e-142	3.64305e-141	0.572605	40.7424	28.2795
ACKR1+ VEC	RDX	0.624457	0.270559	3.1014e-142	3.99559e-141	0.569636	36.2004	25.1403
ACKR1+ VEC	FBXW8	0.34211	0.186046	6.19061e-141	7.92405e-140	0.550786	21.0955	11.587
ACKR1+ VEC	ZNF251	0.327447	0.167425	7.60294e-141	9.72045e-140	0.550986	21.4728	11.696
ACKR1+ VEC	MIPOL1	0.483188	0.221794	3.955e-140	5.04471e-139	0.559267	27.8708	16.8368
ACKR1+ VEC	B4GALT5	0.514052	0.235992	1.02187e-139	1.30038e-138	0.563363	31.0246	20.0098
ACKR1+ VEC	SYBU	0.264165	0.146056	1.13637e-139	1.44525e-138	0.543959	17.0062	8.44254
ACKR1+ VEC	NCOA1	1.10473	0.323819	1.20391e-139	1.53025e-138	0.581611	55.3644	43.0676
ACKR1+ VEC	MINK1	0.272024	0.1503	1.64653e-139	2.09165e-138	0.546288	18.3944	9.49001
ACKR1+ VEC	GDAP1	0.191267	0.118357	6.0452e-139	7.6527e-138	0.534366	11.7399	4.96567
ACKR1+ VEC	RAP1GDS1	0.534727	0.233344	6.79683e-139	8.59424e-138	0.563079	31.3113	19.9237
ACKR1+ VEC	UNC5C	0.472964	0.238641	1.47146e-138	1.85736e-137	0.552793	22.8912	12.9343
ACKR1+ VEC	ZSWIM6	0.969002	0.321548	1.4815e-138	1.86895e-137	0.576192	47.4121	34.1865
ACKR1+ VEC	PCED1B	0.743032	0.285096	2.60606e-138	3.28571e-137	0.56807	36.8493	24.523
ACKR1+ VEC	DOCK9-AS1	0.0467442	0.0385794	3.64559e-138	4.59105e-137	0.511892	2.91233	0.535357
ACKR1+ VEC	ATP11A	0.579957	0.232783	5.01655e-138	6.31391e-137	0.565589	34.5103	22.2355
ACKR1+ VEC	HERC4	1.0288	0.312014	6.65952e-138	8.37213e-137	0.579329	52.4974	39.6126
ACKR1+ VEC	CBFA2T3	0.0935889	0.062929	6.85358e-138	8.61114e-137	0.523733	7.03184	2.28611
ACKR1+ VEC	SLC35G2	0.314018	0.162508	1.18228e-137	1.48376e-136	0.54952	20.7183	11.2359
ACKR1+ VEC	SERTAD2	0.385871	0.202012	6.671e-137	8.33856e-136	0.553313	23.2383	13.4339
ACKR1+ VEC	SH3BP2	0.261856	0.143534	9.76471e-137	1.21916e-135	0.544923	17.7758	9.0799
ACKR1+ VEC	VWA1	0.0829269	0.0591719	1.07773e-136	1.34482e-135	0.523701	7.01675	2.30207
ACKR1+ VEC	BRAF	0.930559	0.303209	1.4096e-136	1.75793e-135	0.578012	49.0116	38.0086
ACKR1+ VEC	RASA1	0.959501	0.301415	1.83006e-136	2.28099e-135	0.576907	49.8566	36.1746
ACKR1+ VEC	RNASE1	0.544175	0.209522	2.02014e-136	2.5136e-135	0.559694	29.4703	17.7153
ACKR1+ VEC	PPA2	0.531711	0.232777	2.42674e-136	3.01781e-135	0.563937	32.2921	21.1547
ACKR1+ VEC	SENCR	0.0302052	0.0245848	3.42954e-136	4.26e-135	0.511601	2.83688	0.516274
ACKR1+ VEC	PITPNM2	0.205482	0.120536	3.27236e-135	4.03949e-134	0.537285	13.445	6.10092
ACKR1+ VEC	SLC6A4	0.0429181	0.0353622	4.41903e-135	5.4488e-134	0.512353	3.06323	0.595034
ACKR1+ VEC	SMURF2	0.758184	0.26849	9.7354e-135	1.19838e-133	0.572193	42.4476	30.1961
ACKR1+ VEC	ASB9	0.0426083	0.0342037	2.09461e-134	2.57256e-133	0.513667	3.47065	0.740062
ACKR1+ VEC	TCF7L1	0.643082	0.258301	3.88428e-134	4.75721e-133	0.566411	35.6421	23.929
ACKR1+ VEC	SAMD9L	0.292505	0.152696	8.3275e-134	1.01648e-132	0.54677	19.2395	10.1936
ACKR1+ VEC	NDRG1	0.63435	0.287626	9.28246e-134	1.13114e-132	0.567343	35.1743	24.9994
ACKR1+ VEC	OSBPL10-AS1	0.0480527	0.038957	1.85942e-133	2.26333e-132	0.512523	3.12359	0.620709
ACKR1+ VEC	ZNF354B	0.17174	0.106783	2.97414e-133	3.61818e-132	0.534675	12.102	5.30222
ACKR1+ VEC	DYM	0.822588	0.278999	3.79275e-133	4.61148e-132	0.573729	45.0279	32.8448
ACKR1+ VEC	EPB41	0.630119	0.239457	5.14019e-133	6.23937e-132	0.565989	36.0193	23.7798
ACKR1+ VEC	GPR4	0.0242004	0.0191582	1.13054e-132	1.36926e-131	0.510717	2.59544	0.449658
ACKR1+ VEC	CHST11	0.60616	0.227702	1.38282e-132	1.67201e-131	0.562776	33.1824	20.8997
ACKR1+ VEC	SPATA5	0.546307	0.233252	1.54699e-132	1.86948e-131	0.561398	30.9491	19.7627
ACKR1+ VEC	YLPM1	0.533209	0.225077	1.85759e-132	2.2436e-131	0.563617	32.941	21.6974
ACKR1+ VEC	CDH24	0.0301198	0.0247568	2.19418e-132	2.64867e-131	0.510299	2.47472	0.414268
ACKR1+ VEC	ATRX	1.18033	0.309521	3.70004e-132	4.4615e-131	0.582391	59.8612	50.7222
ACKR1+ VEC	PPM1D	0.378845	0.185854	4.6506e-132	5.60459e-131	0.553264	23.9777	13.996
ACKR1+ VEC	TRPM4	0.124309	0.0823111	6.0826e-132	7.31822e-131	0.52841	9.12932	3.50463
ACKR1+ VEC	ACSL5	0.227522	0.125874	9.66864e-132	1.16135e-130	0.541393	15.9952	7.89608
ACKR1+ VEC	ATXN3	0.702591	0.261955	1.60858e-131	1.93109e-130	0.570522	40.7726	29.216
ACKR1+ VEC	SNAP25	0.0639139	0.0482253	2.578e-131	3.0847e-130	0.516313	4.36095	1.10021
ACKR1+ VEC	GRAPL	0.0590435	0.0470991	3.38269e-131	4.04091e-130	0.514131	3.63664	0.815352
ACKR1+ VEC	GPD2	0.430201	0.197984	3.66159e-131	4.37169e-130	0.556002	26.3769	15.9188
ACKR1+ VEC	FRMD4A	1.10005	0.304968	4.15983e-131	4.96384e-130	0.575897	54.3232	36.9844
ACKR1+ VEC	CEACAM19	0.0948097	0.067506	5.45246e-131	6.49921e-130	0.522429	6.60933	2.14802
ACKR1+ VEC	ZNF33A	0.558674	0.232197	1.66533e-130	1.97963e-129	0.563602	33.3635	22.1214
ACKR1+ VEC	TMEM204	0.170129	0.0997226	3.25027e-130	3.85321e-129	0.534821	12.3887	5.48715
ACKR1+ VEC	VPS13D	0.752488	0.259407	5.90822e-130	6.99283e-129	0.571251	42.9153	30.6798
ACKR1+ VEC	AK9	0.262372	0.145468	8.55322e-130	1.0107e-128	0.54223	16.5837	8.39605
ACKR1+ VEC	LCORL	0.541862	0.231898	2.02177e-129	2.38388e-128	0.560765	30.8133	19.8557
ACKR1+ VEC	N4BP2L2	1.62434	0.294451	2.51573e-129	2.96471e-128	0.585306	73.2911	67.5882
ACKR1+ VEC	NT5DC1	0.477316	0.216867	2.64598e-129	3.11652e-128	0.55786	28.1274	17.5648
ACKR1+ VEC	MAP4K4	0.831142	0.280635	2.8151e-129	3.31392e-128	0.573314	45.6164	33.8531
ACKR1+ VEC	HMCN1	0.444204	0.188627	4.37387e-129	5.14336e-128	0.55186	23.9173	13.4901
ACKR1+ VEC	RAB11A	0.847291	0.29226	7.13242e-129	8.37819e-128	0.573876	46.1295	34.9023
ACKR1+ VEC	SH3BP4	0.233408	0.124487	7.84353e-129	9.20855e-128	0.541415	16.2668	8.10668
ACKR1+ VEC	EEPD1	0.605712	0.234562	1.04314e-128	1.22403e-127	0.56095	32.0205	20.1368
ACKR1+ VEC	PPARG	0.903244	0.246576	1.09989e-128	1.28992e-127	0.569849	45.6315	29.2358
ACKR1+ VEC	HBB	0.551723	0.235189	1.87884e-128	2.20227e-127	0.554047	25.6526	14.9778
ACKR1+ VEC	ZNF407	0.70569	0.263	2.37546e-128	2.78139e-127	0.567157	38.0715	26.271
ACKR1+ VEC	PARP4	0.582273	0.23362	2.61821e-128	3.06398e-127	0.565024	35.2346	24.0362
ACKR1+ VEC	ADIRF	0.884623	0.323124	4.81558e-128	5.62041e-127	0.569787	40.9839	29.4915
ACKR1+ VEC	CDC27	0.653065	0.246504	5.68438e-128	6.63087e-127	0.567875	38.7355	27.2047
ACKR1+ VEC	DYRK1A	0.816407	0.277254	9.20099e-128	1.07101e-126	0.572592	44.8016	33.4367
ACKR1+ VEC	DIS3L2	0.551777	0.223428	1.11582e-127	1.29814e-126	0.562942	33.4088	22.1623
ACKR1+ VEC	PPP4R1	0.423133	0.195675	4.44946e-127	5.16824e-126	0.556112	26.9051	16.6439
ACKR1+ VEC	ARFGEF2	0.514114	0.219064	4.62235e-127	5.3662e-126	0.561061	31.4169	20.6031
ACKR1+ VEC	CLDN11	0.402961	0.194644	8.55295e-127	9.91353e-126	0.550476	22.5743	12.9471
ACKR1+ VEC	CSPP1	0.553375	0.230465	1.31393e-126	1.52133e-125	0.561991	32.5034	21.534
ACKR1+ VEC	SOGA1	0.303485	0.154974	2.59068e-126	2.99327e-125	0.547387	20.3108	11.2352
ACKR1+ VEC	RBM44	0.0539736	0.0417038	3.80749e-126	4.39683e-125	0.514796	3.89316	0.937482
ACKR1+ VEC	NBDY	0.391888	0.188662	4.73639e-126	5.46663e-125	0.55408	25.2603	15.3699
ACKR1+ VEC	SOX17	0.0865547	0.0586997	6.74527e-126	7.78112e-125	0.518737	5.29651	1.53876
ACKR1+ VEC	SKAP2	0.878635	0.290357	1.60073e-125	1.84071e-124	0.573643	47.1556	36.1198
ACKR1+ VEC	TEAD4	0.116087	0.073143	5.62025e-125	6.45605e-124	0.525976	8.2692	3.07648
ACKR1+ VEC	CNN3	0.453889	0.217632	9.55972e-125	1.09698e-123	0.557015	27.4936	17.7382
ACKR1+ VEC	HOXB3	0.331195	0.162836	1.05034e-124	1.20463e-123	0.549478	22.016	12.6053
ACKR1+ VEC	EXOC1	0.597713	0.240107	1.34404e-124	1.53987e-123	0.565017	35.974	25.0435
ACKR1+ VEC	GON4L	0.547679	0.226025	1.54932e-124	1.77227e-123	0.563035	33.8615	23.0273
ACKR1+ VEC	FBXL17	0.972038	0.297716	3.20569e-124	3.65931e-123	0.572934	48.227	35.5553
ACKR1+ VEC	ACTN4	0.65636	0.252049	3.44442e-124	3.92978e-123	0.567831	39.0825	28.4027
ACKR1+ VEC	HUS1	0.275937	0.15166	4.01467e-124	4.57798e-123	0.544851	18.5755	10.1201
ACKR1+ VEC	DENND3	0.267195	0.136242	7.24308e-124	8.25076e-123	0.54364	18.0474	9.5306
ACKR1+ VEC	RTTN	0.344319	0.170879	9.69202e-124	1.10232e-122	0.548851	21.5784	12.3517
ACKR1+ VEC	MTMR2	0.361201	0.176344	1.3152e-123	1.4935e-122	0.550901	23.1175	13.6199
ACKR1+ VEC	HLA-DPA1	0.54611	0.186771	1.56757e-122	1.77455e-121	0.556888	29.41	18.0096
ACKR1+ VEC	HERC6	0.171217	0.10129	3.15673e-122	3.56614e-121	0.531612	11.0608	4.78178
ACKR1+ VEC	ANGEL1	0.1489	0.0960031	4.89119e-122	5.51699e-121	0.529978	10.1705	4.27869
ACKR1+ VEC	TRAPPC9	0.657135	0.241035	1.10658e-121	1.24559e-120	0.564404	36.8191	25.2072
ACKR1+ VEC	PCDH11X	0.0957178	0.0709598	1.70925e-121	1.92198e-120	0.518113	5.10035	1.49088
ACKR1+ VEC	AK7	0.0637399	0.0476174	2.47452e-121	2.77963e-120	0.516035	4.36095	1.15745
ACKR1+ VEC	ZDHHC21	0.539852	0.219592	2.9167e-121	3.27466e-120	0.560749	32.3978	21.6353
ACKR1+ VEC	MKLN1	1.11435	0.297098	3.57017e-121	4.0042e-120	0.57681	56.813	45.116
ACKR1+ VEC	MAML3	0.929125	0.291741	1.04097e-120	1.16513e-119	0.56893	44.4545	31.0684
ACKR1+ VEC	RPRML	0.00496978	0.00476356	2.16387e-120	2.41824e-119	0.502475	0.513053	0.0180418
ACKR1+ VEC	ODF2L	0.664492	0.243836	2.51539e-120	2.80965e-119	0.566995	39.5654	28.707
ACKR1+ VEC	FUT1	0.0190689	0.0161995	2.78994e-120	3.11473e-119	0.507781	1.81077	0.25432
ACKR1+ VEC	GNAZ	0.0401525	0.0297911	3.05405e-120	3.40784e-119	0.513396	3.48574	0.802515
ACKR1+ VEC	MOB2	0.247823	0.132257	4.18801e-120	4.66599e-119	0.543185	17.9418	9.64891
ACKR1+ VEC	PLXDC2	1.47772	0.358759	4.55821e-120	5.07587e-119	0.578276	64.4937	49.9998
ACKR1+ VEC	MAP2K5	0.670777	0.244062	6.7206e-120	7.47239e-119	0.564886	37.7245	26.2953
ACKR1+ VEC	PROS1	0.420118	0.189198	1.72988e-119	1.9185e-118	0.553632	26.0751	16.0905
ACKR1+ VEC	SYN2	0.140247	0.0927045	2.59041e-119	2.86996e-118	0.525785	8.29938	3.18716
ACKR1+ VEC	SLC35E4	0.133681	0.0853195	3.70472e-119	4.0962e-118	0.527906	9.29531	3.77178
ACKR1+ VEC	LINC02091	0.0111381	0.010266	7.57615e-119	8.36403e-118	0.504132	0.890297	0.0638403
ACKR1+ VEC	EHD4-AS1	0.0433171	0.036239	7.89984e-119	8.71697e-118	0.511141	2.77652	0.552358
ACKR1+ VEC	DPYSL3	0.453456	0.194567	1.3314e-118	1.46838e-117	0.553391	26.3015	16.0569
ACKR1+ VEC	HOXB4	0.133355	0.0839422	1.49348e-118	1.64547e-117	0.529027	9.86872	4.12325
ACKR1+ VEC	TRNT1	0.304436	0.1525	2.00956e-118	2.21295e-117	0.546629	20.5674	11.681
ACKR1+ VEC	THADA	0.714162	0.24618	4.5736e-118	5.02889e-117	0.566243	40.2445	28.5491
ACKR1+ VEC	LIMS1	0.826147	0.270613	4.67829e-118	5.14141e-117	0.570623	45.4203	34.8617
ACKR1+ VEC	JPX	1.0612	0.302232	1.47534e-117	1.61489e-116	0.574243	52.9651	41.9108
ACKR1+ VEC	TMOD1	0.269796	0.145743	1.64375e-117	1.79833e-116	0.54076	16.5535	8.6927
ACKR1+ VEC	BTN3A1	0.271855	0.136083	3.75751e-117	4.10264e-116	0.542756	18.0474	9.70651
ACKR1+ VEC	AGPAT4	0.355659	0.166442	7.09196e-117	7.72019e-116	0.548564	22.3178	13.0401
ACKR1+ VEC	NPAS2	0.170399	0.103602	1.84301e-116	2.00328e-115	0.530717	10.8043	4.74396
ACKR1+ VEC	PDE8A	0.705524	0.24431	2.36946e-116	2.57294e-115	0.565428	39.671	28.1418
ACKR1+ VEC	IFI16	0.981407	0.287295	2.78081e-116	3.01812e-115	0.573573	51.2298	41.379
ACKR1+ VEC	UBN1	0.386131	0.182669	2.82779e-116	3.06758e-115	0.552304	25.215	15.6662
ACKR1+ VEC	ICAM5	0.0185481	0.0160955	5.01237e-116	5.42394e-115	0.507577	1.7655	0.250504
ACKR1+ VEC	LINC02400	0.0124165	0.0116705	5.56724e-116	6.02139e-115	0.503542	0.754489	0.0461455
ACKR1+ VEC	GPBP1L1	0.633277	0.236121	1.01611e-115	1.09791e-114	0.564483	37.8452	27.2161
ACKR1+ VEC	PPARD	0.259958	0.139754	1.02701e-115	1.10914e-114	0.541173	16.976	9.04867
ACKR1+ VEC	LFNG	0.162438	0.0959159	2.31604e-115	2.49508e-114	0.532206	11.6644	5.30499
ACKR1+ VEC	ZNF347	0.16719	0.0984	3.04528e-115	3.27585e-114	0.532778	11.9662	5.51664
ACKR1+ VEC	LRP6	0.416194	0.184018	3.70592e-115	3.98455e-114	0.553122	26.3166	16.4618
ACKR1+ VEC	FAM222B	0.447671	0.198646	4.43148e-115	4.75997e-114	0.553359	26.4977	16.6575
ACKR1+ VEC	SAP30L-AS1	0.241834	0.129206	4.7956e-115	5.14855e-114	0.538576	15.4368	7.87977
ACKR1+ VEC	DOCK4-AS1	0.0906966	0.0633885	5.26419e-115	5.64885e-114	0.5195	5.73412	1.84617
ACKR1+ VEC	MAP2	0.227877	0.113161	5.93463e-115	6.36516e-114	0.536025	14.0335	6.78408
ACKR1+ VEC	CFLAR-AS1	0.384799	0.191794	1.2887e-114	1.37812e-113	0.548337	22.1216	13.2104
ACKR1+ VEC	MID2	0.134323	0.0862578	1.33531e-114	1.42727e-113	0.527814	9.38585	3.90953
ACKR1+ VEC	BCAS3	1.02433	0.300282	1.89794e-114	2.02766e-113	0.570769	49.1474	36.9865
ACKR1+ VEC	CLASP1	0.819573	0.258033	2.47013e-114	2.63638e-113	0.568566	45.0279	33.3653
ACKR1+ VEC	PITPNB	0.598214	0.232662	2.84493e-114	3.03344e-113	0.562854	36.2004	25.7759
ACKR1+ VEC	PLEC	0.32401	0.159393	3.54909e-114	3.78056e-113	0.547768	21.85	12.9055
ACKR1+ VEC	PIGC	0.326386	0.183084	3.57042e-114	3.80143e-113	0.545257	19.6167	11.3952
ACKR1+ VEC	CPEB2	0.352528	0.169798	4.06642e-114	4.32741e-113	0.548779	22.6799	13.5647
ACKR1+ VEC	ID3	0.426677	0.19434	1.01706e-113	1.08075e-112	0.54937	23.3741	14.0126
ACKR1+ VEC	ARHGAP28	0.468328	0.193228	1.32498e-113	1.40659e-112	0.552734	26.5882	16.4385
ACKR1+ VEC	YEATS2	0.358266	0.162827	1.57321e-113	1.66849e-112	0.549219	23.3288	13.9377
ACKR1+ VEC	ACAP2	0.872457	0.269585	4.08556e-113	4.3225e-112	0.570614	48.0006	37.51
ACKR1+ VEC	ARHGAP27	0.156995	0.0918768	5.75283e-113	6.08351e-112	0.531083	11.1815	5.03124
ACKR1+ VEC	CAMK2D	1.07267	0.302244	5.96479e-113	6.30155e-112	0.572724	52.3766	41.8682
ACKR1+ VEC	PFKP	0.147461	0.0848115	9.35887e-113	9.8634e-112	0.530775	11.0457	4.93514
ACKR1+ VEC	LINC00582	0.0300957	0.0258246	9.60837e-113	1.01215e-111	0.508366	1.99185	0.319896
ACKR1+ VEC	NASP	0.610018	0.240399	1.02258e-112	1.07666e-111	0.562835	36.2457	26.2755
ACKR1+ VEC	FBXL2	0.489913	0.208628	1.37879e-112	1.45032e-111	0.553646	27.3125	17.3507
ACKR1+ VEC	CD40	0.169553	0.0996429	1.57109e-112	1.651e-111	0.534503	13.0527	6.32991
ACKR1+ VEC	C13orf42	0.0187293	0.0167152	1.9812e-112	2.07898e-111	0.505649	1.26754	0.137742
ACKR1+ VEC	GJC2	0.0466487	0.0363369	2.3948e-112	2.51057e-111	0.513731	3.65173	0.910766
ACKR1+ VEC	BEND7	0.226096	0.125235	2.56471e-112	2.68741e-111	0.538163	15.286	7.90926
ACKR1+ VEC	PLD2	0.120766	0.0772952	2.76522e-112	2.89612e-111	0.526374	8.79734	3.57159
ACKR1+ VEC	ANGPT2	0.380948	0.184052	1.76292e-111	1.83756e-110	0.546044	20.9597	12.1866
ACKR1+ VEC	GPIHBP1	0.0741031	0.0450504	2.29893e-111	2.3917e-110	0.51821	5.32669	1.65638
ACKR1+ VEC	DCHS1	0.105519	0.0675973	6.54606e-111	6.77792e-110	0.52499	8.19375	3.23053
ACKR1+ VEC	HIVEP1	0.52273	0.226958	6.64103e-111	6.87299e-110	0.556845	30.255	20.4986
ACKR1+ VEC	KIAA2026	0.725828	0.25169	9.90776e-111	1.02344e-109	0.565672	41.0744	30.7065
ACKR1+ VEC	FGD6	0.27091	0.13576	1.12213e-110	1.15858e-109	0.541288	17.6249	9.5816
ACKR1+ VEC	TPT1-AS1	0.487021	0.196489	1.22749e-110	1.26676e-109	0.555704	29.7872	19.5053
ACKR1+ VEC	PARP9	0.271525	0.132914	2.59168e-110	2.66955e-109	0.542315	18.4246	10.1655
ACKR1+ VEC	UBR1	0.678833	0.241564	3.27568e-110	3.37092e-109	0.563719	38.826	28.2556
ACKR1+ VEC	ZNF208	0.269489	0.138328	3.41146e-110	3.509e-109	0.540563	17.0967	9.25616
ACKR1+ VEC	DPYSL2	0.740607	0.248877	8.23292e-110	8.45238e-109	0.56598	42.1609	31.5562
ACKR1+ VEC	RNF152	0.142751	0.0789069	8.87206e-110	9.10429e-109	0.527526	9.53674	4.00598
ACKR1+ VEC	F2RL3	0.0441818	0.0341992	1.82007e-109	1.86333e-108	0.511438	2.92742	0.639444
ACKR1+ VEC	EHBP1L1	0.260929	0.129709	3.58917e-109	3.67104e-108	0.542	18.2586	10.118
ACKR1+ VEC	SIK2	0.934502	0.255393	3.9223e-109	4.00802e-108	0.56704	46.899	33.4516
ACKR1+ VEC	PRMT8	0.0271606	0.0235385	4.11191e-109	4.19784e-108	0.507456	1.75041	0.259872
ACKR1+ VEC	RFX3-AS1	0.38231	0.173833	4.38873e-109	4.47626e-108	0.546788	21.9556	12.9811
ACKR1+ VEC	KCNH4	0.0301042	0.0251638	4.76717e-109	4.85997e-108	0.508531	2.05221	0.346264
ACKR1+ VEC	HLA-DPB1	0.519187	0.150959	4.88471e-109	4.97748e-108	0.554172	29.742	18.4929
ACKR1+ VEC	MAP3K14	0.26775	0.1291	1.64514e-108	1.67248e-107	0.54078	17.5645	9.53164
ACKR1+ VEC	ROPN1L	0.0246092	0.0204473	2.46968e-108	2.50839e-107	0.508256	1.97676	0.325447
ACKR1+ VEC	GRAMD1A	0.288071	0.14704	3.55592e-108	3.60998e-107	0.543836	19.5413	11.2779
ACKR1+ VEC	AP3B1	0.776841	0.24601	6.72513e-108	6.81785e-107	0.566322	43.866	32.9801
ACKR1+ VEC	TTC17	1.03792	0.276951	1.52161e-107	1.53973e-106	0.571344	53.6291	42.8147
ACKR1+ VEC	RAB6A	0.649607	0.233772	1.89051e-107	1.91214e-106	0.563111	38.66	28.5429
ACKR1+ VEC	PCGF2	0.114891	0.0721696	2.05504e-107	2.07759e-106	0.526941	9.25004	3.92167
ACKR1+ VEC	RORA	1.85286	0.371524	2.23343e-107	2.25689e-106	0.576457	70.2279	60.1733
ACKR1+ VEC	SPATS2	0.409962	0.177971	3.15932e-107	3.18661e-106	0.550952	25.7583	16.2536
ACKR1+ VEC	KIF9	0.123161	0.0763521	7.14923e-107	7.201e-106	0.526331	8.97842	3.75652
ACKR1+ VEC	PPFIA3	0.0423392	0.0313854	9.54939e-107	9.60525e-106	0.513253	3.5461	0.894459
ACKR1+ VEC	CACNG8	0.0219579	0.0185443	1.80101e-106	1.81071e-105	0.507261	1.70515	0.252586
ACKR1+ VEC	KDM4C	0.729234	0.233701	1.96277e-106	1.97243e-105	0.563976	41.4516	30.1299
ACKR1+ VEC	JMJD1C	1.61384	0.304933	2.14029e-106	2.14885e-105	0.57669	70.9823	63.6169
ACKR1+ VEC	FARP1	0.443931	0.185739	3.88427e-106	3.88908e-105	0.551753	26.7693	17.105
ACKR1+ VEC	CDH13	0.371445	0.169632	4.62879e-106	4.63239e-105	0.540915	18.0021	9.85778
ACKR1+ VEC	ADARB2-AS1	0.00880126	0.00836659	8.28864e-106	8.28982e-105	0.50286	0.603591	0.0315732
ACKR1+ VEC	GNG12	0.532545	0.217152	1.20581e-105	1.20509e-104	0.557679	32.3978	22.7397
ACKR1+ VEC	HACE1	0.29474	0.14376	3.39616e-105	3.38639e-104	0.543291	19.5564	11.3233
ACKR1+ VEC	LAP3	0.331442	0.158778	5.3995e-105	5.37661e-104	0.546815	22.2574	13.6181
ACKR1+ VEC	RABGAP1	0.71915	0.229292	6.67885e-105	6.64144e-104	0.563858	41.7534	30.6458
ACKR1+ VEC	PLA2G4C	0.1598	0.0892105	7.15705e-105	7.11373e-104	0.529686	10.8646	4.94867
ACKR1+ VEC	TSHZ3	0.270344	0.134266	7.28129e-105	7.23392e-104	0.539647	17.0364	9.30924
ACKR1+ VEC	CTNNB1	0.8542	0.258045	2.97139e-104	2.94536e-103	0.568429	47.8497	38.9079
ACKR1+ VEC	LINC02284	0.0440291	0.0334563	4.9255e-104	4.88014e-103	0.511924	3.12359	0.73798
ACKR1+ VEC	ZNF83	0.587748	0.215831	5.20944e-104	5.15911e-103	0.559649	35.6421	25.4629
ACKR1+ VEC	XIST	1.5011	0.320137	7.50353e-104	7.41759e-103	0.573755	58.2617	53.9545
ACKR1+ VEC	AHCYL2	0.502802	0.202983	8.09597e-104	7.99963e-103	0.552906	28.3084	18.5904
ACKR1+ VEC	BTNL9	0.286898	0.123965	1.02835e-103	1.01566e-102	0.534485	13.9581	6.92009
ACKR1+ VEC	TPST1	0.578653	0.230463	1.27414e-103	1.25784e-102	0.556039	31.432	21.6165
ACKR1+ VEC	TRIM54	0.0165313	0.0147024	1.30092e-103	1.28369e-102	0.5053	1.19209	0.132191
ACKR1+ VEC	MX1	0.199715	0.111063	1.71817e-103	1.69466e-102	0.53353	13.0979	6.53149
ACKR1+ VEC	TCAP	0.0202253	0.0173407	7.38045e-103	7.25977e-102	0.507062	1.65988	0.247728
ACKR1+ VEC	KIAA1549L	0.0373224	0.0304226	2.49769e-102	2.44693e-101	0.510155	2.56526	0.537092
ACKR1+ VEC	RYBP	0.456894	0.196186	4.74439e-102	4.63549e-101	0.553401	28.7309	19.4744
ACKR1+ VEC	ZNF638	1.15403	0.273371	4.87349e-102	4.7595e-101	0.571351	58.6238	47.8823
ACKR1+ VEC	CRHBP	0.0654261	0.0437777	5.4714e-102	5.33865e-101	0.516129	4.64765	1.41559
ACKR1+ VEC	RELL1	0.379627	0.181331	1.00552e-101	9.78064e-101	0.547528	23.2986	14.6722
ACKR1+ VEC	NCOA3	0.700709	0.232549	1.25192e-101	1.21611e-100	0.562359	40.3501	29.964
ACKR1+ VEC	ZZZ3	0.637555	0.220886	1.47495e-101	1.43149e-100	0.559873	37.1209	26.6252
ACKR1+ VEC	ZNF75D	0.319624	0.151811	1.85996e-101	1.80195e-100	0.543404	20.1147	11.8889
ACKR1+ VEC	KDM6A	0.746208	0.242947	1.86624e-101	1.80723e-100	0.563119	41.2555	31.1794
ACKR1+ VEC	PLSCR2	0.0361913	0.0291085	2.82935e-101	2.73625e-100	0.509886	2.48981	0.513498
ACKR1+ VEC	ETS1	0.680156	0.190684	4.58774e-101	4.43482e-100	0.558591	38.4186	25.1639
ACKR1+ VEC	GLIS3	0.589762	0.203152	6.29507e-101	6.08254e-100	0.553968	31.1151	20.2669
ACKR1+ VEC	KCTD1	0.196865	0.111694	9.50693e-101	9.1819e-100	0.531859	12.2529	6.02459
ACKR1+ VEC	CCDC171	0.346469	0.163278	1.04876e-100	1.01246e-99	0.543943	20.6428	12.3427
ACKR1+ VEC	FAM43A	0.139608	0.0809744	1.43736e-100	1.38638e-99	0.528353	10.3214	4.69886
ACKR1+ VEC	RASGRP3	0.174977	0.0939381	1.47811e-100	1.42505e-99	0.529548	11.0306	5.13221
ACKR1+ VEC	NOL4L	0.141858	0.0737788	2.27857e-100	2.19581e-99	0.528922	10.7288	4.91154
ACKR1+ VEC	CYP4F12	0.107746	0.0704184	2.48363e-100	2.39237e-99	0.523058	7.60525	3.04248
ACKR1+ VEC	A4GALT	0.188875	0.104436	2.62397e-100	2.52533e-99	0.534203	13.7015	7.06477
ACKR1+ VEC	BTBD3	0.191358	0.103307	2.91535e-100	2.80452e-99	0.533789	13.5054	6.88192
ACKR1+ VEC	AIF1L	0.12043	0.070262	3.42021e-100	3.28584e-99	0.5259	9.05387	3.89253
ACKR1+ VEC	SCRG1	0.117986	0.0791166	3.90789e-100	3.75271e-99	0.522452	7.31855	2.88322
ACKR1+ VEC	ZNF30	0.112776	0.0743524	4.98936e-100	4.78912e-99	0.523076	7.62034	3.0574
ACKR1+ VEC	IGF2BP2	0.365679	0.169657	6.87658e-100	6.59192e-99	0.545115	21.7142	13.2542
ACKR1+ VEC	ERBIN	0.724531	0.229006	8.78749e-100	8.41633e-99	0.561804	40.8933	29.989
ACKR1+ VEC	BZW2	0.253319	0.137084	1.58986e-99	1.51938e-98	0.539372	17.142	9.74016
ACKR1+ VEC	TACSTD2	0.0225761	0.0186328	1.89336e-99	1.80784e-98	0.507456	1.78059	0.289016
ACKR1+ VEC	NAV3	1.18845	0.309831	2.06084e-99	1.96689e-98	0.565621	50.2339	36.4726
ACKR1+ VEC	DICER1	0.644859	0.222851	2.65488e-99	2.53165e-98	0.560832	38.5242	28.8406
ACKR1+ VEC	SIK3	0.985658	0.274904	5.59731e-99	5.33051e-98	0.56712	49.6605	39.9089
ACKR1+ VEC	ZNF793	0.111697	0.067151	5.61141e-99	5.3416e-98	0.524162	8.22393	3.40644
ACKR1+ VEC	ASL	0.128963	0.0792855	6.75773e-99	6.4272e-98	0.527449	9.86872	4.46813
ACKR1+ VEC	ZCCHC7	0.978768	0.272338	7.27986e-99	6.92078e-98	0.566432	48.9965	38.52
ACKR1+ VEC	SETD5	0.887338	0.247441	8.05501e-99	7.65436e-98	0.566627	49.1172	38.9627
ACKR1+ VEC	GABRB3	0.075031	0.0567646	8.06896e-99	7.66428e-98	0.515593	4.46658	1.36598
ACKR1+ VEC	PEAK1	0.929821	0.255446	1.31383e-98	1.24254e-97	0.565135	47.8648	36.1111
ACKR1+ VEC	RNF38	0.580557	0.209635	1.7442e-98	1.64883e-97	0.557311	34.616	24.6219
ACKR1+ VEC	DCUN1D2	0.21756	0.114673	1.80807e-98	1.70847e-97	0.53579	14.9087	7.96894
ACKR1+ VEC	SLFN5	0.461844	0.187083	2.07675e-98	1.96151e-97	0.552492	28.8517	19.5414
ACKR1+ VEC	ZBTB20-AS5	0.457891	0.196345	5.84009e-98	5.49936e-97	0.547217	24.038	15.1198
ACKR1+ VEC	TDRD10	0.220326	0.107436	8.63918e-98	8.12812e-97	0.535005	14.6069	7.64523
ACKR1+ VEC	PHACTR1	0.570817	0.196793	9.28139e-98	8.72482e-97	0.553815	31.6735	20.9927
ACKR1+ VEC	NSRP1	0.728664	0.230972	1.03383e-97	9.71416e-97	0.562835	42.523	32.6418
ACKR1+ VEC	SH3BP5	0.737708	0.245311	1.37923e-97	1.29374e-96	0.562984	41.9043	32.9777
ACKR1+ VEC	CYP1B1-AS1	0.222353	0.10315	1.52427e-97	1.42918e-96	0.533543	13.7619	6.9808
ACKR1+ VEC	AASS	0.294076	0.133788	3.68833e-97	3.45526e-96	0.542749	20.2958	12.0804
ACKR1+ VEC	POLK	0.619051	0.218684	7.37065e-97	6.88421e-96	0.559132	37.1209	27.5554
ACKR1+ VEC	ROCK2	0.85575	0.237176	1.25175e-96	1.16664e-95	0.564806	47.5781	36.7887
ACKR1+ VEC	ARHGEF3-AS1	0.0305204	0.0258039	1.49902e-96	1.39591e-95	0.508004	1.94658	0.347305
ACKR1+ VEC	JAG1	0.336269	0.142003	1.6228e-96	1.51053e-95	0.544956	22.3781	13.6948
ACKR1+ VEC	ATXN7L1	0.563217	0.207176	4.02674e-96	3.74019e-95	0.554942	32.4279	22.7105
ACKR1+ VEC	CCDC85A	0.120672	0.080303	5.77074e-96	5.35325e-95	0.520054	6.36789	2.38291
ACKR1+ VEC	CAV1	0.919408	0.265629	1.72408e-95	1.59394e-94	0.563834	45.9937	35.6864
ACKR1+ VEC	STARD8	0.11244	0.068188	2.37978e-95	2.19642e-94	0.524427	8.48046	3.63127
ACKR1+ VEC	USP6NL	0.289796	0.135567	3.0719e-95	2.83282e-94	0.541342	19.3451	11.4531
ACKR1+ VEC	PON2	0.338479	0.148758	4.4398e-95	4.08735e-94	0.546227	23.5099	14.9112
ACKR1+ VEC	VPS13B	1.14824	0.273125	5.21611e-95	4.80001e-94	0.567682	57.2657	44.6081
ACKR1+ VEC	QRICH2	0.0650732	0.0468532	8.3023e-95	7.63036e-94	0.515918	4.66274	1.49157
ACKR1+ VEC	WNT2B	0.296013	0.141182	2.51347e-94	2.30229e-93	0.539583	18.1077	10.4875
ACKR1+ VEC	FBN1	1.16424	0.239055	3.27037e-94	2.99434e-93	0.566168	55.1984	41.4737
ACKR1+ VEC	CDR2	0.531139	0.19885	4.00199e-94	3.66114e-93	0.552752	30.5417	20.984
ACKR1+ VEC	MGC32805	0.0912928	0.0610539	2.04235e-93	1.85906e-92	0.517466	5.32669	1.83853
ACKR1+ VEC	CHIC2	0.515711	0.202598	2.24319e-93	2.03932e-92	0.554557	32.1563	23.207
ACKR1+ VEC	CFAP54	0.105299	0.0659972	3.46003e-93	3.14427e-92	0.520606	6.71495	2.60358
ACKR1+ VEC	USP31	0.251785	0.122852	4.10926e-93	3.72959e-92	0.537544	16.7195	9.44872
ACKR1+ VEC	EPN2	0.563756	0.201875	5.85831e-93	5.31042e-92	0.555476	34.0426	24.4227
ACKR1+ VEC	CNST	0.45451	0.177658	8.34751e-93	7.56054e-92	0.551038	28.8668	19.6347
ACKR1+ VEC	ZNF43	0.314546	0.146936	8.60228e-93	7.78483e-92	0.542395	20.4768	12.521
ACKR1+ VEC	LINC01558	0.0347328	0.0261744	1.0089e-92	9.12274e-92	0.50971	2.48981	0.545419
ACKR1+ VEC	FAM124B	0.0316463	0.0244863	1.15082e-92	1.03973e-91	0.509715	2.48981	0.546459
ACKR1+ VEC	CSRP2	0.122893	0.0745277	2.7246e-92	2.45653e-91	0.524782	8.78225	3.87969
ACKR1+ VEC	TSHZ1	0.283451	0.139552	2.85254e-92	2.57082e-91	0.540101	18.651	11.0881
ACKR1+ VEC	KLHL13	0.193624	0.108678	3.23577e-92	2.91379e-91	0.528446	10.8194	5.2075
ACKR1+ VEC	ANXA4	0.681643	0.232838	4.14836e-92	3.73096e-91	0.559335	39.0825	30.0358
ACKR1+ VEC	FGR	0.160464	0.0859822	1.31463e-91	1.17895e-90	0.528859	11.1363	5.40978
ACKR1+ VEC	VPS13C	0.964708	0.243015	2.26914e-91	2.03079e-90	0.566089	52.7992	43.9964
ACKR1+ VEC	SMAD2	0.613738	0.207566	2.4315e-91	2.1752e-90	0.55728	36.9247	27.4083
ACKR1+ VEC	CBX2	0.0136801	0.0119614	2.97535e-91	2.65737e-90	0.505504	1.26754	0.166887
ACKR1+ VEC	JARID2	0.632582	0.218834	5.4366e-91	4.84963e-90	0.556173	35.4459	26.0729
ACKR1+ VEC	PPP6R3	0.883667	0.237795	8.50292e-91	7.57562e-90	0.563728	48.5891	38.7952
ACKR1+ VEC	DDX10	0.44555	0.177634	9.95458e-91	8.8509e-90	0.549008	27.1767	18.2469
ACKR1+ VEC	ZNF792	0.0260951	0.0206462	1.21022e-90	1.0756e-89	0.508956	2.26347	0.47221
ACKR1+ VEC	RANBP17	0.194992	0.110867	1.48352e-90	1.31689e-89	0.528839	11.1212	5.47292
ACKR1+ VEC	ZNF721	0.644558	0.210831	2.08521e-90	1.84875e-89	0.557796	38.2073	28.5623
ACKR1+ VEC	ST6GALNAC2	0.066217	0.0489432	2.49254e-90	2.2081e-89	0.515282	4.48167	1.44439
ACKR1+ VEC	FEZ2	0.676378	0.225832	4.89662e-90	4.3203e-89	0.558049	38.66	29.1157
ACKR1+ VEC	SULT1C2	0.0554667	0.0418486	1.1517e-89	1.01451e-88	0.513918	3.96861	1.19874
ACKR1+ VEC	NUTM2A-AS1	0.489276	0.184395	1.18303e-89	1.04169e-88	0.55156	30.255	21.1027
ACKR1+ VEC	SCAMP1	0.3514	0.155321	1.81752e-89	1.59844e-88	0.545112	23.359	15.1607
ACKR1+ VEC	FAM168A	0.438383	0.180259	2.31835e-89	2.03726e-88	0.547581	25.9695	17.2855
ACKR1+ VEC	PCDH12	0.0734679	0.0488915	3.78188e-89	3.31933e-88	0.516635	5.07017	1.74763
ACKR1+ VEC	MSN	0.656894	0.232262	4.93033e-89	4.32558e-88	0.557246	37.2567	28.4364
ACKR1+ VEC	TNRC6C	0.588161	0.202363	5.36343e-89	4.70178e-88	0.555441	35.4459	25.9379
ACKR1+ VEC	CPNE5	0.116649	0.0636607	5.77327e-89	5.05903e-88	0.523257	8.20884	3.52995
ACKR1+ VEC	CTTNBP2	0.360634	0.159364	5.78152e-89	5.06422e-88	0.542897	21.5935	13.5387
ACKR1+ VEC	TRIM44	0.587607	0.205176	6.82659e-89	5.97484e-88	0.556057	35.974	26.8171
ACKR1+ VEC	ARHGAP26-AS1	0.0813393	0.0572974	7.73556e-89	6.76227e-88	0.516438	4.97963	1.71155
ACKR1+ VEC	LINC01725	0.156113	0.0919867	9.54366e-89	8.33286e-88	0.524433	8.76716	3.93
ACKR1+ VEC	LINC01182	0.0311611	0.0254629	1.02286e-88	8.92378e-88	0.508086	2.00694	0.390328
ACKR1+ VEC	LINC02231	0.0171127	0.0153673	1.6811e-88	1.46314e-87	0.504734	1.07137	0.124905
ACKR1+ VEC	KDM7A	0.424107	0.168244	2.28384e-88	1.98694e-87	0.547454	26.211	17.4135
ACKR1+ VEC	ASCC3	0.63965	0.212475	2.74002e-88	2.38287e-87	0.556188	36.8342	27.2574
ACKR1+ VEC	SIRT5	0.19178	0.102306	2.89919e-88	2.52028e-87	0.532242	13.445	7.17094
ACKR1+ VEC	GATAD2B	0.603934	0.199595	1.05834e-87	9.1565e-87	0.555482	36.2004	26.5461
ACKR1+ VEC	DSP	0.0843027	0.0491013	2.40763e-87	2.07726e-86	0.519115	6.23208	2.38673
ACKR1+ VEC	DDX58	0.379124	0.158701	2.46588e-87	2.12667e-86	0.544299	23.3288	14.9445
ACKR1+ VEC	DUSP18	0.13955	0.0800828	4.67701e-87	4.02094e-86	0.526165	9.80836	4.64196
ACKR1+ VEC	SVIL-AS1	0.445426	0.167897	5.54636e-87	4.76646e-86	0.547545	26.8749	17.8475
ACKR1+ VEC	PDS5A	0.803688	0.229123	7.25975e-87	6.23647e-86	0.560994	45.3901	36.0511
ACKR1+ VEC	LARP4B	0.597212	0.197655	2.67964e-86	2.29292e-85	0.555056	36.1249	26.5895
ACKR1+ VEC	SUPT3H	0.496993	0.192726	2.96302e-86	2.53242e-85	0.54823	27.4483	18.709
ACKR1+ VEC	EGOT	0.0612417	0.0454616	4.8333e-86	4.12123e-85	0.513889	4.01388	1.24836
ACKR1+ VEC	SPTAN1	0.767328	0.225935	5.15404e-86	4.38616e-85	0.560069	44.0773	34.8429
ACKR1+ VEC	NALF1	0.00708977	0.00589799	6.48464e-86	5.51421e-85	0.504062	0.905387	0.0926379
ACKR1+ VEC	BCL2L1	0.304877	0.138383	2.45808e-85	2.08131e-84	0.540505	20.0996	12.4464
ACKR1+ VEC	PKD1L1	0.0210941	0.0176915	3.2997e-85	2.79177e-84	0.506488	1.55425	0.256749
ACKR1+ VEC	ARNTL2-AS1	0.0396185	0.0318454	3.58921e-85	3.03437e-84	0.509704	2.53508	0.598503
ACKR1+ VEC	AGRN	0.0746897	0.045136	3.64806e-85	3.08292e-84	0.518648	6.06609	2.32983
ACKR1+ VEC	PIM3	0.361111	0.155036	5.38291e-85	4.5455e-84	0.544409	23.691	15.5524
ACKR1+ VEC	SLC26A8	0.0562282	0.0427528	1.41871e-84	1.19431e-83	0.512426	3.48574	1.0093
ACKR1+ VEC	LHFPL6	1.01591	0.249539	1.5649e-84	1.31636e-83	0.560892	49.1022	37.5461
ACKR1+ VEC	HERC5	0.137514	0.0755163	1.62237e-84	1.36418e-83	0.525427	9.56692	4.51185
ACKR1+ VEC	ICAM2	0.173148	0.0799028	1.7285e-84	1.45286e-83	0.530049	12.5094	6.4569
ACKR1+ VEC	LINC02367	0.0119099	0.0104268	2.31636e-84	1.94398e-83	0.504234	0.950656	0.103741
ACKR1+ VEC	SYNJ2	0.205964	0.097029	3.51194e-84	2.94283e-83	0.532659	14.2598	7.77881
ACKR1+ VEC	PTBP3	0.540689	0.190162	3.52413e-84	2.95191e-83	0.55258	33.3032	24.2406
ACKR1+ VEC	INHBB	0.136081	0.0847491	4.47441e-84	3.74216e-83	0.524648	9.06896	4.24955
ACKR1+ VEC	WDSUB1	0.292915	0.138912	4.62705e-84	3.86833e-83	0.539053	18.9679	11.6477
ACKR1+ VEC	SLC30A10	0.049765	0.0358165	5.36261e-84	4.47985e-83	0.51218	3.41029	0.9753
ACKR1+ VEC	GIT1	0.165148	0.0859267	6.37077e-84	5.32002e-83	0.530181	12.5094	6.57104
ACKR1+ VEC	LINC00630	0.214045	0.110963	8.09992e-84	6.75881e-83	0.53293	14.29	7.96512
ACKR1+ VEC	ADD1	0.666641	0.206745	8.37293e-84	6.98395e-83	0.55768	40.6821	31.941
ACKR1+ VEC	SLC30A3	0.0123711	0.0110704	9.59804e-84	8.00276e-83	0.504052	0.905387	0.0950666
ACKR1+ VEC	SRPK2	0.873969	0.239413	1.22577e-83	1.02164e-82	0.560502	46.5218	37.4732
ACKR1+ VEC	SPATA1	0.242575	0.125102	2.35867e-83	1.96364e-82	0.532642	14.1693	7.86138
ACKR1+ VEC	DNASE1L1	0.0999727	0.0606344	3.05784e-83	2.54377e-82	0.522024	7.75615	3.38597
ACKR1+ VEC	ABHD18	0.340397	0.145498	3.2308e-83	2.68663e-82	0.541306	21.2464	13.428
ACKR1+ VEC	NCAM1	0.151268	0.0876371	4.37964e-83	3.6392e-82	0.523199	8.38992	3.78566
ACKR1+ VEC	NSUN6	0.392957	0.160379	5.47674e-83	4.54736e-82	0.545133	24.9585	16.6661
ACKR1+ VEC	GNAL	0.209366	0.109608	5.92232e-83	4.91546e-82	0.531392	13.3545	7.2549
ACKR1+ VEC	TAF1	0.456704	0.171065	1.15355e-82	9.53806e-82	0.548529	28.8064	20.092
ACKR1+ VEC	IL18R1	0.170138	0.0849319	1.46401e-82	1.20959e-81	0.528021	11.2721	5.69879
ACKR1+ VEC	ORC2	0.414354	0.160241	1.81877e-82	1.50157e-81	0.545856	25.9846	17.4673
ACKR1+ VEC	ATP9B	0.691102	0.204994	2.49768e-82	2.06051e-81	0.556099	39.7314	30.142
ACKR1+ VEC	TMEM245	0.506189	0.179142	3.00619e-82	2.47908e-81	0.551001	31.9903	23.0484
ACKR1+ VEC	CBR4	0.633566	0.204321	3.58076e-82	2.95068e-81	0.553791	36.0193	26.7321
ACKR1+ VEC	FER	1.0377	0.248285	3.6318e-82	2.99161e-81	0.561438	51.9994	40.8717
ACKR1+ VEC	DKK3	0.0676516	0.0423676	4.17071e-82	3.43165e-81	0.515923	4.93436	1.74451
ACKR1+ VEC	LINC00987	0.0501933	0.0337746	7.35775e-82	6.04481e-81	0.513095	3.78754	1.16578
ACKR1+ VEC	TRIP12	0.777706	0.217972	1.12753e-81	9.25638e-81	0.558942	44.5601	35.736
ACKR1+ VEC	WRN	0.520603	0.188519	1.25159e-81	1.02671e-80	0.550019	30.8284	22.1141
ACKR1+ VEC	ALCAM	0.33526	0.146879	2.02032e-81	1.65483e-80	0.538001	18.651	11.357
ACKR1+ VEC	UPF3A	0.575402	0.202971	2.13195e-81	1.74561e-80	0.553247	34.7518	26.3518
ACKR1+ VEC	GDF3	0.00494392	0.00455922	2.71029e-81	2.21748e-80	0.502281	0.482873	0.0267158
ACKR1+ VEC	CHODL-AS1	0.0194078	0.0169145	2.72626e-81	2.22971e-80	0.505137	1.19209	0.164805
ACKR1+ VEC	HIVEP2	0.558294	0.219399	3.47886e-81	2.84417e-80	0.549894	30.3456	22.1425
ACKR1+ VEC	R3HDM1	0.532853	0.192914	3.59427e-81	2.93633e-80	0.549632	30.4814	21.8317
ACKR1+ VEC	KAT2B	0.461244	0.175929	3.65593e-81	2.98559e-80	0.547387	27.7652	19.3696
ACKR1+ VEC	MIER2	0.106767	0.0631976	4.00861e-81	3.26993e-80	0.52269	8.20884	3.70829
ACKR1+ VEC	BRWD1	0.741625	0.215266	4.57496e-81	3.73052e-80	0.557589	42.4476	33.5325
ACKR1+ VEC	C2CD4C	0.0166374	0.0137995	7.44471e-81	6.06152e-80	0.505847	1.38826	0.218584
ACKR1+ VEC	OXR1	0.757098	0.221428	1.35582e-80	1.10145e-79	0.557157	42.0552	33.0488
ACKR1+ VEC	UGGT2	0.707463	0.21776	1.66381e-80	1.35065e-79	0.555264	38.8411	29.8363
ACKR1+ VEC	ANKRD50	0.183535	0.0971681	2.10812e-80	1.70944e-79	0.530113	12.7056	6.86284
ACKR1+ VEC	RALGDS	0.295276	0.14267	3.02076e-80	2.44766e-79	0.538749	19.2093	12.0912
ACKR1+ VEC	UBAP2	0.480235	0.179274	3.66664e-80	2.9688e-79	0.548529	29.3798	20.9348
ACKR1+ VEC	ASAP3	0.256138	0.117775	3.8148e-80	3.08647e-79	0.536162	17.3231	10.3331
ACKR1+ VEC	PRKD3	0.476453	0.17998	4.24124e-80	3.43022e-79	0.548843	29.6816	21.315
ACKR1+ VEC	UBP1	0.342901	0.146412	4.5233e-80	3.65699e-79	0.54231	22.6799	14.9033
ACKR1+ VEC	TNS2	0.380725	0.149096	6.35117e-80	5.12719e-79	0.544756	25.3659	17.1196
ACKR1+ VEC	ERICH1	0.606226	0.199967	6.81081e-80	5.49622e-79	0.553834	36.5776	27.9433
ACKR1+ VEC	RFX7	0.497231	0.178562	9.33931e-80	7.51723e-79	0.547865	29.0478	20.3293
ACKR1+ VEC	STRN	0.43627	0.165932	3.05141e-79	2.44796e-78	0.546808	27.735	19.3686
ACKR1+ VEC	SMAD6	0.25847	0.12268	3.2832e-79	2.63295e-78	0.535047	16.478	9.76202
ACKR1+ VEC	RBM6	1.10846	0.241631	3.44143e-79	2.75883e-78	0.562658	56.8281	47.8327
ACKR1+ VEC	MEGF6	0.150405	0.0765414	5.00982e-79	4.00584e-78	0.526597	10.6534	5.34871
ACKR1+ VEC	MTMR8	0.131083	0.0731438	9.21743e-79	7.36214e-78	0.52357	8.82752	4.15101
ACKR1+ VEC	DENND4A	0.758382	0.213595	9.57848e-79	7.64772e-78	0.556531	42.2816	33.1363
ACKR1+ VEC	SYCP2	0.067764	0.0458889	9.73484e-79	7.76973e-78	0.514853	4.54203	1.58005
ACKR1+ VEC	ENDOU	0.02452	0.0198011	1.011e-78	8.06621e-78	0.507567	1.90131	0.388246
ACKR1+ VEC	CHST15	0.223699	0.101157	1.9023e-78	1.51498e-77	0.532013	14.4258	8.06505
ACKR1+ VEC	ICE2	0.346174	0.14272	2.01593e-78	1.60488e-77	0.54201	22.8459	15.0306
ACKR1+ VEC	CPNE2	0.14911	0.080614	3.14529e-78	2.49849e-77	0.527505	11.2117	5.81572
ACKR1+ VEC	STAB1	0.236738	0.0783018	3.58518e-78	2.84689e-77	0.533582	16.0404	8.99524
ACKR1+ VEC	SEMA5B	0.0401838	0.028855	7.89649e-78	6.25447e-77	0.510292	2.8067	0.747001
ACKR1+ VEC	GIGYF2	0.675864	0.199395	9.34711e-78	7.40076e-77	0.554947	40.1388	30.9411
ACKR1+ VEC	CCDC7	0.439586	0.167319	1.50809e-77	1.19233e-76	0.544342	25.547	17.385
ACKR1+ VEC	POLA1	0.343351	0.146152	1.70594e-77	1.34827e-76	0.540239	21.2615	13.7663
ACKR1+ VEC	PVR	0.0798379	0.050922	1.75802e-77	1.38892e-76	0.518439	6.18681	2.52273
ACKR1+ VEC	EMP1	1.08811	0.28724	1.80388e-77	1.42464e-76	0.559704	49.6605	41.1618
ACKR1+ VEC	DIP2B	0.594105	0.17218	1.91233e-77	1.50975e-76	0.550922	34.797	24.9439
ACKR1+ VEC	UPP1	0.263072	0.125942	2.92522e-77	2.3069e-76	0.535182	16.8704	10.1364
ACKR1+ VEC	MFSD4A	0.0494115	0.0340132	3.47835e-77	2.74212e-76	0.512323	3.56119	1.09569
ACKR1+ VEC	TNRC6B	1.26831	0.23885	3.82608e-77	3.01516e-76	0.563813	61.8832	56.0577
ACKR1+ VEC	SOS1	0.937199	0.219276	4.56574e-77	3.59546e-76	0.558521	49.9019	38.5734
ACKR1+ VEC	PTPRN2	0.123116	0.067463	5.15438e-77	4.05754e-76	0.523767	9.05387	4.33004
ACKR1+ VEC	MRTFB	0.0745075	0.0556355	8.01965e-77	6.29946e-76	0.515841	4.97963	1.85623
ACKR1+ VEC	PRNCR1	0.0451964	0.0326577	9.07723e-77	7.12507e-76	0.511722	3.33484	0.993689
ACKR1+ VEC	CDC42EP5	0.110734	0.0625154	9.74405e-77	7.64574e-76	0.523967	9.1595	4.42615
ACKR1+ VEC	PTBP2	0.746591	0.21145	1.7468e-76	1.36917e-75	0.555288	41.4215	32.382
ACKR1+ VEC	WWC3	0.223552	0.0987881	2.24218e-76	1.75619e-75	0.53404	16.1913	9.53476
ACKR1+ VEC	SSH2	1.01881	0.253532	2.49916e-76	1.95606e-75	0.559474	49.419	41.7707
ACKR1+ VEC	CLOCK	0.466926	0.172808	4.57154e-76	3.57041e-75	0.546658	28.565	20.2731
ACKR1+ VEC	CPEB3	0.432884	0.154195	4.85344e-76	3.78922e-75	0.544606	26.5731	18.0856
ACKR1+ VEC	BPTF	1.07908	0.234334	5.17992e-76	4.04267e-75	0.561733	55.8171	49.2282
ACKR1+ VEC	EXOC2	0.369131	0.14661	5.70125e-76	4.44636e-75	0.542177	23.5702	15.7856
ACKR1+ VEC	NFATC2	0.356342	0.125029	5.92915e-76	4.62245e-75	0.53942	21.4426	13.4249
ACKR1+ VEC	RSU1	0.508788	0.19004	7.3109e-76	5.69358e-75	0.548414	30.4512	22.4201
ACKR1+ VEC	LINC00311	0.0298873	0.0244552	8.55904e-76	6.65611e-75	0.508609	2.24838	0.530499
ACKR1+ VEC	LXN	0.26841	0.116234	1.10239e-75	8.56383e-75	0.535464	17.4891	10.5694
ACKR1+ VEC	CDC14A	0.416983	0.151341	1.25983e-75	9.77641e-75	0.543372	25.2452	16.9892
ACKR1+ VEC	SLC30A7	0.383181	0.152586	1.81131e-75	1.4036e-74	0.543533	25.049	17.2001
ACKR1+ VEC	RASSF3	0.476483	0.167205	2.03086e-75	1.57262e-74	0.546151	28.3839	19.93
ACKR1+ VEC	DOK5	0.139295	0.0846003	2.22922e-75	1.72561e-74	0.522964	8.61627	4.1236
ACKR1+ VEC	PTS	0.350418	0.147546	6.26384e-75	4.83163e-74	0.541489	22.9063	15.4376
ACKR1+ VEC	ALPK1	0.442986	0.160051	7.18591e-75	5.53896e-74	0.545153	27.3427	19.0324
ACKR1+ VEC	MFNG	0.0897054	0.0492337	7.68259e-75	5.91554e-74	0.520418	7.33364	3.24233
ACKR1+ VEC	OLFML2A	0.139925	0.0721445	8.51908e-75	6.5527e-74	0.525258	10.1102	5.09023
ACKR1+ VEC	ZSCAN4	0.00748581	0.00677845	9.34858e-75	7.18061e-74	0.502907	0.633771	0.0523907
ACKR1+ VEC	ARL4A	0.299431	0.124218	1.01834e-74	7.81086e-74	0.538067	19.9487	12.6289
ACKR1+ VEC	GAB3	0.220993	0.104268	1.49489e-74	1.145e-73	0.531505	14.4107	8.25345
ACKR1+ VEC	MGMT	0.62748	0.214508	1.88458e-74	1.44247e-73	0.552216	35.974	28.4312
ACKR1+ VEC	PPCDC	0.310316	0.136961	2.95443e-74	2.25817e-73	0.537272	19.1188	12.1193
ACKR1+ VEC	ARHGEF37	0.135529	0.0747902	3.0872e-74	2.358e-73	0.524677	9.748	4.88517
ACKR1+ VEC	BCKDHB	0.444221	0.165935	6.66716e-74	5.0817e-73	0.544217	26.3769	18.3642
ACKR1+ VEC	TMC1	0.0912553	0.0635582	6.92376e-74	5.2736e-73	0.516811	5.50777	2.19104
ACKR1+ VEC	SLC7A14	0.075915	0.050229	9.74494e-74	7.40948e-73	0.514614	4.55711	1.64042
ACKR1+ VEC	RALGAPA1	0.869332	0.225466	1.43909e-73	1.09116e-72	0.557418	46.4464	39.3374
ACKR1+ VEC	DDX17	1.4889	0.218577	1.49209e-73	1.13056e-72	0.563719	70.1977	65.4048
ACKR1+ VEC	FTO	0.814771	0.212372	1.50148e-73	1.13728e-72	0.555161	44.0923	34.2562
ACKR1+ VEC	CHD1	0.703704	0.204197	1.52702e-73	1.15623e-72	0.554428	41.1348	32.8552
ACKR1+ VEC	SNX14	0.455828	0.166368	1.66855e-73	1.26208e-72	0.546411	28.9875	20.9334
ACKR1+ VEC	TDRD7	0.189334	0.0949916	1.6943e-73	1.28111e-72	0.529312	12.8716	7.15949
ACKR1+ VEC	EXOC5	0.314566	0.135422	1.77678e-73	1.34254e-72	0.539647	21.4577	14.1861
ACKR1+ VEC	MTF2	0.414365	0.156109	1.78547e-73	1.34864e-72	0.544438	26.6486	18.7392
ACKR1+ VEC	JADE3	0.127645	0.0742388	1.8593e-73	1.40393e-72	0.52317	8.87279	4.3231
ACKR1+ VEC	RGL2	0.170174	0.0845692	3.5498e-73	2.67576e-72	0.528714	12.5094	6.8781
ACKR1+ VEC	PRPF3	0.338519	0.140481	3.90016e-73	2.93785e-72	0.540422	22.3631	14.94
ACKR1+ VEC	LINC01495	0.00617474	0.00591627	4.09428e-73	3.083e-72	0.501731	0.362155	0.0159601
ACKR1+ VEC	NRG2	0.173025	0.0961862	4.12661e-73	3.10627e-72	0.525458	10.2761	5.31159
ACKR1+ VEC	SCLT1	0.563961	0.190752	5.58212e-73	4.20044e-72	0.547931	31.3113	23.0124
ACKR1+ VEC	BBS9	0.64148	0.192623	6.83786e-73	5.14182e-72	0.550331	35.3554	26.3563
ACKR1+ VEC	RGS6	0.280724	0.112519	7.29857e-73	5.48447e-72	0.530212	13.8373	7.71982
ACKR1+ VEC	CRBN	0.478218	0.172956	7.51355e-73	5.64408e-72	0.547906	30.9793	23.045
ACKR1+ VEC	LINC01004	0.514343	0.171248	9.65859e-73	7.24295e-72	0.547078	30.5417	22.0305
ACKR1+ VEC	SLC12A7	0.149653	0.0763981	1.06952e-72	8.01752e-72	0.526582	11.1061	5.8629
ACKR1+ VEC	LOXL2	0.225675	0.11846	1.07775e-72	8.07649e-72	0.531198	14.2598	8.3159
ACKR1+ VEC	MCPH1	0.562436	0.187726	1.54345e-72	1.15545e-71	0.548494	32.3374	23.9505
ACKR1+ VEC	ATAD2B	0.59647	0.184006	2.8869e-72	2.15526e-71	0.550295	35.295	26.6429
ACKR1+ VEC	USP45	0.362632	0.147116	3.78012e-72	2.82017e-71	0.54037	22.6196	15.1444
ACKR1+ VEC	CEMIP	0.223591	0.113736	4.03225e-72	3.00622e-71	0.5291	12.8414	7.19973
ACKR1+ VEC	FAAH2	0.17324	0.0904167	4.7408e-72	3.53086e-71	0.525596	10.5025	5.46008
ACKR1+ VEC	NSMCE2	0.826369	0.221167	5.02514e-72	3.74135e-71	0.554529	43.0512	34.1921
ACKR1+ VEC	MOV10	0.136037	0.071549	7.03266e-72	5.22354e-71	0.524618	9.91399	5.0361
ACKR1+ VEC	LURAP1	0.0593001	0.038984	7.58361e-72	5.63085e-71	0.514474	4.54203	1.65395
ACKR1+ VEC	RHOU	0.327497	0.143096	7.7491e-72	5.75177e-71	0.538465	20.6126	13.5758
ACKR1+ VEC	LIFR-AS1	0.0999014	0.0694885	8.14055e-72	6.03822e-71	0.516817	5.58322	2.26147
ACKR1+ VEC	UBE3C	0.600155	0.183445	1.02009e-71	7.56137e-71	0.550714	36.1702	27.5933
ACKR1+ VEC	SCFD2	0.578037	0.190449	1.28263e-71	9.49449e-71	0.547692	31.6735	23.3021
ACKR1+ VEC	ADAMTSL4-AS1	0.243036	0.109313	1.30691e-71	9.67098e-71	0.531832	15.0747	8.84258
ACKR1+ VEC	SERPINB9P1	0.0580282	0.0373109	1.48033e-71	1.09431e-70	0.514132	4.40622	1.58074
ACKR1+ VEC	MLLT6	0.326035	0.127792	2.49519e-71	1.8408e-70	0.540182	22.7403	15.186
ACKR1+ VEC	ZDHHC23	0.0439513	0.0307517	2.51717e-71	1.85638e-70	0.511622	3.38011	1.05753
ACKR1+ VEC	BCL2L14	0.321783	0.136297	2.92244e-71	2.15381e-70	0.535922	18.6057	11.6863
ACKR1+ VEC	UBE3D	0.324474	0.139389	3.11956e-71	2.29831e-70	0.536526	19.0433	12.1533
ACKR1+ VEC	POMGNT1	0.135458	0.0771284	3.51519e-71	2.58891e-70	0.524251	9.67255	4.93167
ACKR1+ VEC	TMCO3	0.277189	0.121849	4.79745e-71	3.52972e-70	0.536833	19.3149	12.4308
ACKR1+ VEC	NOL10	0.384771	0.150518	6.04934e-71	4.4433e-70	0.5418	24.4153	16.832
ACKR1+ VEC	MYCBP2	1.16586	0.226489	7.14801e-71	5.24852e-70	0.560084	59.0011	51.3096
ACKR1+ VEC	SLC9B2	0.180758	0.0929166	7.18896e-71	5.27682e-70	0.5279	12.1322	6.69942
ACKR1+ VEC	RALGAPB	0.369729	0.143217	1.20545e-70	8.83332e-70	0.541557	24.2644	16.6811
ACKR1+ VEC	APPBP2	0.575844	0.17998	1.68664e-70	1.23346e-69	0.549487	34.8574	26.3858
ACKR1+ VEC	FANCC	0.368109	0.148531	2.85995e-70	2.08803e-69	0.53883	21.5029	14.2565
ACKR1+ VEC	ZDHHC13	0.162246	0.0811929	3.17189e-70	2.31345e-69	0.526625	11.3626	6.11549
ACKR1+ VEC	RAB3GAP1	0.610701	0.192307	4.62878e-70	3.37041e-69	0.550373	35.9891	28.0318
ACKR1+ VEC	C21orf91-OT1	0.0259981	0.0205461	5.19877e-70	3.78293e-69	0.507399	1.90131	0.422248
ACKR1+ VEC	SLCO4A1-AS1	0.00683712	0.00637049	6.83826e-70	4.97094e-69	0.502383	0.513053	0.0364306
ACKR1+ VEC	HLA-E	1.27426	0.272504	1.21102e-69	8.78282e-69	0.558685	57.5977	47.9014
ACKR1+ VEC	FAM193A	0.467856	0.167011	1.69526e-69	1.22784e-68	0.545209	28.9724	21.0756
ACKR1+ VEC	CDK13	0.891725	0.211296	1.71204e-69	1.23958e-68	0.556281	48.7249	40.6701
ACKR1+ VEC	UBE2Q2	0.346028	0.139906	2.37097e-69	1.7144e-68	0.540002	22.8761	15.5614
ACKR1+ VEC	TTC21B	0.383515	0.149705	3.36435e-69	2.42947e-68	0.541281	24.2493	16.8483
ACKR1+ VEC	JAM3	0.201933	0.104238	3.47788e-69	2.51063e-68	0.5288	12.9169	7.37807
ACKR1+ VEC	USP24	0.578904	0.174523	3.81523e-69	2.75234e-68	0.54888	34.9027	26.2026
ACKR1+ VEC	SMARCC1	0.550783	0.17461	4.48961e-69	3.23563e-68	0.548413	33.8917	25.5518
ACKR1+ VEC	GLS	1.02882	0.233743	5.41623e-69	3.90087e-68	0.557532	52.1956	44.9773
ACKR1+ VEC	ALOX12B	0.0143955	0.0125266	5.6539e-69	4.0707e-68	0.504355	1.01102	0.140171
ACKR1+ VEC	ZSWIM5	0.222874	0.105101	1.10752e-68	7.95296e-68	0.529035	13.2639	7.57029
ACKR1+ VEC	AGPAT3	0.351146	0.137752	1.38096e-68	9.90994e-68	0.540047	23.2081	15.8196
ACKR1+ VEC	MINDY3	0.34532	0.139301	1.69253e-68	1.21299e-67	0.538956	22.0009	14.8273
ACKR1+ VEC	INTS3	0.270801	0.11793	4.90069e-68	3.49726e-67	0.535519	18.7264	12.0349
ACKR1+ VEC	C20orf203	0.0282684	0.0215226	6.21513e-68	4.4295e-67	0.508088	2.14275	0.525642
ACKR1+ VEC	IFT88	0.409933	0.151896	7.21621e-68	5.13626e-67	0.541558	25.1245	17.5544
ACKR1+ VEC	LDLRAD2	0.0690183	0.0466306	8.95252e-68	6.36381e-67	0.514734	4.75328	1.82882
ACKR1+ VEC	CASD1	0.362171	0.142779	1.07235e-67	7.61279e-67	0.54003	23.3137	16.0666
ACKR1+ VEC	BRWD3	0.342406	0.13346	1.11123e-67	7.88623e-67	0.538596	21.9707	14.7152
ACKR1+ VEC	CPNE8-AS1	0.00819914	0.00688605	1.25607e-67	8.90543e-67	0.504564	1.07137	0.15856
ACKR1+ VEC	RAPH1	0.632869	0.176802	1.43707e-67	1.01689e-66	0.548797	36.1551	26.9587
ACKR1+ VEC	RIC8B	0.300216	0.126555	1.6314e-67	1.15365e-66	0.536258	19.5413	12.7407
ACKR1+ VEC	REV1	0.52363	0.172712	2.23446e-67	1.57858e-66	0.547091	32.3525	24.53
ACKR1+ VEC	NEMF	0.712323	0.197165	2.39008e-67	1.68743e-66	0.552474	41.6478	33.782
ACKR1+ VEC	DTNBP1	0.314868	0.12683	2.52872e-67	1.78473e-66	0.537083	20.4768	13.4727
ACKR1+ VEC	DIAPH1	0.442149	0.15205	2.57966e-67	1.8201e-66	0.54347	27.7803	19.8668
ACKR1+ VEC	STK33	0.217769	0.0990493	3.18519e-67	2.24588e-66	0.528032	12.7358	7.18169
ACKR1+ VEC	NDNF	0.0585263	0.040834	4.0017e-67	2.81887e-66	0.513077	4.04406	1.443
ACKR1+ VEC	ARIH1	0.820577	0.205502	4.21704e-67	2.96961e-66	0.554525	46.0993	38.7105
ACKR1+ VEC	MYO19	0.252662	0.112634	6.17251e-67	4.34383e-66	0.533305	16.9156	10.5888
ACKR1+ VEC	PACS1	0.688746	0.203578	6.93244e-67	4.87235e-66	0.550002	37.3925	29.4203
ACKR1+ VEC	VWA2	0.0229054	0.0177424	7.37491e-67	5.18166e-66	0.506468	1.6297	0.335509
ACKR1+ VEC	HIF1A	0.493022	0.181308	8.24273e-67	5.78581e-66	0.545103	29.5609	22.1019
ACKR1+ VEC	EEFSEC	0.300557	0.128201	8.66657e-67	6.08136e-66	0.536046	19.4507	12.7327
ACKR1+ VEC	CCDC188	0.00322124	0.00309733	1.08996e-66	7.64095e-66	0.501381	0.286706	0.0104088
ACKR1+ VEC	CLASP2	0.734156	0.195481	1.10281e-66	7.72855e-66	0.551388	40.7273	32.1124
ACKR1+ VEC	LINC01535	0.0493581	0.0334821	1.11067e-66	7.7811e-66	0.511907	3.57628	1.19666
ACKR1+ VEC	NFATC3	0.573036	0.173733	1.47229e-66	1.03079e-65	0.547605	33.9973	25.7134
ACKR1+ VEC	DCBLD1	0.168654	0.0812594	2.12321e-66	1.48414e-65	0.526261	11.4984	6.32054
ACKR1+ VEC	KIAA1522	0.126748	0.0649378	2.18801e-66	1.52894e-65	0.523111	9.40094	4.80607
ACKR1+ VEC	SNAI1	0.040143	0.0267624	2.25677e-66	1.57599e-65	0.511813	3.5461	1.18313
ACKR1+ VEC	TMEM131	0.571191	0.172303	2.5196e-66	1.75897e-65	0.548207	34.9329	26.7817
ACKR1+ VEC	LIN52	0.285447	0.130355	2.83675e-66	1.97974e-65	0.533878	17.4589	11.1401
ACKR1+ VEC	ST3GAL2	0.239757	0.104815	4.6905e-66	3.26719e-65	0.532473	16.4177	10.1544
ACKR1+ VEC	LRRFIP2	0.627738	0.188854	5.61917e-66	3.90907e-65	0.549497	36.8945	29.1546
ACKR1+ VEC	ATG7	0.812639	0.185025	6.18375e-66	4.30046e-65	0.55156	43.3228	33.0155
ACKR1+ VEC	DPH6	0.58177	0.198254	6.84067e-66	4.75278e-65	0.545237	30.3456	22.6987
ACKR1+ VEC	ZNF420	0.210476	0.103797	7.51316e-66	5.21835e-65	0.529339	13.7468	8.12889
ACKR1+ VEC	PUM2	0.77875	0.193515	7.56457e-66	5.25239e-65	0.553031	44.7412	36.3342
ACKR1+ VEC	ZFP2	0.0974034	0.0587887	1.28944e-65	8.93892e-65	0.518694	6.80549	3.11187
ACKR1+ VEC	TFCP2	0.525857	0.171209	1.51245e-65	1.04749e-64	0.545061	30.5266	22.621
ACKR1+ VEC	HES1	0.192075	0.0964418	1.70027e-65	1.17645e-64	0.526362	11.6191	6.47286
ACKR1+ VEC	CD79B	0.0355527	0.0209647	2.08877e-65	1.4448e-64	0.511407	3.41029	1.1179
ACKR1+ VEC	FMO5	0.145093	0.0730614	2.71336e-65	1.87505e-64	0.523851	9.95926	5.23595
ACKR1+ VEC	PIP5K1C	0.164505	0.0815765	2.88054e-65	1.98995e-64	0.527027	12.1322	6.85971
ACKR1+ VEC	TMEM233	0.0849532	0.0529808	2.91078e-65	2.01021e-64	0.515756	5.32669	2.19035
ACKR1+ VEC	EOGT	0.159892	0.0826913	2.97409e-65	2.05328e-64	0.526249	11.5437	6.44059
ACKR1+ VEC	IZUMO3	0.0111812	0.0103843	3.28215e-65	2.26381e-64	0.502806	0.618681	0.0575951
ACKR1+ VEC	MAPK8	0.642902	0.204398	3.45591e-65	2.38215e-64	0.548032	34.5707	27.205
ACKR1+ VEC	AVL9	0.594751	0.172239	5.07605e-65	3.49671e-64	0.54723	34.5707	26.0059
ACKR1+ VEC	DHX15	0.446466	0.154424	8.95854e-65	6.15956e-64	0.544394	29.6665	22.1051
ACKR1+ VEC	NBAS	0.603696	0.178779	1.07637e-64	7.39607e-64	0.547817	35.2648	27.1443
ACKR1+ VEC	ZNF467	0.0724163	0.0423556	1.21328e-64	8.33418e-64	0.517213	6.09627	2.66082
ACKR1+ VEC	NUMB	0.816512	0.193192	1.2181e-64	8.36464e-64	0.553011	46.22	37.4826
ACKR1+ VEC	HGSNAT	0.549594	0.178649	1.96215e-64	1.34445e-63	0.54719	33.7257	26.3133
ACKR1+ VEC	TTLL5	0.423603	0.146671	3.20947e-64	2.19427e-63	0.540934	25.7583	18.1449
ACKR1+ VEC	CTPS2	0.254784	0.113338	3.54694e-64	2.42424e-63	0.532609	16.7648	10.6058
ACKR1+ VEC	ACR	0.00890455	0.00791552	4.38867e-64	2.99767e-63	0.503223	0.72431	0.0798004
ACKR1+ VEC	GPR68	0.0425353	0.0285657	5.4771e-64	3.73995e-63	0.510609	3.1085	0.985362
ACKR1+ VEC	MON2	0.89317	0.203195	5.84342e-64	3.98884e-63	0.55355	48.4231	39.6112
ACKR1+ VEC	MAP4K5	0.598894	0.177928	6.18359e-64	4.2184e-63	0.548001	35.8835	27.935
ACKR1+ VEC	XRN2	0.537049	0.176938	7.96251e-64	5.42688e-63	0.546935	33.4993	26.279
ACKR1+ VEC	UBR5	0.849606	0.196392	8.2869e-64	5.64621e-63	0.553123	47.4876	38.6543
ACKR1+ VEC	HDX	0.21423	0.0983878	1.12942e-63	7.68564e-63	0.528295	13.3243	7.7972
ACKR1+ VEC	LSG1	0.218774	0.0967787	1.78922e-63	1.21604e-62	0.531022	15.5877	9.59756
ACKR1+ VEC	MTX2	0.381228	0.146872	2.02934e-63	1.37709e-62	0.540217	24.6718	17.6578
ACKR1+ VEC	UIMC1	0.440366	0.153845	2.26638e-63	1.53508e-62	0.542479	27.7199	20.2912
ACKR1+ VEC	SHQ1	0.206849	0.0975565	2.663e-63	1.80204e-62	0.52897	13.8524	8.26975
ACKR1+ VEC	CTSH	0.284574	0.116634	2.77514e-63	1.87735e-62	0.534432	18.7264	12.2122
ACKR1+ VEC	PIK3CA	0.57598	0.177285	3.47462e-63	2.3469e-62	0.54691	34.3293	26.6166
ACKR1+ VEC	ATG2B	0.355601	0.135348	5.16828e-63	3.48548e-62	0.538671	23.2232	16.1627
ACKR1+ VEC	MDN1	0.368094	0.133378	5.39184e-63	3.63512e-62	0.539186	23.9777	16.6956
ACKR1+ VEC	MAP3K4	0.381754	0.137389	6.56619e-63	4.42003e-62	0.540131	25.0641	17.7396
ACKR1+ VEC	HLA-DMA	0.268188	0.0920448	7.27427e-63	4.89517e-62	0.532604	17.5192	10.8515
ACKR1+ VEC	ATR	0.506335	0.163307	7.70962e-63	5.18653e-62	0.543557	29.6514	21.9014
ACKR1+ VEC	ZNF718	0.239824	0.102953	1.44135e-62	9.68454e-62	0.531699	16.3422	10.2464
ACKR1+ VEC	CEP57	0.383739	0.140706	1.65454e-62	1.11033e-61	0.540275	25.3207	18.0481
ACKR1+ VEC	SLC10A7	0.356627	0.137111	1.95673e-62	1.31272e-61	0.537504	22.0914	15.1829
ACKR1+ VEC	KIFC3	0.209294	0.0910589	1.98579e-62	1.33099e-61	0.529306	14.3806	8.61671
ACKR1+ VEC	ARID2	0.680678	0.183724	2.10583e-62	1.41058e-61	0.549005	38.9166	30.8304
ACKR1+ VEC	ASAP2	0.501903	0.157215	3.51387e-62	2.34799e-61	0.544073	30.8133	22.9246
ACKR1+ VEC	LRPPRC	0.462278	0.158877	3.81656e-62	2.54792e-61	0.543384	29.3647	22.0117
ACKR1+ VEC	SDK2	0.0586033	0.0403018	4.46306e-62	2.97679e-61	0.511834	3.63664	1.27715
ACKR1+ VEC	MAP3K1	0.472287	0.150984	4.90756e-62	3.27226e-61	0.542103	28.2481	20.3901
ACKR1+ VEC	ZNF343	0.0658641	0.0431494	5.96423e-62	3.97439e-61	0.514529	4.84382	1.95858
ACKR1+ VEC	BTBD10	0.298245	0.121636	6.96113e-62	4.63446e-61	0.534934	19.5111	12.9752
ACKR1+ VEC	PLPP2	0.0270383	0.0192126	8.34352e-62	5.54635e-61	0.508389	2.30874	0.629383
ACKR1+ VEC	SMC1B	0.062701	0.0431977	1.00371e-61	6.6661e-61	0.511961	3.697	1.31393
ACKR1+ VEC	WDR70	0.759126	0.18672	1.02529e-61	6.80733e-61	0.550428	42.6739	34.344
ACKR1+ VEC	SMG6	0.655183	0.178576	1.03601e-61	6.87434e-61	0.547965	37.6641	29.4013
ACKR1+ VEC	CAMKMT	0.674795	0.194972	1.0735e-61	7.11873e-61	0.545872	33.9973	25.8588
ACKR1+ VEC	SEMA6A-AS2	0.0151072	0.0126257	1.50692e-61	9.9717e-61	0.504553	1.08646	0.175908
ACKR1+ VEC	NCOR1	0.959476	0.201266	4.32216e-61	2.84715e-60	0.554254	52.4672	45.727
ACKR1+ VEC	FOCAD	0.509624	0.164352	4.73197e-61	3.11523e-60	0.542762	29.2893	21.7012
ACKR1+ VEC	SDCBP2	0.0351704	0.0254892	5.46765e-61	3.59846e-60	0.509759	2.82179	0.873641
ACKR1+ VEC	PPP3CB	0.621991	0.181063	5.8264e-61	3.83226e-60	0.547629	36.7587	29.3568
ACKR1+ VEC	CXXC4-AS1	0.0332636	0.0241045	6.26262e-61	4.11794e-60	0.507894	2.14275	0.56346
ACKR1+ VEC	ZMAT1	0.299377	0.11909	6.30225e-61	4.14276e-60	0.534939	19.7827	13.2261
ACKR1+ VEC	KATNBL1	0.552547	0.167755	6.56727e-61	4.31566e-60	0.546245	34.4802	26.9732
ACKR1+ VEC	HDAC1	0.169644	0.0777767	6.80219e-61	4.4687e-60	0.526713	12.4943	7.23096
ACKR1+ VEC	TNKS	0.659266	0.177931	7.2418e-61	4.75464e-60	0.54798	38.1922	30.0629
ACKR1+ VEC	TBC1D15	0.484145	0.165696	7.53196e-61	4.94366e-60	0.544211	30.8888	23.844
ACKR1+ VEC	C1orf21	0.631609	0.167085	8.48781e-61	5.56769e-60	0.54641	35.959	27.2983
ACKR1+ VEC	PTK2B	0.361164	0.131727	8.49114e-61	5.5682e-60	0.537596	22.8007	15.7849
ACKR1+ VEC	HLA-DQA1	0.227133	0.051586	1.08564e-60	7.11501e-60	0.52823	14.2146	8.18267
ACKR1+ VEC	FBXW7	0.721187	0.200863	1.24128e-60	8.12527e-60	0.548778	39.0071	31.8334
ACKR1+ VEC	ZXDC	0.36927	0.133228	1.52323e-60	9.95595e-60	0.538748	24.1286	17.0842
ACKR1+ VEC	ANKMY1	0.230796	0.100222	1.71046e-60	1.11763e-59	0.530056	15.2558	9.45531
ACKR1+ VEC	CASP4	0.409044	0.147329	1.78168e-60	1.16382e-59	0.541126	26.9805	19.8713
ACKR1+ VEC	PLOD2	0.438468	0.133042	1.89809e-60	1.23949e-59	0.540503	27.0862	19.1039
ACKR1+ VEC	IQCJ-SCHIP1	0.240696	0.108773	2.00936e-60	1.31137e-59	0.529031	14.3655	8.76347
ACKR1+ VEC	ZNF454	0.0479376	0.0315462	2.02379e-60	1.32039e-59	0.511699	3.62155	1.28444
ACKR1+ VEC	POGZ	0.713484	0.186377	2.13973e-60	1.3952e-59	0.5494	41.1348	33.3243
ACKR1+ VEC	TNFRSF11B	0.0567354	0.0370889	2.1583e-60	1.40689e-59	0.513477	4.40622	1.72265
ACKR1+ VEC	UGCG	0.384055	0.159705	2.48782e-60	1.61975e-59	0.53828	23.1326	16.6682
ACKR1+ VEC	ADRA2C	0.0130905	0.00872453	2.78788e-60	1.81349e-59	0.506333	1.6297	0.36049
ACKR1+ VEC	SLC38A9	0.381672	0.136447	2.97287e-60	1.93325e-59	0.538197	23.6608	16.5929
ACKR1+ VEC	FBXL4	0.422881	0.149322	5.72281e-60	3.71268e-59	0.540324	26.1959	19.1087
ACKR1+ VEC	MICAL3	0.418257	0.137569	5.7559e-60	3.73304e-59	0.539811	26.045	18.4911
ACKR1+ VEC	VSTM5	0.0244642	0.0189565	5.98458e-60	3.8802e-59	0.506662	1.73533	0.403166
ACKR1+ VEC	AGBL3	0.261162	0.117559	9.16375e-60	5.93266e-59	0.530462	15.6632	9.8845
ACKR1+ VEC	HK1	0.251292	0.104925	1.14734e-59	7.42132e-59	0.532098	17.2778	11.1474
ACKR1+ VEC	DPP8	0.394059	0.138707	1.15501e-59	7.46878e-59	0.539886	25.8337	18.7111
ACKR1+ VEC	ANKAR	0.550339	0.168352	1.22679e-59	7.92823e-59	0.543925	31.7338	24.0838
ACKR1+ VEC	FBXO11	0.883525	0.200729	1.37207e-59	8.85925e-59	0.551732	47.5177	39.9172
ACKR1+ VEC	ADAM10	0.587245	0.167664	1.60715e-59	1.03648e-58	0.54602	35.4006	27.5135
ACKR1+ VEC	ST3GAL3	0.413195	0.143031	1.83079e-59	1.17967e-58	0.539112	25.0792	17.8895
ACKR1+ VEC	NRG1	0.123753	0.081852	1.93789e-59	1.24831e-58	0.516846	6.09627	2.7885
ACKR1+ VEC	NMRK1	0.254497	0.104362	1.95989e-59	1.26211e-58	0.532457	17.7154	11.4864
ACKR1+ VEC	IZUMO1	0.0127893	0.010827	2.01977e-59	1.2999e-58	0.504097	0.965746	0.146416
ACKR1+ VEC	DENND4C	0.829854	0.182141	3.03118e-59	1.94682e-58	0.550481	46.3558	36.9552
ACKR1+ VEC	TRIM56	0.353337	0.129161	3.08803e-59	1.98275e-58	0.537953	23.6155	16.6932
ACKR1+ VEC	PPP2R2A	0.651414	0.18302	4.93292e-59	3.15895e-58	0.548117	38.7204	31.8532
ACKR1+ VEC	RALY	0.507766	0.172373	5.03102e-59	3.22083e-58	0.544393	31.93	25.1819
ACKR1+ VEC	BIN3	0.241354	0.11244	5.1885e-59	3.32067e-58	0.530593	15.8443	10.1308
ACKR1+ VEC	RARS2	0.459893	0.151446	6.92624e-59	4.43024e-58	0.54223	29.2742	22.0617
ACKR1+ VEC	RREB1	0.648468	0.173892	1.22167e-58	7.79592e-58	0.546701	37.483	29.3718
ACKR1+ VEC	NPTXR	0.0328269	0.0230028	1.78311e-58	1.13521e-57	0.509256	2.67089	0.819863
ACKR1+ VEC	ODF2	0.166122	0.0802779	1.87868e-58	1.19571e-57	0.525486	11.8153	6.83786
ACKR1+ VEC	DNMT3B	0.0351285	0.0258119	1.9635e-58	1.24933e-57	0.509225	2.6558	0.815005
ACKR1+ VEC	SDCCAG8	0.825507	0.193567	2.88621e-58	1.83535e-57	0.549981	44.877	36.8137
ACKR1+ VEC	INTS12	0.229247	0.100722	3.05002e-58	1.93839e-57	0.529589	15.2407	9.54101
ACKR1+ VEC	LINC02516	0.0548011	0.0385997	3.82644e-58	2.4283e-57	0.511846	3.72718	1.37465
ACKR1+ VEC	HECTD2	0.360633	0.127045	3.87859e-58	2.46068e-57	0.536568	22.5743	15.6097
ACKR1+ VEC	CECR2	0.114162	0.0642496	7.89673e-58	4.99684e-57	0.518492	7.15256	3.49248
ACKR1+ VEC	TTC23	0.255315	0.110694	8.45545e-58	5.34883e-57	0.531572	17.0665	11.1488
ACKR1+ VEC	TANGO6	0.350384	0.125448	1.02281e-57	6.46455e-57	0.536216	22.2122	15.3904
ACKR1+ VEC	LINC01537	0.013299	0.0117596	1.74359e-57	1.10042e-56	0.503914	0.920477	0.138089
ACKR1+ VEC	DIP2A	0.456828	0.141806	1.77398e-57	1.11928e-56	0.54152	29.3949	21.7952
ACKR1+ VEC	MAST2	0.298717	0.124385	2.25605e-57	1.42139e-56	0.532881	18.485	12.3482
ACKR1+ VEC	SLC24A1	0.127446	0.0663612	3.1758e-57	1.99856e-56	0.520837	8.66154	4.5455
ACKR1+ VEC	SCAF8	0.617415	0.170307	7.68863e-57	4.82046e-56	0.545656	36.3664	28.8198
ACKR1+ VEC	BAZ2A	0.36966	0.13508	8.51959e-57	5.33684e-56	0.538348	24.8529	18.0772
ACKR1+ VEC	ZDHHC15	0.12208	0.0644394	1.1546e-56	7.22644e-56	0.520236	8.31447	4.31859
ACKR1+ VEC	OAS3	0.0618121	0.0361247	1.27796e-56	7.99167e-56	0.514333	4.96454	2.09945
ACKR1+ VEC	C11orf42	0.037687	0.0274516	1.31598e-56	8.22467e-56	0.508594	2.44455	0.728613
ACKR1+ VEC	PICART1	0.0152664	0.0127066	1.37673e-56	8.597e-56	0.504543	1.10155	0.192909
ACKR1+ VEC	CDYL	0.433199	0.145986	1.47332e-56	9.19224e-56	0.540355	27.6898	20.6898
ACKR1+ VEC	VSX2	0.00712177	0.00630995	1.74743e-56	1.089e-55	0.502581	0.573412	0.0572481
ACKR1+ VEC	PELI1	0.444678	0.132738	1.79889e-56	1.12075e-55	0.539235	26.8447	19.2746
ACKR1+ VEC	PLAC4	0.0129331	0.0108156	1.81732e-56	1.13191e-55	0.504279	1.02611	0.170357
ACKR1+ VEC	SRGAP2	0.478239	0.130507	2.06708e-56	1.28674e-55	0.54125	30.1192	21.9645
ACKR1+ VEC	KMT2C	1.06495	0.200237	2.96562e-56	1.84345e-55	0.552661	55.8322	48.3053
ACKR1+ VEC	SP110	0.3723	0.131066	4.20568e-56	2.61056e-55	0.537174	23.8419	16.9982
ACKR1+ VEC	ATP13A2	0.106169	0.0558278	6.37613e-56	3.95107e-55	0.519532	7.93723	4.06566
ACKR1+ VEC	KANSL1	1.09824	0.207621	1.14583e-55	7.0802e-55	0.552314	55.2135	48.0572
ACKR1+ VEC	A2ML1-AS1	0.191032	0.0959566	1.72143e-55	1.06189e-54	0.524933	11.6946	6.91662
ACKR1+ VEC	TNPO1	0.542046	0.165819	2.00401e-55	1.2355e-54	0.543829	33.439	26.6114
ACKR1+ VEC	RAVER2	0.151898	0.0700736	2.44601e-55	1.50546e-54	0.523425	10.6987	6.05859
ACKR1+ VEC	INVS	0.598489	0.175679	2.78731e-55	1.71407e-54	0.542799	32.2921	24.9796
ACKR1+ VEC	GBP1	0.147221	0.0684903	4.15538e-55	2.55106e-54	0.52325	10.593	5.98954
ACKR1+ VEC	CLEC4F	0.0221567	0.0182829	4.81861e-55	2.95573e-54	0.505328	1.34299	0.278261
ACKR1+ VEC	AKR1E2	0.0851775	0.0524517	5.82935e-55	3.57371e-54	0.515971	5.86993	2.71703
ACKR1+ VEC	WWP2	0.38898	0.135562	9.48859e-55	5.80724e-54	0.537314	24.4304	17.7053
ACKR1+ VEC	FGD1	0.0901192	0.0493754	1.29313e-54	7.90761e-54	0.51722	6.62442	3.20173
ACKR1+ VEC	NF1	0.859174	0.193597	1.37416e-54	8.40075e-54	0.548938	45.9182	38.4766
ACKR1+ VEC	RBM26	0.809756	0.181951	1.41784e-54	8.66295e-54	0.548895	45.7673	38.3736
ACKR1+ VEC	PPP5C	0.180754	0.0832542	1.65111e-54	1.00854e-53	0.526331	13.0225	7.9509
ACKR1+ VEC	PACS2	0.29809	0.115816	2.21052e-54	1.34873e-53	0.533948	20.4617	14.202
ACKR1+ VEC	LINC02301	0.0159228	0.0130073	4.33309e-54	2.6335e-53	0.504508	1.10155	0.199848
ACKR1+ VEC	KITLG	0.243745	0.0968024	4.52238e-54	2.74702e-53	0.529476	16.0555	10.3154
ACKR1+ VEC	TRIOBP	0.336561	0.121656	4.9139e-54	2.98318e-53	0.53592	22.9365	16.3945
ACKR1+ VEC	GPER1	0.0542837	0.0338773	7.19327e-54	4.36211e-53	0.512728	4.27041	1.73271
ACKR1+ VEC	CEACAM16	0.00711185	0.0064599	7.58581e-54	4.59887e-53	0.502324	0.513053	0.0482272
ACKR1+ VEC	AGTPBP1	0.415405	0.133628	8.0941e-54	4.90566e-53	0.537405	25.2301	18.2046
ACKR1+ VEC	MTHFD1L	0.336232	0.13318	8.82325e-54	5.34609e-53	0.532685	19.2395	13.1671
ACKR1+ VEC	PUS10	0.183682	0.0884587	1.22142e-53	7.38639e-53	0.525237	12.2227	7.3798
ACKR1+ VEC	RBPMS	1.02554	0.167301	1.51675e-53	9.16216e-53	0.549172	53.4027	40.4626
ACKR1+ VEC	ZNF148	0.732374	0.179777	1.89562e-53	1.14381e-52	0.547058	41.7987	34.955
ACKR1+ VEC	LINC00323	0.00887972	0.00769472	2.07675e-53	1.25104e-52	0.503263	0.754489	0.102006
ACKR1+ VEC	PRSS48	0.114791	0.0669159	2.26197e-53	1.36223e-52	0.517573	6.88094	3.42691
ACKR1+ VEC	TTLL10	0.0192435	0.0152955	2.35369e-53	1.41669e-52	0.505439	1.38826	0.300813
ACKR1+ VEC	STRN3	0.651067	0.167828	2.52872e-53	1.52162e-52	0.545184	38.1772	30.8456
ACKR1+ VEC	APAF1	0.220438	0.0918029	2.6536e-53	1.59589e-52	0.528732	15.4368	9.90462
ACKR1+ VEC	RHPN1	0.0343682	0.0233186	2.76709e-53	1.66368e-52	0.508844	2.59544	0.826108
ACKR1+ VEC	PIK3C3	0.445222	0.144394	2.79618e-53	1.68071e-52	0.539577	28.1424	21.3185
ACKR1+ VEC	LINC00513	0.600897	0.187052	2.95081e-53	1.77268e-52	0.541123	30.5568	23.6168
ACKR1+ VEC	AQR	0.380614	0.130469	3.96179e-53	2.37675e-52	0.537254	25.0038	18.3326
ACKR1+ VEC	CAPN11	0.0217938	0.0164026	4.13122e-53	2.47703e-52	0.506403	1.70515	0.424677
ACKR1+ VEC	B3GALNT1	0.0734872	0.0408916	4.56156e-53	2.73355e-52	0.515206	5.58322	2.54806
ACKR1+ VEC	PRKAB1	0.0812409	0.0461287	5.06374e-53	3.032e-52	0.516648	6.38298	3.08168
ACKR1+ VEC	TARBP1	0.24213	0.0982705	8.63696e-53	5.16303e-52	0.529829	16.5837	10.9039
ACKR1+ VEC	MAPKAP1	0.545628	0.153253	9.40522e-53	5.6192e-52	0.542502	33.4541	26.2148
ACKR1+ VEC	TNFRSF10C	0.0314265	0.02317	9.8365e-53	5.87366e-52	0.507719	2.17293	0.63077
ACKR1+ VEC	CMSS1	0.602865	0.173354	9.86461e-53	5.88722e-52	0.542587	33.4239	26.3827
ACKR1+ VEC	PRRG4	0.0328383	0.0226641	1.51136e-52	9.00754e-52	0.50912	2.71616	0.893765
ACKR1+ VEC	HGF	0.125988	0.0601433	1.5717e-52	9.36458e-52	0.519778	8.4201	4.47299
ACKR1+ VEC	HECTD1	0.750467	0.176642	1.58379e-52	9.4315e-52	0.54736	43.6095	36.8071
ACKR1+ VEC	HOTAIRM1	0.210691	0.0926977	1.73933e-52	1.03521e-51	0.527951	14.8031	9.48133
ACKR1+ VEC	CAVIN1	0.569747	0.160223	1.91334e-52	1.13846e-51	0.540912	31.3264	23.7833
ACKR1+ VEC	FOXJ3	0.632099	0.161026	2.0518e-52	1.22052e-51	0.544393	37.5283	30.0345
ACKR1+ VEC	GAB2	0.626523	0.16363	2.17602e-52	1.29406e-51	0.542292	34.0124	26.0982
ACKR1+ VEC	AK4	0.157602	0.0771782	2.45601e-52	1.46017e-51	0.52362	11.1514	6.57
ACKR1+ VEC	XRCC3	0.0707252	0.0441931	4.90345e-52	2.90496e-51	0.51402	4.97963	2.19902
ACKR1+ VEC	TNS1	0.692765	0.125227	5.69387e-52	3.37139e-51	0.543877	39.7767	29.3211
ACKR1+ VEC	SLC16A14	0.0582834	0.0345931	5.94614e-52	3.51981e-51	0.512448	4.21005	1.72126
ACKR1+ VEC	CRTC3	0.479444	0.148672	6.70504e-52	3.96581e-51	0.539981	29.576	22.697
ACKR1+ VEC	TFEB	0.153105	0.0736382	8.32e-52	4.91569e-51	0.52314	10.8646	6.35697
ACKR1+ VEC	ANKIB1	0.648696	0.169127	1.21438e-51	7.16329e-51	0.544126	37.3019	30.1937
ACKR1+ VEC	ALG13-AS1	0.221428	0.100409	1.241e-51	7.31834e-51	0.526226	13.3997	8.38807
ACKR1+ VEC	PRRG1	0.0677034	0.0372704	1.39701e-51	8.23166e-51	0.515952	6.08118	2.90439
ACKR1+ VEC	SOX13	0.195162	0.0847087	1.54697e-51	9.10792e-51	0.526158	13.4299	8.3558
ACKR1+ VEC	ITGAV	0.464132	0.151887	1.63544e-51	9.6236e-51	0.539511	28.7913	22.2289
ACKR1+ VEC	LIMCH1	0.67118	0.129393	1.68386e-51	9.90582e-51	0.542581	37.0907	27.2432
ACKR1+ VEC	DIP2C	0.680346	0.161673	1.78641e-51	1.05063e-50	0.543935	38.1319	29.929
ACKR1+ VEC	ADCY9	0.317666	0.113956	2.78026e-51	1.63118e-50	0.531918	19.33	13.1924
ACKR1+ VEC	HERC1	0.847005	0.179284	3.02262e-51	1.7729e-50	0.547522	46.2955	38.9374
ACKR1+ VEC	BMP2K	0.447189	0.115928	3.09687e-51	1.81596e-50	0.537418	26.9202	19.4203
ACKR1+ VEC	ATL2	0.391148	0.13471	4.23234e-51	2.47713e-50	0.536767	25.0943	18.6632
ACKR1+ VEC	DEPDC1B	0.0289651	0.0224871	4.616e-51	2.70023e-50	0.506875	1.88622	0.514192
ACKR1+ VEC	LSR	0.112921	0.0493578	5.78794e-51	3.38216e-50	0.520046	8.79734	4.75888
ACKR1+ VEC	CRK	0.417688	0.146419	7.63287e-51	4.45309e-50	0.538256	27.0258	20.7995
ACKR1+ VEC	MYO1C	0.422544	0.141244	8.35751e-51	4.87194e-50	0.538007	26.9956	20.4643
ACKR1+ VEC	FAM78B	0.113758	0.0657875	8.43102e-51	4.91348e-50	0.518136	7.40908	3.8665
ACKR1+ VEC	FAM118B	0.130926	0.0656677	8.83271e-51	5.14483e-50	0.52103	9.41603	5.29389
ACKR1+ VEC	CRYBB3	0.0124982	0.0104502	9.0161e-51	5.25025e-50	0.503784	0.905387	0.148498
ACKR1+ VEC	TRHR	0.0227144	0.0186971	9.39361e-51	5.46863e-50	0.505341	1.37317	0.306364
ACKR1+ VEC	LINC00211	0.0108862	0.00909598	9.7677e-51	5.6849e-50	0.503514	0.829938	0.126987
ACKR1+ VEC	MSH2	0.176905	0.0771435	9.9045e-51	5.76298e-50	0.52469	12.3284	7.49395
ACKR1+ VEC	FLNB-AS1	0.0211079	0.0161556	1.00216e-50	5.82956e-50	0.505709	1.49389	0.352163
ACKR1+ VEC	ALG13	0.569197	0.170686	1.18403e-50	6.87833e-50	0.542418	33.786	27.7043
ACKR1+ VEC	CA4	0.0887044	0.0434503	1.52272e-50	8.82941e-50	0.514088	5.13053	2.29166
ACKR1+ VEC	RIPK3	0.041466	0.0264962	1.55372e-50	9.00439e-50	0.510339	3.27448	1.20846
ACKR1+ VEC	RNGTT	0.423865	0.137113	1.67215e-50	9.68304e-50	0.537046	25.9242	19.3152
ACKR1+ VEC	APLF	0.246238	0.103974	1.9178e-50	1.10909e-49	0.528268	15.5274	10.187
ACKR1+ VEC	FOXP1-AS1	0.0813684	0.0499582	2.6138e-50	1.50879e-49	0.514043	5.07017	2.28923
ACKR1+ VEC	ZNF235	0.261755	0.106794	3.97413e-50	2.28858e-49	0.528823	16.1762	10.7238
ACKR1+ VEC	ATXN2	0.777652	0.170738	6.7048e-50	3.85398e-49	0.545843	43.7151	36.0507
ACKR1+ VEC	RIPOR1	0.151995	0.068618	6.71763e-50	3.86034e-49	0.523443	11.423	6.82085
ACKR1+ VEC	NINJ2	0.179453	0.0864433	6.81409e-50	3.91474e-49	0.52435	12.0718	7.41207
ACKR1+ VEC	NGLY1	0.351539	0.123813	8.44205e-50	4.84492e-49	0.534965	23.2534	17.0298
ACKR1+ VEC	LRRC8C	0.129097	0.0592974	8.60588e-50	4.93764e-49	0.521467	9.91399	5.65403
ACKR1+ VEC	IFT140	0.193743	0.0890429	8.80174e-50	5.04737e-49	0.524737	12.4491	7.69103
ACKR1+ VEC	LAPTM4B	0.137032	0.0641494	1.14748e-49	6.57848e-49	0.522322	10.5478	6.16719
ACKR1+ VEC	NUTM2B-AS1	0.404883	0.133188	1.49427e-49	8.55541e-49	0.537033	26.2562	19.7926
ACKR1+ VEC	SLK	0.461366	0.14786	1.55865e-49	8.92172e-49	0.539052	29.1836	22.7466
ACKR1+ VEC	SLC37A1	0.108156	0.0540832	1.59116e-49	9.10538e-49	0.518523	7.8316	4.15656
ACKR1+ VEC	NPPC	0.00985042	0.0084388	1.75802e-49	1.00576e-48	0.503502	0.829938	0.129762
ACKR1+ VEC	NEAT1	2.95822	0.239072	2.15062e-49	1.2294e-48	0.55294	92.1986	87.5709
ACKR1+ VEC	RIMKLA	0.0197173	0.0152627	2.34099e-49	1.33788e-48	0.505586	1.46371	0.346958
ACKR1+ VEC	LUC7L3	1.25283	0.190268	2.6712e-49	1.52539e-48	0.550849	63.694	57.2523
ACKR1+ VEC	BARD1	0.106019	0.050069	3.39106e-49	1.93344e-48	0.518584	7.92214	4.21589
ACKR1+ VEC	LRP2BP	0.13702	0.068543	3.664e-49	2.08796e-48	0.520099	8.93315	4.98336
ACKR1+ VEC	SLC52A3	0.0103325	0.0085638	5.57968e-49	3.17053e-48	0.503603	0.860118	0.139477
ACKR1+ VEC	OR1C1	0.0079172	0.00736537	8.55831e-49	4.85801e-48	0.502117	0.467783	0.0444107
ACKR1+ VEC	PDCD6IP	0.634281	0.160231	1.25514e-48	7.10985e-48	0.543913	39.0976	32.7647
ACKR1+ VEC	MGAT3	0.0485477	0.033635	1.60453e-48	9.06781e-48	0.510969	3.60646	1.42773
ACKR1+ VEC	ELFN1	0.0363832	0.0243508	1.6535e-48	9.34215e-48	0.508887	2.70107	0.924644
ACKR1+ VEC	SEMA3F-AS1	0.0388271	0.0266554	2.39e-48	1.3479e-47	0.508921	2.71616	0.9354
ACKR1+ VEC	TNFRSF1A	0.427609	0.144192	2.58751e-48	1.45815e-47	0.537764	27.6143	21.5499
ACKR1+ VEC	MSANTD2	0.239477	0.0968359	2.85553e-48	1.60588e-47	0.528514	16.3422	10.9427
ACKR1+ VEC	HLA-DQB2	0.0305547	0.0182787	3.297e-48	1.85367e-47	0.508192	2.42946	0.786902
ACKR1+ VEC	PMS1	0.312894	0.116942	3.83239e-48	2.15302e-47	0.532167	20.3561	14.5271
ACKR1+ VEC	FUBP1	0.520585	0.144684	4.6965e-48	2.63508e-47	0.540774	33.3635	26.7408
ACKR1+ VEC	KRT7	0.0498664	0.0272835	5.12513e-48	2.8741e-47	0.511174	3.74227	1.4999
ACKR1+ VEC	CLCN3	0.313356	0.115093	5.56824e-48	3.12019e-47	0.53262	21.005	15.0833
ACKR1+ VEC	SGMS1	0.641358	0.14794	6.48752e-48	3.63344e-47	0.542074	37.0605	29.4002
ACKR1+ VEC	PACRGL	0.266319	0.104425	7.28442e-48	4.07558e-47	0.529753	17.7305	12.1866
ACKR1+ VEC	AP2B1	0.566578	0.158716	7.37628e-48	4.12592e-47	0.541971	35.3554	29.275
ACKR1+ VEC	SHISA5	0.24658	0.0955891	8.13814e-48	4.5509e-47	0.529847	17.8814	12.2896
ACKR1+ VEC	MAP4	0.964028	0.178117	8.84943e-48	4.94486e-47	0.547454	51.8485	44.4502
ACKR1+ VEC	MICAL2	0.218053	0.0869012	8.8818e-48	4.96167e-47	0.525864	13.943	8.89393
ACKR1+ VEC	KCTD3	0.382049	0.129545	9.03123e-48	5.04257e-47	0.535284	24.5662	18.3798
ACKR1+ VEC	XRN1	0.747869	0.171324	1.01326e-47	5.6532e-47	0.545053	42.9003	36.8005
ACKR1+ VEC	COA1	0.544856	0.148618	1.17384e-47	6.54405e-47	0.540281	32.8656	26.152
ACKR1+ VEC	TCAIM	0.305397	0.118076	1.18868e-47	6.62511e-47	0.530919	19.0735	13.3999
ACKR1+ VEC	CEP70	0.208113	0.0851933	1.7648e-47	9.82108e-47	0.526186	14.2749	9.20966
ACKR1+ VEC	DNAJC10	0.313772	0.113928	1.79373e-47	9.97956e-47	0.532843	21.4728	15.5375
ACKR1+ VEC	PIP4K2A	0.620896	0.147968	1.87638e-47	1.04367e-46	0.541756	36.5927	29.1827
ACKR1+ VEC	SENP5	0.497446	0.1425	2.14229e-47	1.19036e-46	0.539162	30.9944	24.3794
ACKR1+ VEC	GOLPH3L	0.213268	0.0903493	2.35867e-47	1.30926e-46	0.52657	14.6069	9.54517
ACKR1+ VEC	ZNF654	0.344913	0.124081	2.59136e-47	1.43805e-46	0.532798	21.4879	15.5524
ACKR1+ VEC	SEC16B	0.0421072	0.0300956	3.2315e-47	1.79239e-46	0.509017	2.77652	0.981545
ACKR1+ VEC	SFI1	0.200226	0.0797127	4.07555e-47	2.25826e-46	0.525512	13.7619	8.76764
ACKR1+ VEC	HSD17B3	0.0574129	0.0350544	4.25123e-47	2.3544e-46	0.511723	4.02897	1.69177
ACKR1+ VEC	MYO7B	0.0342196	0.0238945	4.947e-47	2.73765e-46	0.50823	2.45963	0.816393
ACKR1+ VEC	SRPK1	0.25887	0.0985613	4.98144e-47	2.75601e-46	0.529485	17.7607	12.1883
ACKR1+ VEC	ANKRD10	0.649588	0.159883	5.43777e-47	3.00619e-46	0.543263	39.3391	33.0648
ACKR1+ VEC	DNMT3A	0.306732	0.105598	6.14087e-47	3.39317e-46	0.531381	20.0996	14.1299
ACKR1+ VEC	CEP290	0.411401	0.128165	9.23879e-47	5.0985e-46	0.535165	25.1848	18.7333
ACKR1+ VEC	ESYT1	0.191671	0.0839024	1.00413e-46	5.53575e-46	0.52568	13.8826	8.98588
ACKR1+ VEC	LRRC70	0.00861082	0.00727422	1.27459e-46	7.01795e-46	0.503089	0.72431	0.106516
ACKR1+ VEC	COL25A1	0.166975	0.0751612	1.41397e-46	7.77953e-46	0.519662	8.93315	5.04998
ACKR1+ VEC	ZNF860	0.0195624	0.0142583	1.45873e-46	8.02373e-46	0.505737	1.53916	0.391369
ACKR1+ VEC	PPP1R12A	0.928305	0.175814	1.50699e-46	8.28714e-46	0.547047	51.0035	45.404
ACKR1+ VEC	TLK1	0.574823	0.151178	1.5221e-46	8.36807e-46	0.540963	34.9781	28.428
ACKR1+ VEC	BTBD1	0.286863	0.105873	1.59367e-46	8.75939e-46	0.53106	19.6771	13.9463
ACKR1+ VEC	NTF3	0.026643	0.0180622	1.65443e-46	9.09104e-46	0.506835	1.93149	0.563113
ACKR1+ VEC	LNX2	0.13638	0.0657678	1.73146e-46	9.50712e-46	0.520305	9.40094	5.42088
ACKR1+ VEC	SP140L	0.239057	0.0893664	2.04045e-46	1.11897e-45	0.528133	16.5384	11.1162
ACKR1+ VEC	FBXO39	0.0158274	0.0126956	2.34279e-46	1.28348e-45	0.504434	1.11664	0.230033
ACKR1+ VEC	SEC22A	0.370919	0.123644	2.37246e-46	1.29941e-45	0.53349	22.8761	16.7907
ACKR1+ VEC	CNIH3	0.24788	0.105696	2.38325e-46	1.30499e-45	0.526962	15.1501	10.1173
ACKR1+ VEC	CCDC191	0.19013	0.0822215	2.40931e-46	1.31893e-45	0.523985	12.4491	7.80032
ACKR1+ VEC	LPCAT3	0.248104	0.100194	2.8117e-46	1.53767e-45	0.528437	16.7648	11.4361
ACKR1+ VEC	UBA6	0.412375	0.134586	3.46608e-46	1.89506e-45	0.536032	26.3769	20.269
ACKR1+ VEC	SH2B3	0.265046	0.0837085	3.83772e-46	2.09773e-45	0.529233	18.0776	12.2195
ACKR1+ VEC	TTC23L	0.0427152	0.0289646	4.44271e-46	2.42781e-45	0.509017	2.8067	1.00791
ACKR1+ VEC	NIPBL	1.03638	0.17923	5.51913e-46	3.01303e-45	0.547576	54.7457	48.9909
ACKR1+ VEC	SMURF1	0.499396	0.140308	7.97449e-46	4.3437e-45	0.537427	29.3195	22.6154
ACKR1+ VEC	MCPH1-AS1	0.118922	0.0592759	8.05836e-46	4.38829e-45	0.517944	7.78633	4.23636
ACKR1+ VEC	NUP93	0.175337	0.0791595	8.17992e-46	4.45227e-45	0.523697	12.2529	7.69831
ACKR1+ VEC	IQCK	0.254036	0.101715	8.84844e-46	4.81374e-45	0.527482	15.9197	10.7165
ACKR1+ VEC	C4orf36	0.150788	0.0724502	9.36617e-46	5.09412e-45	0.520722	9.80836	5.76471
ACKR1+ VEC	FAM117A	0.178255	0.074775	1.1113e-45	6.04117e-45	0.523904	12.5396	7.87144
ACKR1+ VEC	DERA	0.38838	0.133733	1.21543e-45	6.60233e-45	0.53478	24.7322	18.8208
ACKR1+ VEC	HEATR5B	0.448669	0.132833	1.26567e-45	6.87181e-45	0.536654	27.9765	21.5367
ACKR1+ VEC	HBG2	0.155861	0.0738644	1.27491e-45	6.91852e-45	0.521024	10.0649	5.9663
ACKR1+ VEC	DKK4	0.00265076	0.00258216	1.66535e-45	9.02613e-45	0.500944	0.196167	0.00728613
ACKR1+ VEC	CHRNA7	0.0315419	0.0225906	1.74469e-45	9.45382e-45	0.507516	2.20311	0.702244
ACKR1+ VEC	SERPINE1	0.173891	0.0995696	1.77731e-45	9.62816e-45	0.518324	8.02777	4.46674
ACKR1+ VEC	NOCT	0.160023	0.0792288	1.82942e-45	9.90307e-45	0.521607	10.5176	6.3542
ACKR1+ VEC	ZNF586	0.314004	0.111144	1.85807e-45	1.00557e-44	0.531233	20.2958	14.5421
ACKR1+ VEC	NCOA7-AS1	0.119676	0.0664816	1.8629e-45	1.00793e-44	0.517014	7.15256	3.82105
ACKR1+ VEC	SNAPC3	0.30428	0.111849	2.0227e-45	1.09385e-44	0.531188	20.16	14.5091
ACKR1+ VEC	ALMS1	0.313753	0.11092	2.40521e-45	1.2991e-44	0.531102	20.1901	14.4408
ACKR1+ VEC	TMEM74B	0.0175321	0.0133432	2.80594e-45	1.51404e-44	0.504842	1.25245	0.283812
ACKR1+ VEC	COL23A1	0.0607518	0.0370941	3.28525e-45	1.77005e-44	0.511115	3.80263	1.58456
ACKR1+ VEC	PMM2	0.325122	0.118659	3.87287e-45	2.08459e-44	0.531988	21.2162	15.5375
ACKR1+ VEC	KRBOX4	0.217361	0.0949185	4.04481e-45	2.17553e-44	0.526155	14.6371	9.753
ACKR1+ VEC	ZBTB18	0.067957	0.0378029	4.28196e-45	2.30025e-44	0.514222	5.47759	2.64868
ACKR1+ VEC	SNHG7	0.377317	0.145613	4.58219e-45	2.46004e-44	0.534225	23.7061	18.3912
ACKR1+ VEC	TMEM241	0.410364	0.128316	5.18456e-45	2.78102e-44	0.534066	24.4002	18.1862
ACKR1+ VEC	FNDC3B	1.33156	0.205116	5.90571e-45	3.16551e-44	0.547891	63.1809	53.4875
ACKR1+ VEC	RAB3D	0.07281	0.0384927	5.9222e-45	3.17358e-44	0.515031	5.97555	2.9828
ACKR1+ VEC	ZNF292	0.787313	0.167251	6.19874e-45	3.32095e-44	0.544248	44.6959	38.5315
ACKR1+ VEC	MAMLD1	0.133404	0.0670735	6.68556e-45	3.58001e-44	0.519178	8.73699	4.98996
ACKR1+ VEC	THRB	0.767927	0.165084	7.52846e-45	4.02849e-44	0.541467	39.4145	31.202
ACKR1+ VEC	STAT5B	0.489853	0.138439	9.58355e-45	5.12304e-44	0.537581	30.1494	23.6456
ACKR1+ VEC	VPS50	0.355172	0.120884	1.01876e-44	5.44327e-44	0.532113	21.6991	15.8668
ACKR1+ VEC	TOGARAM1	0.334426	0.114793	1.07363e-44	5.73367e-44	0.531508	20.9899	15.1645
ACKR1+ VEC	PPIP5K2	0.501679	0.141873	1.07425e-44	5.73554e-44	0.538347	31.3717	25.0303
ACKR1+ VEC	RAB12	0.268083	0.102347	1.08151e-44	5.77148e-44	0.529519	18.4548	13.0016
ACKR1+ VEC	MTHFD2L	0.219877	0.0946479	1.11025e-44	5.92052e-44	0.526045	14.6522	9.77139
ACKR1+ VEC	GPCPD1	0.588342	0.15201	1.65218e-44	8.79111e-44	0.540407	35.5364	29.2482
ACKR1+ VEC	SBNO2	0.204166	0.0877669	3.07441e-44	1.6307e-43	0.525632	14.3957	9.53789
ACKR1+ VEC	VSIG2	0.0294837	0.0192463	4.38111e-44	2.32097e-43	0.507445	2.20311	0.712653
ACKR1+ VEC	NYNRIN	0.0705241	0.0367604	4.8826e-44	2.58476e-43	0.51452	5.73412	2.83847
ACKR1+ VEC	KLC1	0.357865	0.120463	4.90365e-44	2.59527e-43	0.533905	24.3851	18.4998
ACKR1+ VEC	CATSPER2	0.0987168	0.0489853	4.91775e-44	2.60211e-43	0.516658	7.0922	3.78462
ACKR1+ VEC	ARMCX4	0.471132	0.132018	5.15717e-44	2.72813e-43	0.535994	28.1274	21.5638
ACKR1+ VEC	WDFY3	0.783021	0.151029	6.20786e-44	3.27918e-43	0.542748	43.8962	35.5886
ACKR1+ VEC	SLX4IP	0.288135	0.11161	6.71817e-44	3.54702e-43	0.528803	17.821	12.5519
ACKR1+ VEC	LRCH3	0.570249	0.145137	6.73999e-44	3.55768e-43	0.53937	34.3293	27.6751
ACKR1+ VEC	LRATD2	0.0281528	0.0152125	7.22226e-44	3.80856e-43	0.508996	2.86706	1.05822
ACKR1+ VEC	SYNJ1	0.236943	0.0871728	8.65096e-44	4.55756e-43	0.527104	16.1762	10.9455
ACKR1+ VEC	GALK2	0.407934	0.120846	8.9511e-44	4.71341e-43	0.534547	25.9092	19.5403
ACKR1+ VEC	KANTR	0.265833	0.0986281	9.52121e-44	5.0112e-43	0.528225	17.3683	12.0242
ACKR1+ VEC	ZNF274	0.173191	0.0741841	1.01651e-43	5.34621e-43	0.523183	12.2378	7.74099
ACKR1+ VEC	SP6	0.00488463	0.00397754	1.06154e-43	5.58173e-43	0.502615	0.603591	0.0804943
ACKR1+ VEC	SETD3	0.311782	0.11187	1.3315e-43	6.9911e-43	0.531191	20.8843	15.271
ACKR1+ VEC	PLET1	0.0648326	0.0414197	1.33441e-43	7.0047e-43	0.511519	4.05915	1.77504
ACKR1+ VEC	CEP192	0.397719	0.12248	1.56684e-43	8.22081e-43	0.534087	25.1245	19.0334
ACKR1+ VEC	LYL1	0.0613349	0.0324962	1.66572e-43	8.73752e-43	0.513538	5.19089	2.4863
ACKR1+ VEC	ATP1A1	0.605945	0.183915	1.69679e-43	8.89837e-43	0.539543	33.4239	28.4589
ACKR1+ VEC	CSNK1G3	0.418606	0.136106	1.73009e-43	9.07082e-43	0.535135	26.3769	20.6
ACKR1+ VEC	SERPINI1	0.0898967	0.0468293	1.76283e-43	9.23804e-43	0.515438	6.33771	3.27182
ACKR1+ VEC	HLA-DRB5	0.241835	0.0643153	2.69111e-43	1.40723e-42	0.524669	14.0939	8.97061
ACKR1+ VEC	TBX1	0.0555764	0.0275309	2.73862e-43	1.43173e-42	0.511519	4.10442	1.78822
ACKR1+ VEC	IRAK2	0.125588	0.0637506	3.22277e-43	1.68403e-42	0.518781	8.64645	4.98093
ACKR1+ VEC	IGSF9B	0.0465365	0.0275956	3.52892e-43	1.84356e-42	0.510242	3.45556	1.40726
ACKR1+ VEC	WLS	0.35672	0.105171	3.69353e-43	1.92772e-42	0.532697	23.5702	17.341
ACKR1+ VEC	VTA1	0.293321	0.111275	3.69939e-43	1.93031e-42	0.529886	19.33	13.9734
ACKR1+ VEC	SLC25A30	0.0745326	0.0391866	4.0706e-43	2.12198e-42	0.514567	5.82466	2.92486
ACKR1+ VEC	CHD6	0.604621	0.148714	4.57321e-43	2.38114e-42	0.540125	36.5324	30.1469
ACKR1+ VEC	COL4A4	0.0717252	0.0462137	4.69844e-43	2.44518e-42	0.511505	4.07424	1.79516
ACKR1+ VEC	HSF1	0.211218	0.0918681	5.04431e-43	2.62331e-42	0.52598	14.9842	10.16
ACKR1+ VEC	PPM1H	0.112693	0.0543991	5.98821e-43	3.11048e-42	0.51681	7.30346	3.96539
ACKR1+ VEC	NHS	0.321294	0.115897	6.0705e-43	3.15172e-42	0.528517	17.9568	12.5939
ACKR1+ VEC	STXBP5	0.556129	0.140204	7.13752e-43	3.70483e-42	0.537861	32.3525	25.6492
ACKR1+ VEC	TUBGCP3	0.317985	0.107613	7.54176e-43	3.91279e-42	0.531101	21.2162	15.4983
ACKR1+ VEC	NUP214	0.431872	0.131604	8.37635e-43	4.34269e-42	0.535576	27.6898	21.739
ACKR1+ VEC	AP1S2	0.269761	0.0807643	8.53946e-43	4.42621e-42	0.529041	19.0433	13.1855
ACKR1+ VEC	KIF17	0.0206411	0.0129981	8.95281e-43	4.63826e-42	0.50673	1.94658	0.598156
ACKR1+ VEC	LRIG3	0.279723	0.101631	9.36901e-43	4.85158e-42	0.528882	18.4548	13.0411
ACKR1+ VEC	KIF21B	0.060286	0.0341579	1.48606e-42	7.67165e-42	0.511885	4.31568	1.94435
ACKR1+ VEC	WDR27	0.32571	0.106929	1.60391e-42	8.27613e-42	0.530564	20.7485	15.0053
ACKR1+ VEC	SENP6	0.91283	0.164973	1.91506e-42	9.87464e-42	0.544542	50.4602	44.1702
ACKR1+ VEC	IRF9	0.102894	0.0469191	2.14378e-42	1.10488e-41	0.517765	8.05794	4.52052
ACKR1+ VEC	LYPLA1	0.280966	0.101905	3.1525e-42	1.62208e-41	0.529884	19.7978	14.3499
ACKR1+ VEC	KAT2A	0.136613	0.0640936	4.17998e-42	2.1452e-41	0.520103	9.85363	5.93091
ACKR1+ VEC	CDIP1	0.116688	0.0572383	4.28021e-42	2.19612e-41	0.518628	8.69172	5.04061
ACKR1+ VEC	SPG11	0.562656	0.138777	4.33081e-42	2.22104e-41	0.538562	34.284	27.7733
ACKR1+ VEC	APOL1	0.1354	0.0576555	4.47858e-42	2.29629e-41	0.52039	10.1554	6.11826
ACKR1+ VEC	ZNF532	0.349344	0.116829	4.60697e-42	2.36156e-41	0.531718	22.348	16.6422
ACKR1+ VEC	MPZL3	0.103069	0.0457597	4.94148e-42	2.53184e-41	0.516602	7.28837	3.95533
ACKR1+ VEC	RIOX2	0.127575	0.0603739	5.11142e-42	2.61768e-41	0.519765	9.5971	5.73279
ACKR1+ VEC	MPRIP	0.420729	0.124727	5.50288e-42	2.81618e-41	0.53525	27.7954	21.7873
ACKR1+ VEC	PKN2	0.881572	0.164117	5.7836e-42	2.95846e-41	0.543778	48.9362	42.2273
ACKR1+ VEC	ARFIP1	0.447251	0.138068	7.6195e-42	3.89119e-41	0.535184	27.5841	21.7855
ACKR1+ VEC	CATSPERE	0.139891	0.0661603	8.09902e-42	4.1351e-41	0.518871	8.91806	5.22034
ACKR1+ VEC	HEATR1	0.272897	0.100784	8.19453e-42	4.18289e-41	0.528513	18.3039	13.0064
ACKR1+ VEC	FAM104A	0.18247	0.0773986	8.5036e-42	4.33964e-41	0.523911	13.3092	8.72947
[truncated: 199,385+ more rows]

## Sheet: S5
Single-cell RNA-seq @ labels.l1						Single-cell RNA-seq @ labels.l2							Bulk RNA-seq
Celltype	Variable	Effect size	ci.min	ci.max		Celltype	Population	Variable	Effect size	ci.min	ci.max		Celltype	Variable	Difference	ci.min	ci.max
Adipocyte	Weight	-0.517441	-1.12507	0.0901841		VEC	ACKR1+ VEC	Weight	-0.3003	-0.901601	0.301001		Adipocyte	Gender	-0.252326	-0.368577	-0.136076
Adipocyte	Gender	-0.453225	-1.23703	0.330583		VEC	ACKR1+ VEC	Gender	-0.0698631	-0.848144	0.708418		Adipocyte	Depot	-0.339774	-0.450651	-0.228898
Adipocyte	Depot	0.240633	-0.369766	0.851032		VEC	ACKR1+ VEC	Depot	0.622188	0.000286787	1.24409		B cell	Gender	0.00159002	-0.114251	0.117431
B cell	Weight	-0.227626	-0.827552	0.372299		VEC	BTNL9+ VEC	Weight	-0.243665	-0.843862	0.356532		B cell	Depot	0.267196	0.156616	0.377776
B cell	Gender	0.0146848	-0.763467	0.792837		VEC	BTNL9+ VEC	Gender	-0.843716	-1.64131	-0.04612		CD4+ T cell	Gender	0.120486	0.00455123	0.236421
B cell	Depot	0.520377	-0.0974843	1.13824		VEC	BTNL9+ VEC	Depot	0.893794	0.2578	1.52979		CD4+ T cell	Depot	0.356252	0.245299	0.467206
CD4+ T cell	Weight	-0.0398823	-0.638003	0.558239		DC	CCR7+ DC	Weight	-0.206604	-0.806202	0.392994		CD8+ T cell	Gender	0.0150762	-0.100767	0.130919
CD4+ T cell	Gender	0.480928	-0.30359	1.26545		DC	CCR7+ DC	Gender	0.487082	-0.2976	1.27176		CD8+ T cell	Depot	0.391115	0.279986	0.502244
CD4+ T cell	Depot	0.13999	-0.469057	0.749036		DC	CCR7+ DC	Depot	0.451775	-0.163758	1.06731		DC	Gender	-0.222331	-0.338491	-0.106172
CD8+ T cell	Weight	0.334839	-0.267246	0.936925		DC	CD1C+ DC	Weight	0.118996	-0.479578	0.717569		DC	Depot	0.0287673	-0.0813356	0.13887
CD8+ T cell	Gender	0.546495	-0.239869	1.33286		DC	CD1C+ DC	Gender	0.658102	-0.131935	1.44814		FAP	Gender	0.261362	0.145082	0.377642
CD8+ T cell	Depot	0.387185	-0.22645	1.00082		DC	CD1C+ DC	Depot	0.488486	-0.128254	1.10523		FAP	Depot	0.314628	0.203862	0.425394
DC	Weight	0.0734082	-0.524849	0.671666		NK cell	CD247+ NK cell	Weight	0.0543757	-0.543794	0.652546		ILC	Gender	-0.172627	-0.28866	-0.0565935
DC	Gender	0.68682	-0.104268	1.47791		NK cell	CD247+ NK cell	Gender	0.349125	-0.432386	1.13064		ILC	Depot	-0.147704	-0.257949	-0.0374586
DC	Depot	0.536819	-0.0816477	1.15529		NK cell	CD247+ NK cell	Depot	0.672473	0.048322	1.29662		LEC	Gender	-0.0403724	-0.156224	0.0754795
Endometrium	Weight	0.0915714	-0.506794	0.689937		CD4+ T cell	CD40LG+ CD4+ T cell	Weight	0.091074	-0.507288	0.689436		LEC	Depot	-0.483347	-0.595015	-0.371678
Endometrium	Gender	0.284055	-0.49632	1.06443		CD4+ T cell	CD40LG+ CD4+ T cell	Gender	0.459297	-0.324664	1.24326		Macrophage	Gender	0.111568	-0.00435368	0.227489
Endometrium	Depot	-0.756112	-1.38437	-0.127854		CD4+ T cell	CD40LG+ CD4+ T cell	Depot	0.0901869	-0.518454	0.698828		Macrophage	Depot	-0.659333	-0.772337	-0.546329
FAP	Weight	0.645937	0.0330389	1.25883		DC	CLEC9A+ DC	Weight	-0.0972287	-0.695633	0.501175		Mast	Gender	0.0152461	-0.100597	0.131089
FAP	Gender	0.198967	-0.580273	0.978208		DC	CLEC9A+ DC	Gender	0.718029	-0.0742518	1.51031		Mast	Depot	-0.00242425	-0.112522	0.107673
FAP	Depot	1.2732	0.60996	1.93644		DC	CLEC9A+ DC	Depot	0.701468	0.0759452	1.32699		Monocyte	Gender	-0.151497	-0.267486	-0.0355075
ILC	Weight	0.401934	-0.201917	1.00578		Adipocyte	CLSTN2+ Adipocyte	Weight	-0.461869	-1.06756	0.143824		Monocyte	Depot	-0.18732	-0.297655	-0.0769857
ILC	Gender	0.371117	-0.41083	1.15306		Adipocyte	CLSTN2+ Adipocyte	Gender	-0.488807	-1.27353	0.295921		Mural	Gender	0.0547117	-0.061149	0.170572
ILC	Depot	0.455765	-0.159895	1.07143		Adipocyte	CLSTN2+ Adipocyte	Depot	0.279125	-0.331979	0.89023		Mural	Depot	-0.0511052	-0.16122	0.0590098
LEC	Weight	0.0656659	-0.532553	0.663885		Mast	CPA3+ Mast	Weight	0.00329855	-0.594766	0.601363		NK cell	Gender	-0.0748567	-0.190734	0.0410209
LEC	Gender	-0.802537	-1.5983	-0.00677255		Mast	CPA3+ Mast	Gender	-0.401687	-1.18428	0.38091		NK cell	Depot	0.188417	0.0780792	0.298754
LEC	Depot	-1.39819	-2.07218	-0.724196		Mast	CPA3+ Mast	Depot	0.760754	0.132255	1.38925		pDC	Gender	-0.217174	-0.333319	-0.101029
Macrophage	Weight	-0.452249	-1.05763	0.153132		Monocyte	CSF3R+ Monocyte	Weight	-0.298815	-0.900084	0.302454		pDC	Depot	-0.580686	-0.693044	-0.468327
Macrophage	Gender	0.158933	-0.619911	0.937778		Monocyte	CSF3R+ Monocyte	Gender	-1.14606	-1.95973	-0.332391		Schwann	Gender	-0.245968	-0.362198	-0.129738
Macrophage	Depot	-0.396315	-1.0102	0.217571		Monocyte	CSF3R+ Monocyte	Depot	0.540121	-0.0784699	1.15871		Schwann	Depot	-0.568745	-0.681012	-0.456478
Mast	Weight	0.00329855	-0.594766	0.601363		CD4+ T cell	CTLA4+ CD4+ T cell	Weight	0.130995	-0.467686	0.729676		VEC	Gender	-0.126718	-0.242663	-0.0107729
Mast	Gender	-0.401687	-1.18428	0.38091		CD4+ T cell	CTLA4+ CD4+ T cell	Gender	0.317592	-0.463339	1.09852		VEC	Depot	0.447362	0.335917	0.558807
Mast	Depot	0.760754	0.132255	1.38925		CD4+ T cell	CTLA4+ CD4+ T cell	Depot	0.628026	0.00587181	1.25018
Mesothelial	Weight	-0.190576	-0.789945	0.408794		FAP	CXCL14+ FAP	Weight	0.646436	0.0335151	1.25936
Mesothelial	Gender	-0.152296	-0.931083	0.626492		FAP	CXCL14+ FAP	Gender	0.408584	-0.374166	1.19134
Mesothelial	Depot	-3.1998	-4.10031	-2.29929		FAP	CXCL14+ FAP	Depot	1.02529	0.380806	1.66976
Monocyte	Weight	0.0409062	-0.557218	0.63903		Macrophage	CYP27A1+ Macrophage	Weight	0.128335	-0.470321	0.726991
Monocyte	Gender	0.287069	-0.493353	1.06749		Macrophage	CYP27A1+ Macrophage	Gender	-0.0543613	-0.832589	0.723866
Monocyte	Depot	0.869364	0.234829	1.5039		Macrophage	CYP27A1+ Macrophage	Depot	-1.05221	-1.69855	-0.405861
NK cell	Weight	0.0383308	-0.559786	0.636447		Adipocyte	DCN+ Adipocyte	Weight	-0.461651	-1.06734	0.144036
NK cell	Gender	0.448811	-0.334888	1.23251		Adipocyte	DCN+ Adipocyte	Gender	-0.332313	-1.11351	0.448882
NK cell	Depot	0.602984	-0.018102	1.22407		Adipocyte	DCN+ Adipocyte	Depot	-0.21269	-0.822642	0.397262
pDC	Weight	-0.146559	-0.745396	0.452277		Adipocyte	DGAT2+ Adipocyte	Weight	-0.595072	-1.20575	0.0156044
pDC	Gender	0.429343	-0.353886	1.21257		Adipocyte	DGAT2+ Adipocyte	Gender	-0.303573	-1.08426	0.477118
pDC	Depot	0.394879	-0.218968	1.00873		Adipocyte	DGAT2+ Adipocyte	Depot	0.549523	-0.0694238	1.16847
Pericyte	Weight	0.15134	-0.447547	0.750228		FAP	DPP4+ FAP	Weight	0.033113	-0.56499	0.631216
Pericyte	Gender	-0.833229	-1.63035	-0.0361082		FAP	DPP4+ FAP	Gender	0.258105	-0.521881	1.03809
Pericyte	Depot	0.0778798	-0.530688	0.686448		FAP	DPP4+ FAP	Depot	1.20481	0.547096	1.86253
Plasmablast	Weight	0.262149	-0.338383	0.862681		Endometrium	Endometrium	Weight	0.0915714	-0.506794	0.689937
Plasmablast	Gender	0.571056	-0.21606	1.35817		Endometrium	Endometrium	Gender	0.284055	-0.49632	1.06443
Plasmablast	Depot	0.135669	-0.473335	0.744674		Endometrium	Endometrium	Depot	-0.756112	-1.38437	-0.127854
Schwann	Weight	0.498887	-0.10807	1.10584		Monocyte	FCN1+ Monocyte	Weight	0.105942	-0.492525	0.70441
Schwann	Gender	-0.182292	-0.961356	0.596773		Monocyte	FCN1+ Monocyte	Gender	0.332861	-0.448344	1.11407
Schwann	Depot	-0.255062	-0.865714	0.355589		Monocyte	FCN1+ Monocyte	Depot	0.766797	0.137981	1.39561
SMC	Weight	0.66781	0.0539031	1.28172		CD8+ T cell	GNLY+ CD8+ T cell	Weight	0.311454	-0.290091	0.912999
SMC	Gender	-0.842594	-1.64014	-0.0450487		CD8+ T cell	GNLY+ CD8+ T cell	Gender	0.485781	-0.298866	1.27043
SMC	Depot	0.149809	-0.459339	0.758956		CD8+ T cell	GNLY+ CD8+ T cell	Depot	0.510167	-0.107327	1.12766
VEC	Weight	-0.280584	-0.881475	0.320307		CD8+ T cell	GZMK+ CD8+ T cell	Weight	0.244277	-0.35593	0.844485
VEC	Gender	-0.623667	-1.4125	0.165166		CD8+ T cell	GZMK+ CD8+ T cell	Gender	0.47127	-0.312789	1.25533
VEC	Depot	0.753503	0.12538	1.38163		CD8+ T cell	GZMK+ CD8+ T cell	Depot	0.239725	-0.370659	0.850108
						Monocyte	HES4+ Monocyte	Weight	-0.175551	-0.774723	0.423621
						Monocyte	HES4+ Monocyte	Gender	0.294841	-0.485706	1.07539
						Monocyte	HES4+ Monocyte	Depot	0.689943	0.0649719	1.31491
						FAP	ICAM1+ FAP	Weight	0.303469	-0.297901	0.904838
						FAP	ICAM1+ FAP	Gender	0.289396	-0.491064	1.06986
						FAP	ICAM1+ FAP	Depot	0.560255	-0.0546847	1.1752
						Plasmablast	JCHAIN+ Plasmablast	Weight	0.262149	-0.338383	0.862681
						Plasmablast	JCHAIN+ Plasmablast	Gender	0.571056	-0.21606	1.35817
						Plasmablast	JCHAIN+ Plasmablast	Depot	0.135669	-0.473335	0.744674
						ILC	KIT+ ILC	Weight	0.401934	-0.201917	1.00578
						ILC	KIT+ ILC	Gender	0.371117	-0.41083	1.15306
						ILC	KIT+ ILC	Depot	0.455765	-0.159895	1.07143
						LEC	LEC	Weight	0.0656659	-0.532553	0.663885
						LEC	LEC	Gender	-0.802537	-1.5983	-0.00677255
						LEC	LEC	Depot	-1.39819	-2.07218	-0.724196
						Macrophage	LPL+ Macrophage	Weight	-0.466129	-1.07196	0.139705
						Macrophage	LPL+ Macrophage	Gender	0.226983	-0.552587	1.00655
						Macrophage	LPL+ Macrophage	Depot	0.602126	-0.018924	1.22318
						Mesothelial	LRRTM3+ Mesothelial	Weight	-0.0969795	-0.695382	0.501423
						Mesothelial	LRRTM3+ Mesothelial	Gender	0.14082	-0.637874	0.919515
						Mesothelial	LRRTM3+ Mesothelial	Depot	-2.68092	-3.49703	-1.86482
						Macrophage	LYVE1+ Macrophage	Weight	-0.352138	-0.954649	0.250372
						Macrophage	LYVE1+ Macrophage	Gender	0.125931	-0.652653	0.904516
						Macrophage	LYVE1+ Macrophage	Depot	-0.180515	-0.790021	0.42899
						B cell	MS4A1+ B cell	Weight	-0.227626	-0.827552	0.372299
						B cell	MS4A1+ B cell	Gender	0.0146848	-0.763467	0.792837
						B cell	MS4A1+ B cell	Depot	0.520377	-0.0974843	1.13824
						CD8+ T cell	MT1E+ CD8+ T cell	Weight	0.135409	-0.463314	0.734133
						CD8+ T cell	MT1E+ CD8+ T cell	Gender	0.37205	-0.409628	1.15373
						CD8+ T cell	MT1E+ CD8+ T cell	Depot	0.160518	-0.448747	0.769783
						Mesothelial	PAMR1+ Mesothelial	Weight	-0.525461	-1.13338	0.0824597
						Mesothelial	PAMR1+ Mesothelial	Gender	-0.289745	-1.07021	0.49072
						Mesothelial	PAMR1+ Mesothelial	Depot	-1.68771	-2.38966	-0.985766
						Pericyte	Pericyte	Weight	0.15134	-0.447547	0.750228
						Pericyte	Pericyte	Gender	-0.833229	-1.63035	-0.0361082
						Pericyte	Pericyte	Depot	0.0778798	-0.530688	0.686448
						pDC	PLD4+ pDC	Weight	-0.146559	-0.745396	0.452277
						pDC	PLD4+ pDC	Gender	0.429343	-0.353886	1.21257
						pDC	PLD4+ pDC	Depot	0.394879	-0.218968	1.00873
						FAP	PPARG+ FAP	Weight	0.511851	-0.0955696	1.11927
						FAP	PPARG+ FAP	Gender	-0.838391	-1.63575	-0.0410365
						FAP	PPARG+ FAP	Depot	0.321166	-0.290826	0.933159
						Adipocyte	PRSS23+ Adipocyte	Weight	-0.105284	-0.703747	0.493178
						Adipocyte	PRSS23+ Adipocyte	Gender	-0.24131	-1.02107	0.538445
						Adipocyte	PRSS23+ Adipocyte	Depot	-0.247343	-0.857857	0.363172
						Mesothelial	RACK1+ Mesothelial	Weight	0.204675	-0.394894	0.804245
						Mesothelial	RACK1+ Mesothelial	Gender	-0.627153	-1.4161	0.161799
						Mesothelial	RACK1+ Mesothelial	Depot	-2.81521	-3.6586	-1.97181
						Schwann	Schwann	Weight	0.498887	-0.10807	1.10584
						Schwann	Schwann	Gender	-0.182292	-0.961356	0.596773
						Schwann	Schwann	Depot	-0.255062	-0.865714	0.355589
						CD4+ T cell	SELL+ CD4+ T cell	Weight	-0.373822	-0.976894	0.229251
						CD4+ T cell	SELL+ CD4+ T cell	Gender	-0.161136	-0.94	0.617728
						CD4+ T cell	SELL+ CD4+ T cell	Depot	0.826901	0.194814	1.45899
						CD4+ T cell	SKAP1+ CD4+ T cell	Weight	-0.418094	-1.02242	0.186229
						CD4+ T cell	SKAP1+ CD4+ T cell	Gender	0.350574	-0.430964	1.13211
						CD4+ T cell	SKAP1+ CD4+ T cell	Depot	-0.260992	-0.871751	0.349768
						CD8+ T cell	SLC4A10+ CD8+ T cell	Weight	0.444941	-0.157829	1.04771
						CD8+ T cell	SLC4A10+ CD8+ T cell	Gender	0.393435	-0.388334	1.1752
						CD8+ T cell	SLC4A10+ CD8+ T cell	Depot	0.411868	-0.201114	1.02485
						SMC	SMC	Weight	0.66781	0.0539031	1.28172
						SMC	SMC	Gender	-0.842594	-1.64014	-0.0450487
						SMC	SMC	Depot	0.149809	-0.459339	0.758956
						VEC	SOX5+ VEC	Weight	-0.226622	-0.826532	0.373287
						VEC	SOX5+ VEC	Gender	-0.766701	-1.56094	0.0275407
						VEC	SOX5+ VEC	Depot	0.529558	-0.0886394	1.14776
						NK cell	XCL1+ NK cell	Weight	-0.0331894	-0.631293	0.564914
						NK cell	XCL1+ NK cell	Gender	0.606343	-0.181908	1.39459
						NK cell	XCL1+ NK cell	Depot	0.110792	-0.497995	0.71958
