# Supplementary material for: Interpretable joint clustering of single-cell transcriptomes
Source: Research Square preprint supplement (doi:10.21203/rs.3.rs-3149275/v1), 2023-07-28
Supplement: Supplementary file 2 [file 4762722f4ca5a7d3d117113b.pdf]

# Supplementary Figure 4

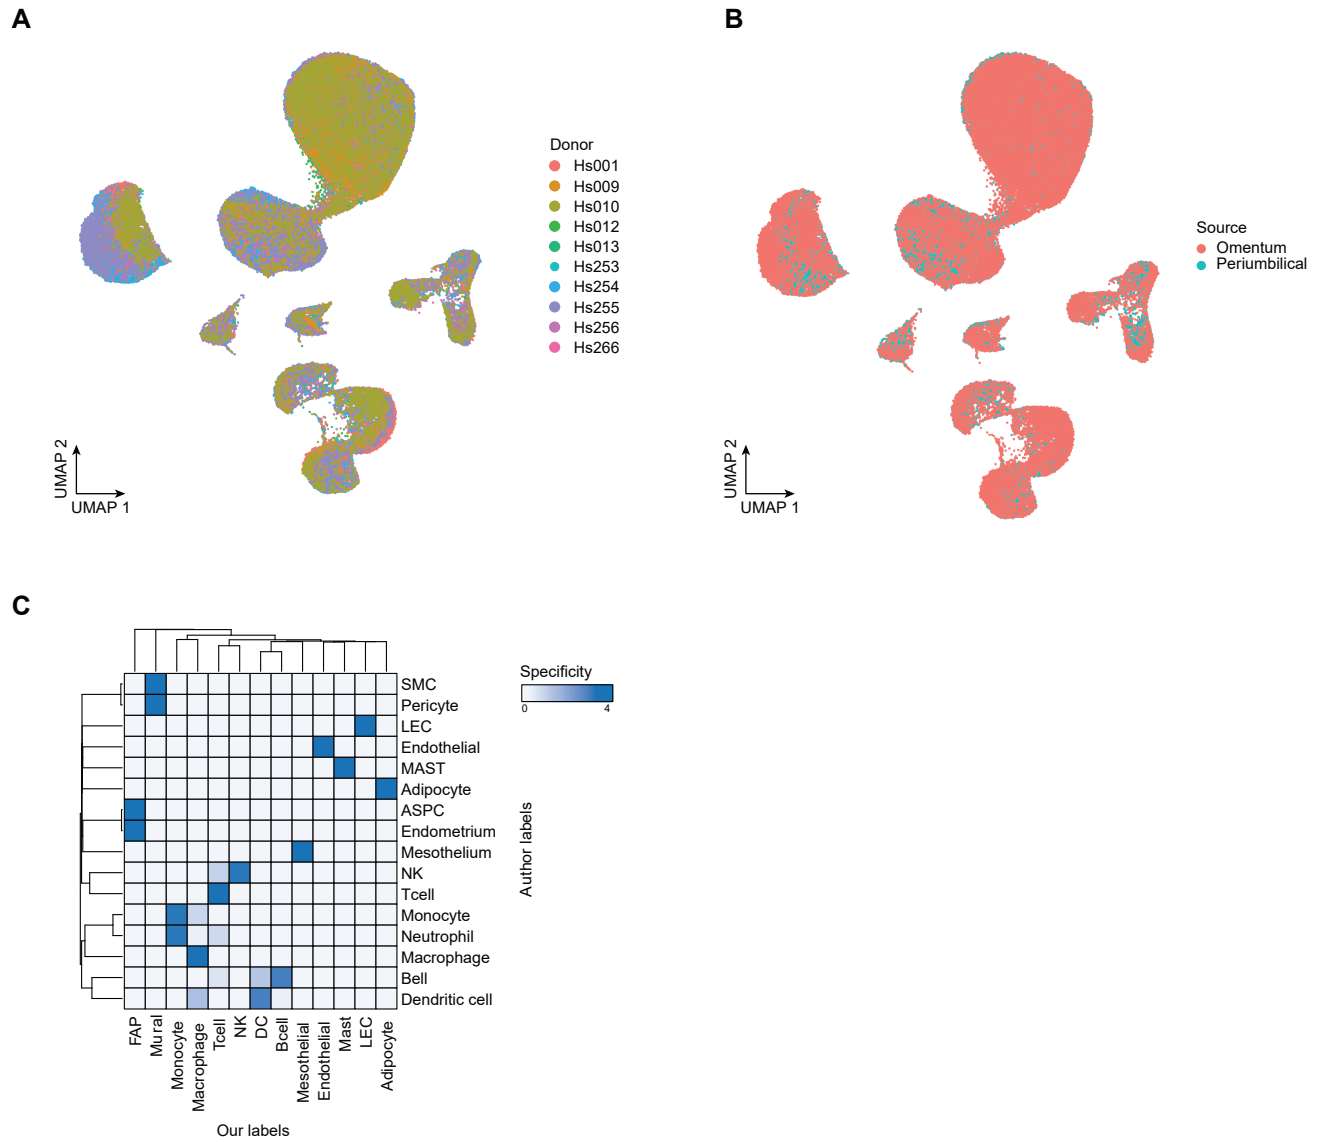

**Supplementary Figure 4: A-B)** UMAPs of adipose tissue atlas from 9 batches superimposed with (A) donor and (B) source **C)** Heatmap showing agreement of cluster labels identified using JOITNLY to author labels of the Emont et al. adipose dataset.
