# Supplementary material for: Interpretable joint clustering of single-cell transcriptomes
Source: Research Square preprint supplement (doi:10.21203/rs.3.rs-3149275/v1), 2023-07-28
Supplement: Supplementary file 3 [file 629a068a7315836026e531a8.pdf]

# Supplementary Figure 5

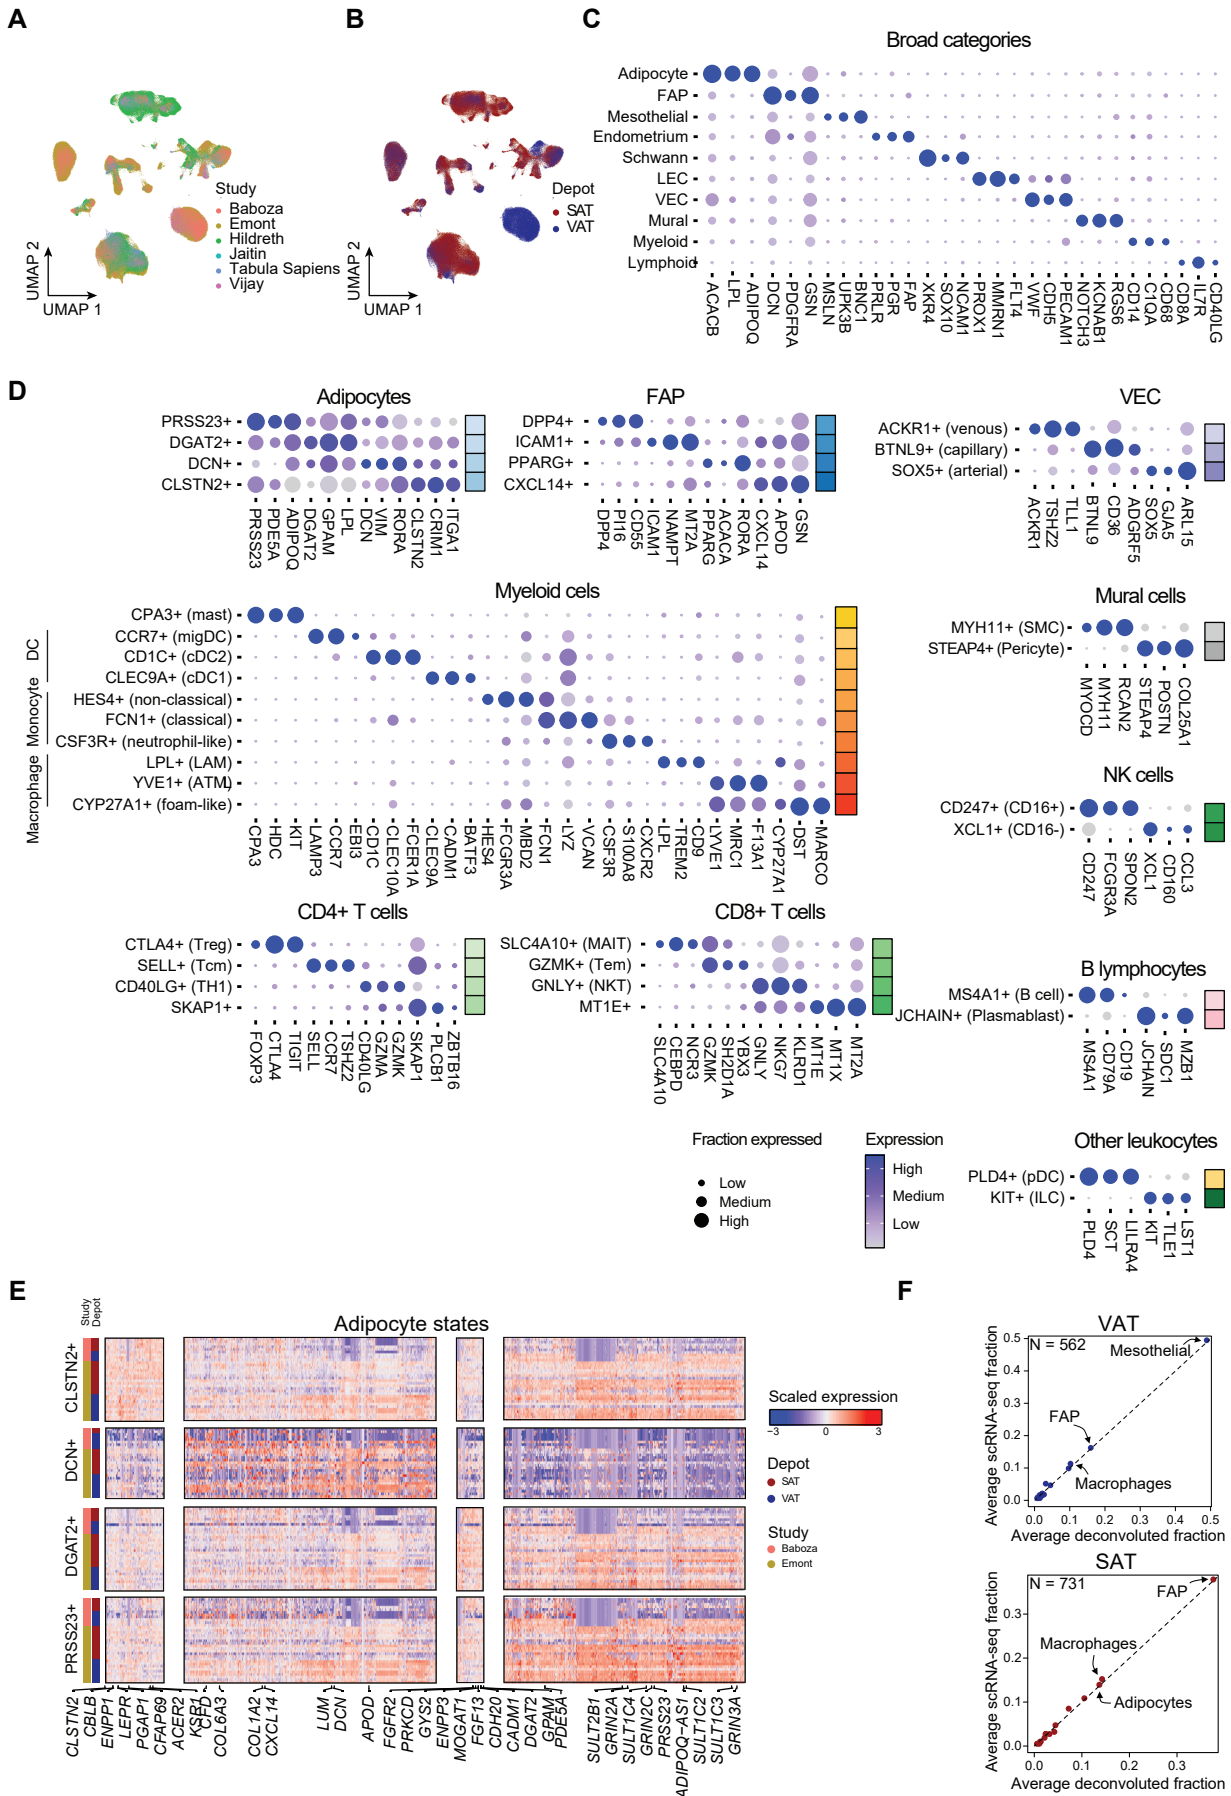

**Supplementary Figure 5: A-B)** WATLAS UMAPs superimposed with (A) study and (B) depot annotations. **C-D)** Dotplots showing marker genes for broad cell type categories and subtypes, as indicated on the figure. **E)** Heatmap showing pseudo-bulk expression levels of genes identified as differentially expressed in the indicated adipocyte populations across all populations, depots, and studies. **F)** Scatterplot showing the linear relationship between average fraction of the cell types in WATLAS and the average deconvoluted fractions for VAT and SAT depots (left and right panel respectively).
