# Supplementary material for: Interpretable joint clustering of single-cell transcriptomes
Source: Research Square preprint supplement (doi:10.21203/rs.3.rs-3149275/v1), 2023-07-28
Supplement: Supplementary file 4 [file 6bc000c97a8e351d5da32a17.pdf]

## Supplementary Figure 3

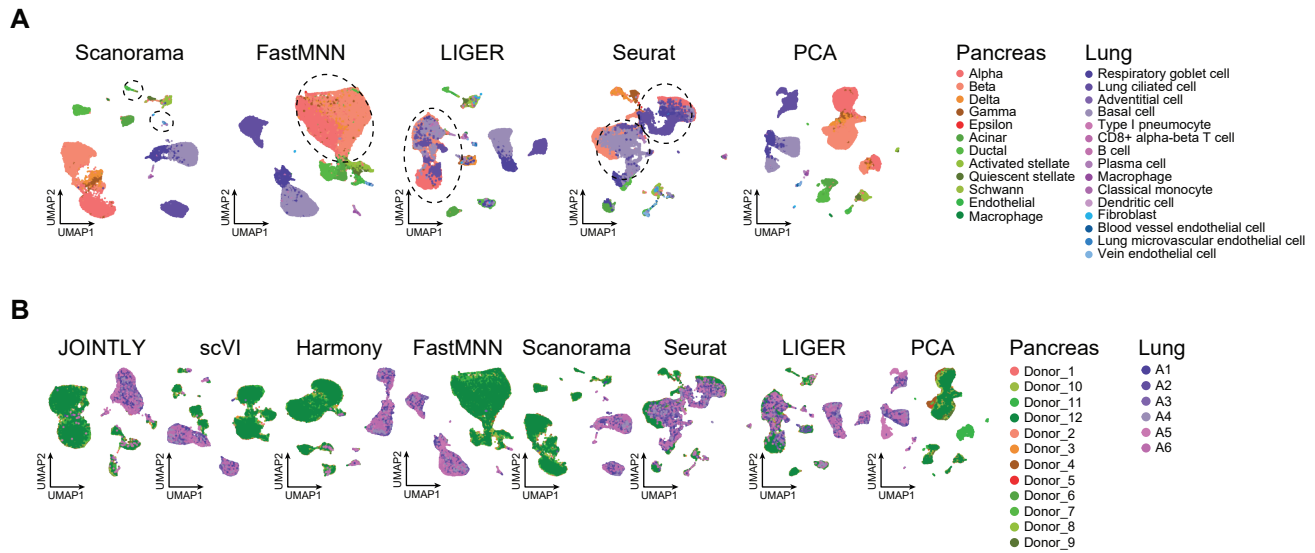

**Supplementary Figure 3: A)** UMAPs of integration of pancreas and lung tissue (Scanorama, fastMNN, LIGER, Seurat and PCA, from left) superimposed with cell type information. **B)** UMAPs showing donor labels for the indicated methods.
