# Supplementary material for: Interpretable joint clustering of single-cell transcriptomes
Source: Research Square preprint supplement (doi:10.21203/rs.3.rs-3149275/v1), 2023-07-28
Supplement: Supplementary file 5 [file eb987ac33da0f698ccfb5dc4.pdf]

# Supplementary Figure 2

A

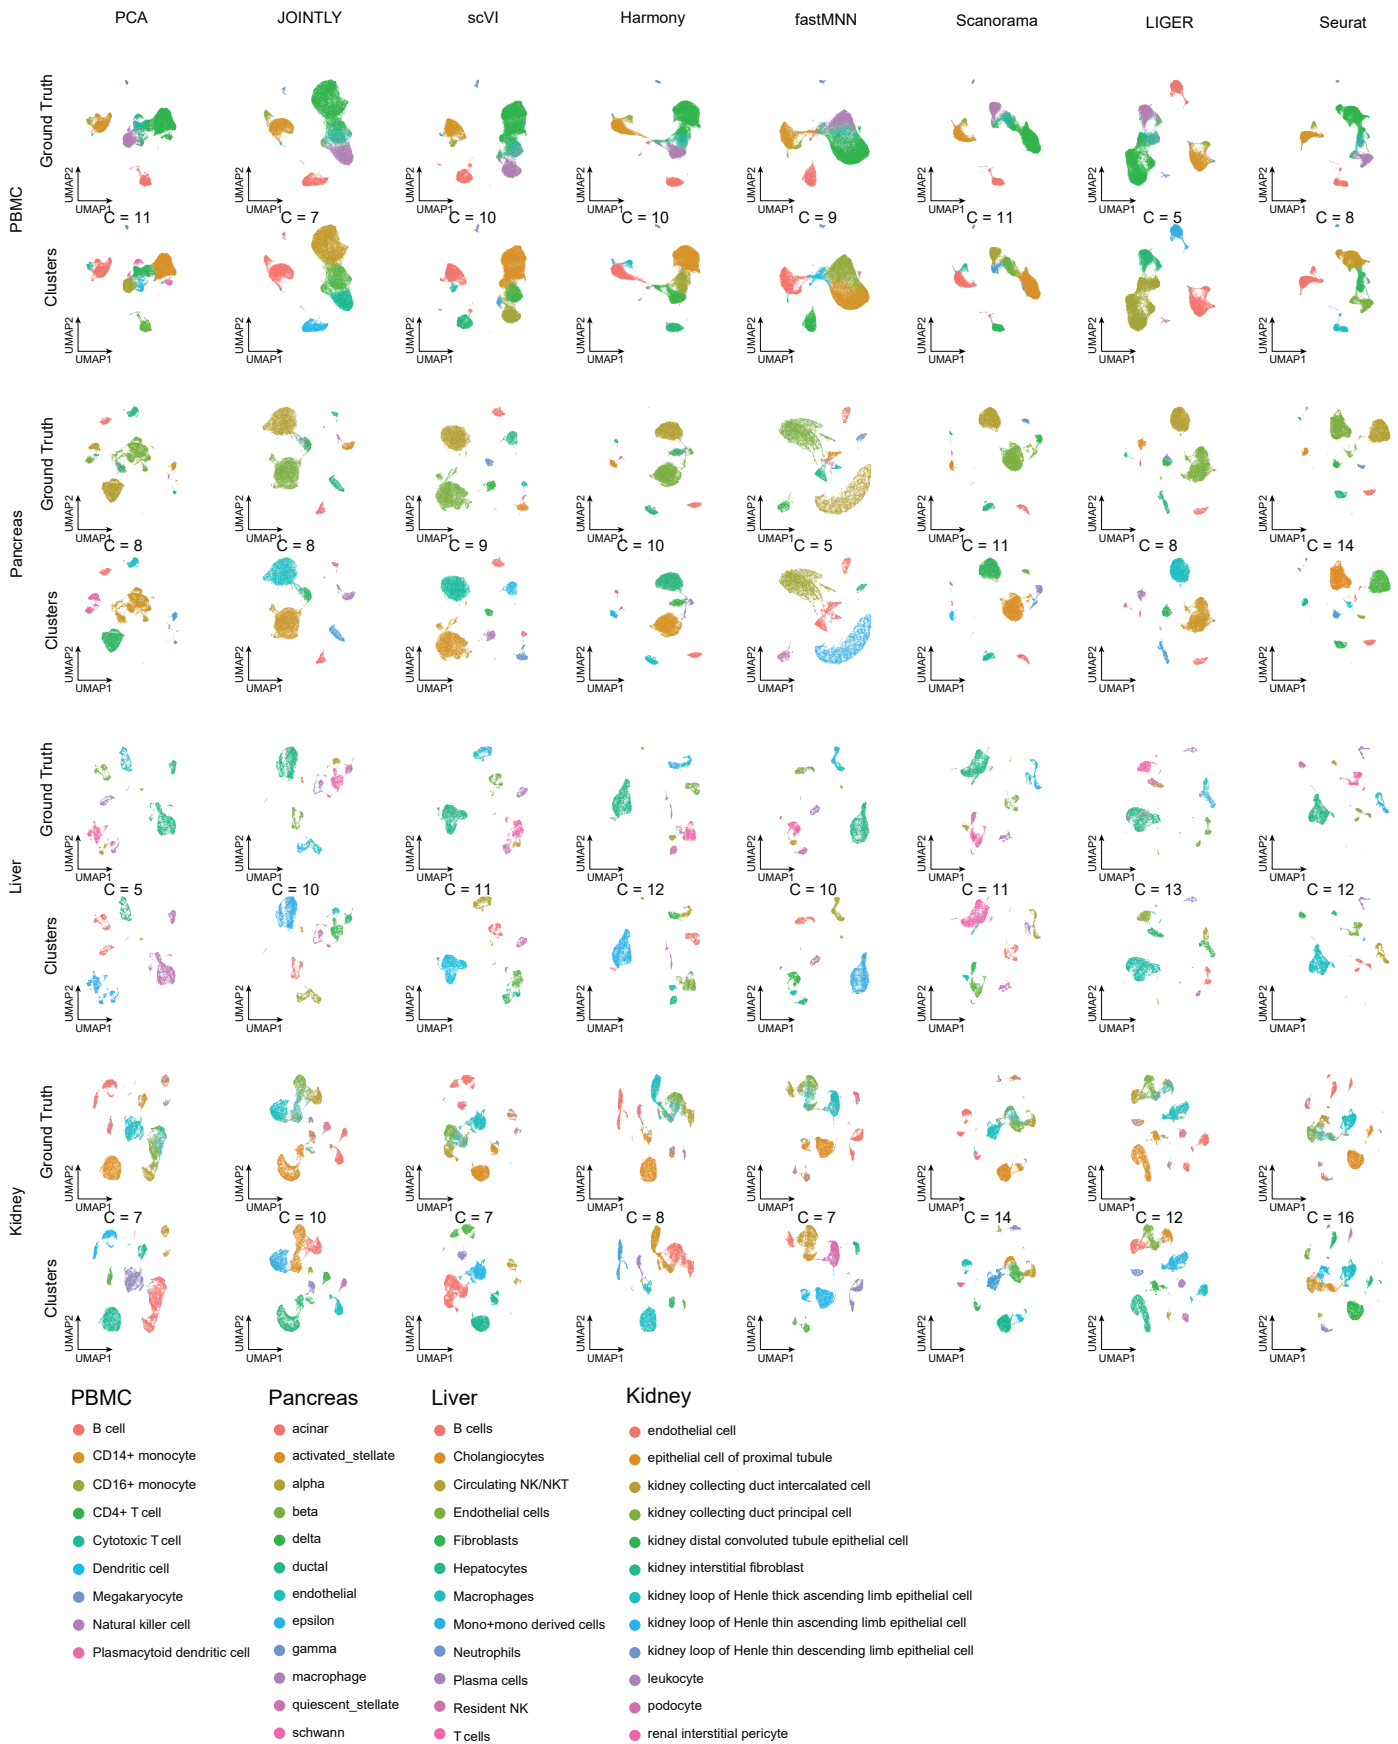

**Supplementary Figure 2: A)** UMAPs of the 5 datasets, PBMC, lung, pancreas, liver, and kidney (from the top). On each dataset, we have visualized cell type labels and clusters (top and bottom row respectively). Each dataset was embedded and clusters using no integration, JOINTLY, and additional 6 integration methods (each column is a method). C indicates the number of clusters with the highest ARI score.
